# Supplementary material
Source: publisher site journal article supplement (https://www.dovepress.com/article/487700)
Supplement: Supplementary file 1 [file get_supplementary_file.php]

Supplementary Material 1 Virulence genes within the genomes of 99 *K. pneumoniae* strains.

|  | **1** | **2** | **3** | **4** | **5** | **6** | **7** | **8** |
| --- | --- | --- | --- | --- | --- | --- | --- | --- |
| **#FILE** | **NUM_FOUND** | **AAA92657** | **KP1_RS17220** | **KP1_RS17225** | **KP1_RS17230** | **KP1_RS17240** | **KP1_RS17280** | **KP1_RS17340** |
| A1.fasta | 84 | . | 100 | 99.56 | 100 | 100 | 100 | 99.29 |
| GCA_002186705.1.fasta | 70 | . | 100 | 100 | 100 | 100 | 100 | 99.29 |
| GCA_002186945.1.fasta | 70 | . | 100 | 100 | 100 | 100 | 100 | 99.29 |
| GCA_002187375.1.fasta | 69 | . | 100 | 100 | 100 | 100 | 100 | 99.29 |
| GCA_002187715.1.fasta | 81 | . | 100 | 100 | 100 | 100 | 100 | 99.29 |
| GCA_002188235.1.fasta | 81 | . | 100 | 100 | 100 | 100 | 100 | 99.29 |
| GCA_003195295.1.fasta | 81 | . | 100 | 100 | 100 | 100 | 100 | 99.29 |
| GCA_014788765.1.fasta | 81 | . | 100 | 100 | 100 | 100 | 100 | 99.29 |
| GCA_015720195.1.fasta | 81 | . | 100 | 100 | 100 | 100 | 100 | 99.29 |
| GCA_021920105.1.fasta | 81 | . | 100 | 100 | 100 | 100 | 100 | 99.29 |
| GCA_021920885.1.fasta | 81 | . | 100 | 100 | 100 | 100 | 100 | 99.29 |
| GCA_021920985.1.fasta | 81 | . | 100 | 100 | 100 | 100 | 100 | 99.29 |
| GCA_021925685.1.fasta | 81 | . | 100 | 100 | 100 | 100 | 100 | 99.29 |
| GCA_021926845.1.fasta | 81 | . | 100 | 100 | 100 | 100 | 100 | 99.29 |
| GCA_021928295.1.fasta | 81 | . | 100 | 100 | 100 | 100 | 100 | 99.29 |
| GCA_021928995.1.fasta | 81 | . | 100 | 100 | 100 | 100 | 100 | 99.29 |
| GCA_021929455.1.fasta | 81 | . | 100 | 100 | 100 | 100 | 100 | 99.21 |
| GCA_021933415.1.fasta | 86 | . | 100 | 100 | 100 | 100 | 100 | 99.29 |
| GCA_021956765.1.fasta | 70 | . | 100 | 100 | 100 | 100 | 100 | 99.29 |
| GCA_021957705.1.fasta | 81 | . | 100 | 100 | 100 | 100 | 100 | 99.29 |
| GCA_022048705.1.fasta | 70 | . | 100 | 100 | 100 | 100 | 100 | 99.29 |
| GCA_022061125.1.fasta | 81 | . | 100 | 100 | 100 | 100 | 100 | 99.29 |
| GCA_022084535.1.fasta | 81 | . | 100 | 100 | 100 | 100 | 100 | 99.29 |
| GCA_022176145.1.fasta | 81 | . | 100 | 100 | 100 | 100 | 100 | 99.29 |
| GCA_022176185.1.fasta | 81 | . | 100 | 100 | 100 | 100 | 100 | 99.29 |
| GCA_022176205.1.fasta | 81 | . | 100 | 100 | 100 | 100 | 100 | 99.29 |
| GCA_022176585.1.fasta | 81 | . | 100 | 100 | 100 | 100 | 100 | 99.29 |
| GCA_022176645.1.fasta | 81 | . | 100 | 100 | 100 | 100 | 100 | 99.29 |
| GCA_022233245.1.fasta | 90 | . | 100 | 100 | 100 | 100 | 100 | 99.29 |
| GCA_022233305.1.fasta | 90 | . | 100 | 100 | 100 | 100 | 100 | 99.29 |
| GCA_022233405.1.fasta | 87 | . | 100 | 100 | 100 | 100 | 100 | 99.29 |
| GCA_022250515.1.fasta | 74 | 99.83 | 100 | 100 | 100 | 100 | 100 | 99.29 |
| GCA_022270255.1.fasta | 81 | . | 100 | 100 | 100 | 100 | 100 | 99.29 |
| GCA_022270275.1.fasta | 81 | . | 100 | 100 | 100 | 100 | 100 | 99.29 |
| GCA_022270495.1.fasta | 80 | . | 96.44 | . | 100 | 100 | 100 | 99.29 |
| GCA_022270575.1.fasta | 81 | . | 100 | 100 | 100 | 100 | 100 | 99.29 |
| GCA_022270615.1.fasta | 81 | . | 100 | 100 | 100 | 100 | 100 | 99.29 |
| GCA_022270695.1.fasta | 81 | . | 89.25 | 96.5 | 94.3 | 100 | 100 | 99.29 |
| GCA_024392555.1.fasta | 68 | . | 100 | 100 | 100 | 100 | 100 | 99.29 |
| GCA_024474865.1.fasta | 70 | . | 100 | 100 | 100 | 100 | 100 | 99.29 |
| GCA_025101225.1.fasta | 91 | 99.83 | 100 | 100 | 100 | 100 | 100 | 99.29 |
| GCA_026361275.1.fasta | 80 | . | 100 | 100 | 100 | 100 | 100 | 99.29 |
| GCA_030786325.1.fasta | 71 | . | 100 | 100 | 100 | 100 | 100 | 99.29 |
| GCA_030820975.1.fasta | 81 | . | 100 | 100 | 100 | 100 | 100 | 99.29 |
| GCA_032044555.1.fasta | 89 | . | 100 | 100 | 100 | 100 | 100 | 99.29 |
| GCA_032046295.1.fasta | 81 | . | 100 | 100 | 100 | 100 | 100 | 99.29 |
| GCA_032062785.1.fasta | 81 | . | 100 | 100 | 100 | 100 | 100 | 99.29 |
| GCA_032066125.1.fasta | 81 | . | 100 | 100 | 100 | 100 | 100 | 99.29 |
| GCA_032066145.1.fasta | 81 | . | 100 | 100 | 100 | 100 | 100 | 99.29 |
| GCA_032070585.1.fasta | 80 | . | 85.53 | 96.33 | 100 | 100 | 100 | 99.29 |
| GCA_032070965.1.fasta | 81 | . | 93.3 | 100 | 100 | 100 | 100 | 99.29 |
| GCA_032072835.1.fasta | 81 | . | 100 | 100 | 100 | 100 | 100 | 99.29 |
| GCA_032077145.1.fasta | 81 | . | 100 | 100 | 100 | 100 | 100 | 99.29 |
| GCA_032128025.1.fasta | 87 | . | 100 | 92.65 | 100 | 100 | 100 | 99.29 |
| GCA_032129715.1.fasta | 81 | . | 100 | 100 | 100 | 100 | 100 | 99.29 |
| GCA_032132495.1.fasta | 81 | . | 100 | 100 | 100 | 100 | 100 | 99.29 |
| GCA_032132835.1.fasta | 81 | . | 100 | 100 | 100 | 100 | 100 | 99.29 |
| GCA_032134135.1.fasta | 81 | . | 100 | 100 | 100 | 100 | 100 | 99.29 |
| GCA_032134975.1.fasta | 80 | . | 100 | 100 | 100 | 100 | 100 | 99.29 |
| GCA_032137635.1.fasta | 81 | . | 100 | 100 | 100 | 100 | 100 | 99.29 |
| GCA_032153315.1.fasta | 81 | . | 100 | 100 | 100 | 100 | 100 | 99.29 |
| GCA_032155885.1.fasta | 81 | . | 100 | 100 | 100 | 100 | 100 | 99.29 |
| GCA_032411785.1.fasta | 81 | . | 100 | 100 | 100 | 100 | 100 | 99.29 |
| GCA_033106885.1.fasta | 85 | . | 100 | 100 | 100 | 100 | 100 | 99.29 |
| GCA_033107445.1.fasta | 85 | . | 100 | 100 | 100 | 100 | 100 | 99.29 |
| GCA_033108425.1.fasta | 86 | . | 100 | 100 | 100 | 100 | 100 | 99.29 |
| GCA_033122545.1.fasta | 81 | . | 100 | 100 | 100 | 100 | 100 | 99.29 |
| GCA_900181095.1.fasta | 70 | . | 100 | 100 | 100 | 100 | 100 | 99.29 |
| GCA_900502575.1.fasta | 81 | . | 100 | 100 | 100 | 100 | 100 | 99.29 |
| GCA_900503265.1.fasta | 70 | . | 100 | 100 | 100 | 100 | 100 | 99.29 |
| GCA_900504655.1.fasta | 70 | . | 100 | 100 | 100 | 100 | 100 | 99.29 |
| GCA_900504955.1.fasta | 81 | . | 100 | 100 | 100 | 100 | 100 | 99.29 |
| GCA_900506745.1.fasta | 81 | . | 100 | 100 | 100 | 100 | 100 | 99.29 |
| GCA_900512545.1.fasta | 81 | . | 100 | 100 | 100 | 100 | 100 | 99.29 |
| GCF_021441845.1.fasta | 70 | . | 100 | 100 | 100 | 100 | 100 | 99.29 |
| GCF_024495065.1.fasta | 70 | . | 100 | 100 | 100 | 100 | 100 | 99.29 |
| GCF_024495515.1.fasta | 70 | . | 100 | 100 | 100 | 100 | 100 | 99.29 |
| SAMEA113605448.fasta | 80 | . | . | 95.45 | 100 | 100 | 100 | 99.29 |
| SAMEA113605746.fasta | 74 | . | . | 99.13 | 100 | 100 | 100 | . |
| SAMEA2052930.fasta | 81 | . | 100 | 100 | 100 | 100 | 100 | 99.29 |
| SAMEA2633723.fasta | 87 | . | 100 | 100 | 100 | 100 | 100 | 99.29 |
| SAMEA3281566.fasta | 70 | . | 100 | 100 | 100 | 100 | 100 | 99.29 |
| SAMEA5758680.fasta | 81 | . | 100 | 100 | 100 | 100 | 100 | 99.29 |
| SAMEA6155812.fasta | 81 | . | 100 | 100 | 100 | 100 | 100 | 99.29 |
| SAMEA6155829.fasta | 81 | . | 100 | 100 | 100 | 100 | 100 | 99.29 |
| SAMEA6155886.fasta | 81 | . | 100 | 100 | 100 | 100 | 100 | 99.29 |
| SAMEA6156048.fasta | 81 | . | 100 | 100 | 100 | 100 | 100 | 99.29 |
| SAMEA6375606.fasta | 70 | . | 100 | 100 | 100 | 100 | 100 | 99.29 |
| SAMEA6635864.fasta | 81 | . | 100 | 100 | 100 | 100 | 100 | 99.29 |
| SAMEA6654214.fasta | 81 | . | 100 | 100 | 100 | 100 | 100 | 99.29 |
| SAMEA6654216.fasta | 81 | . | 100 | 100 | 100 | 100 | 100 | 99.29 |
| SAMEA6654217.fasta | 81 | . | 100 | 100 | 100 | 100 | 100 | 99.29 |
| SAMEA6654218.fasta | 81 | . | 100 | 100 | 100 | 100 | 100 | 99.29 |
| SAMEA7472332.fasta | 70 | . | 100 | 100 | 100 | 100 | 100 | 99.29 |
| SAMEA7472348.fasta | 80 | . | 100 | 100 | 100 | 100 | 100 | 99.29 |
| SAMN16197932.fasta | 81 | . | 100 | 100 | 100 | 100 | 100 | 99.29 |
| SAMN16197933.fasta | 81 | . | 100 | 100 | 100 | 100 | 100 | 99.29 |
| SAMN16197935.fasta | 81 | . | 100 | 100 | 100 | 100 | 100 | 99.29 |
| SAMN17981712.fasta | 70 | . | 100 | 100 | 100 | 100 | 100 | 99.29 |

|  | **9** | **10** | **11** | **12** | **13** | **14** | **15** | **16** | **17** | **18** | **19** | **20** |
| --- | --- | --- | --- | --- | --- | --- | --- | --- | --- | --- | --- | --- |
| **#FILE** | **KP1_RS17345** | **KP1_RS17355** | **acrA** | **acrB** | **allA** | **allB** | **allC** | **allD** | **allR** | **allS** | **clpV/tssH** | **dotU/tssL** |
| A1.fasta | 100 | 99.84 | 100 | 100 | . | . | . | . | . | . | 100 | 100 |
| GCA_002186705.1.fasta | 100 | 99.84 | 100 | 100 | . | . | . | . | . | . | 100 | 100 |
| GCA_002186945.1.fasta | 100 | 99.84 | 100 | 100 | . | . | . | . | . | . | 100 | 100 |
| GCA_002187375.1.fasta | 100 | 99.84 | 100 | 100 | . | . | . | . | . | . | 100 | 100 |
| GCA_002187715.1.fasta | 100 | 99.84 | 100 | 100 | . | . | . | . | . | . | 100 | 100 |
| GCA_002188235.1.fasta | 100 | 99.84 | 100 | 100 | . | . | . | . | . | . | 100 | 100 |
| GCA_003195295.1.fasta | 100 | 99.84 | 100 | 100 | . | . | . | . | . | . | 100 | 100 |
| GCA_014788765.1.fasta | 100 | 99.84 | 100 | 100 | . | . | . | . | . | . | 100 | 100 |
| GCA_015720195.1.fasta | 100 | 99.84 | 100 | 100 | . | . | . | . | . | . | 100 | 100 |
| GCA_021920105.1.fasta | 100 | 99.84 | 100 | 100 | . | . | . | . | . | . | 100 | 100 |
| GCA_021920885.1.fasta | 100 | 99.84 | 100 | 100 | . | . | . | . | . | . | 100 | 100 |
| GCA_021920985.1.fasta | 100 | 99.84 | 100 | 100 | . | . | . | . | . | . | 100 | 100 |
| GCA_021925685.1.fasta | 100 | 99.84 | 100 | 100 | . | . | . | . | . | . | 100 | 100 |
| GCA_021926845.1.fasta | 100 | 99.84 | 100 | 100 | . | . | . | . | . | . | 100 | 100 |
| GCA_021928295.1.fasta | 100 | 99.84 | 100 | 100 | . | . | . | . | . | . | 100 | 100 |
| GCA_021928995.1.fasta | 100 | 99.84 | 100 | 100 | . | . | . | . | . | . | 100 | 100 |
| GCA_021929455.1.fasta | 100 | 99.84 | 100 | 100 | . | . | . | . | . | . | 100 | 100 |
| GCA_021933415.1.fasta | 100 | 99.84 | 100 | 100 | 100 | 100 | 100 | 100 | 100 | 100 | 100 | 100 |
| GCA_021956765.1.fasta | 100 | 99.84 | 100 | 100 | . | . | . | . | . | . | 100 | 100 |
| GCA_021957705.1.fasta | 100 | 99.84 | 100 | 100 | . | . | . | . | . | . | 100 | 100 |
| GCA_022048705.1.fasta | 100 | 99.84 | 100 | 100 | . | . | . | . | . | . | 100 | 100 |
| GCA_022061125.1.fasta | 100 | 99.84 | 100 | 100 | . | . | . | . | . | . | 100 | 100 |
| GCA_022084535.1.fasta | 100 | 99.84 | 100 | 100 | . | . | . | . | . | . | 100 | 100 |
| GCA_022176145.1.fasta | 100 | 99.84 | 100 | 100 | . | . | . | . | . | . | 100 | 100 |
| GCA_022176185.1.fasta | 100 | 99.84 | 100 | 100 | . | . | . | . | . | . | 100 | 100 |
| GCA_022176205.1.fasta | 100 | 99.84 | 100 | 100 | . | . | . | . | . | . | 100 | 100 |
| GCA_022176585.1.fasta | 100 | 99.84 | 100 | 100 | . | . | . | . | . | . | 100 | 100 |
| GCA_022176645.1.fasta | 100 | 99.84 | 100 | 100 | . | . | . | . | . | . | 100 | 100 |
| GCA_022233245.1.fasta | 100 | 99.84 | 100 | 100 | . | . | . | . | . | . | 100 | 100 |
| GCA_022233305.1.fasta | 100 | 99.84 | 100 | 100 | . | . | . | . | . | . | 100 | 100 |
| GCA_022233405.1.fasta | 100 | 99.84 | 100 | 100 | 100 | 100 | 100 | 100 | 100 | 100 | 100 | 100 |
| GCA_022250515.1.fasta | 100 | 99.84 | 100 | 100 | . | . | . | . | . | . | 100 | 100 |
| GCA_022270255.1.fasta | 100 | 99.84 | 100 | 100 | . | . | . | . | . | . | 100 | 100 |
| GCA_022270275.1.fasta | 100 | 99.84 | 100 | 100 | . | . | . | . | . | . | 100 | 100 |
| GCA_022270495.1.fasta | 100 | 99.84 | 100 | 100 | . | . | . | . | . | . | 100 | 100 |
| GCA_022270575.1.fasta | 100 | 99.84 | 100 | 100 | . | . | . | . | . | . | 100 | 100 |
| GCA_022270615.1.fasta | 100 | 99.84 | 100 | 100 | . | . | . | . | . | . | 100 | 100 |
| GCA_022270695.1.fasta | 100 | 99.84 | 100 | 100 | . | . | . | . | . | . | 100 | 100 |
| GCA_024392555.1.fasta | 100 | 99.84 | 100 | 100 | . | . | . | . | . | . | 100 | 100 |
| GCA_024474865.1.fasta | 100 | 99.84 | 100 | 100 | . | . | . | . | . | . | 100 | 100 |
| GCA_025101225.1.fasta | 100 | 99.84 | 100 | 100 | . | . | . | . | . | . | 100 | 100 |
| GCA_026361275.1.fasta | 100 | 99.84 | 100 | 100 | . | . | . | . | . | . | 100 | 100 |
| GCA_030786325.1.fasta | 100 | 99.84 | 100 | 100 | . | . | . | . | . | . | 100 | 100 |
| GCA_030820975.1.fasta | 100 | 99.84 | 100 | 100 | . | . | . | . | . | . | 100 | 100 |
| GCA_032044555.1.fasta | 100 | 99.84 | 100 | 100 | . | . | . | . | . | . | 100 | 100 |
| GCA_032046295.1.fasta | 100 | 99.84 | 100 | 100 | . | . | . | . | . | . | 100 | 100 |
| GCA_032062785.1.fasta | 100 | 99.84 | 100 | 100 | . | . | . | . | . | . | 100 | 100 |
| GCA_032066125.1.fasta | 100 | 99.84 | 100 | 100 | . | . | . | . | . | . | 100 | 100 |
| GCA_032066145.1.fasta | 100 | 99.84 | 100 | 100 | . | . | . | . | . | . | 100 | 100 |
| GCA_032070585.1.fasta | 100 | 99.84 | 100 | 100 | . | . | . | . | . | . | 100 | 100 |
| GCA_032070965.1.fasta | 100 | 99.84 | 100 | 100 | . | . | . | . | . | . | 100 | 100 |
| GCA_032072835.1.fasta | 100 | 99.84 | 100 | 100 | . | . | . | . | . | . | 100 | 100 |
| GCA_032077145.1.fasta | 100 | 99.84 | 100 | 100 | . | . | . | . | . | . | 100 | 100 |
| GCA_032128025.1.fasta | 100 | 99.84 | 100 | 100 | 100 | 100 | 100 | 100 | 100 | 100 | 100 | 100 |
| GCA_032129715.1.fasta | 100 | 99.84 | 100 | 100 | . | . | . | . | . | . | 100 | 100 |
| GCA_032132495.1.fasta | 100 | 99.84 | 100 | 100 | . | . | . | . | . | . | 100 | 100 |
| GCA_032132835.1.fasta | 100 | 99.84 | 100 | 100 | . | . | . | . | . | . | 100 | 100 |
| GCA_032134135.1.fasta | 100 | 99.84 | 100 | 100 | . | . | . | . | . | . | 100 | 100 |
| GCA_032134975.1.fasta | 100 | . | 100 | 100 | . | . | . | . | . | . | 100 | 100 |
| GCA_032137635.1.fasta | 100 | 99.84 | 100 | 100 | . | . | . | . | . | . | 100 | 100 |
| GCA_032153315.1.fasta | 100 | 99.84 | 100 | 100 | . | . | . | . | . | . | 100 | 100 |
| GCA_032155885.1.fasta | 100 | 99.84 | 100 | 100 | . | . | . | . | . | . | 100 | 100 |
| GCA_032411785.1.fasta | 100 | 99.84 | 100 | 100 | . | . | . | . | . | . | 100 | 100 |
| GCA_033106885.1.fasta | 100 | 99.84 | 100 | 100 | 100 | 100 | 100 | 100 | 100 | 100 | 100 | 100 |
| GCA_033107445.1.fasta | 100 | 99.84 | 100 | 100 | 100 | 100 | 100 | 100 | 100 | 100 | 100 | 100 |
| GCA_033108425.1.fasta | 100 | 99.84 | 100 | 100 | . | . | . | . | . | . | 100 | 100 |
| GCA_033122545.1.fasta | 100 | 99.84 | 100 | 98.79 | . | . | . | . | . | . | 100 | 100 |
| GCA_900181095.1.fasta | 100 | 99.84 | 100 | 100 | . | . | . | . | . | . | 100 | 100 |
| GCA_900502575.1.fasta | 100 | 99.84 | 100 | 100 | . | . | . | . | . | . | 100 | 100 |
| GCA_900503265.1.fasta | 100 | 99.84 | 100 | 100 | . | . | . | . | . | . | 100 | 100 |
| GCA_900504655.1.fasta | 100 | 99.84 | 100 | 100 | . | . | . | . | . | . | 100 | 100 |
| GCA_900504955.1.fasta | 100 | 99.84 | 100 | 100 | . | . | . | . | . | . | 100 | 100 |
| GCA_900506745.1.fasta | 100 | 99.84 | 100 | 100 | . | . | . | . | . | . | 100 | 100 |
| GCA_900512545.1.fasta | 100 | 99.84 | 100 | 100 | . | . | . | . | . | . | 100 | 100 |
| GCF_021441845.1.fasta | 100 | 99.84 | 100 | 100 | . | . | . | . | . | . | 100 | 100 |
| GCF_024495065.1.fasta | 100 | 99.84 | 100 | 100 | . | . | . | . | . | . | 100 | 100 |
| GCF_024495515.1.fasta | 100 | 99.84 | 100 | 100 | . | . | . | . | . | . | 100 | 100 |
| SAMEA113605448.fasta | 100 | 99.84 | 100 | 100 | . | . | . | . | . | . | 100 | 100 |
| SAMEA113605746.fasta | . | . | 100 | 100 | . | . | . | . | . | . | 100 | 100 |
| SAMEA2052930.fasta | 100 | 99.84 | 100 | 100 | . | . | . | . | . | . | 100 | 100 |
| SAMEA2633723.fasta | 100 | 99.84 | 100 | 100 | 100 | 100 | 100 | 100 | 100 | 100 | 100 | 100 |
| SAMEA3281566.fasta | 100 | 99.84 | 100 | 100 | . | . | . | . | . | . | 100 | 100 |
| SAMEA5758680.fasta | 100 | 99.84 | 100 | 100 | . | . | . | . | . | . | 100 | 100 |
| SAMEA6155812.fasta | 100 | 99.84 | 100 | 100 | . | . | . | . | . | . | 100 | 100 |
| SAMEA6155829.fasta | 100 | 99.84 | 100 | 100 | . | . | . | . | . | . | 100 | 100 |
| SAMEA6155886.fasta | 100 | 99.84 | 100 | 100 | . | . | . | . | . | . | 100 | 100 |
| SAMEA6156048.fasta | 100 | 99.84 | 100 | 100 | . | . | . | . | . | . | 100 | 100 |
| SAMEA6375606.fasta | 100 | 99.84 | 100 | 100 | . | . | . | . | . | . | 100 | 100 |
| SAMEA6635864.fasta | 100 | 99.84 | 100 | 100 | . | . | . | . | . | . | 100 | 100 |
| SAMEA6654214.fasta | 100 | 99.84 | 100 | 100 | . | . | . | . | . | . | 100 | 100 |
| SAMEA6654216.fasta | 100 | 99.84 | 100 | 100 | . | . | . | . | . | . | 100 | 100 |
| SAMEA6654217.fasta | 100 | 99.84 | 100 | 100 | . | . | . | . | . | . | 100 | 99.86 |
| SAMEA6654218.fasta | 100 | 99.84 | 100 | 100 | . | . | . | . | . | . | 100 | 100 |
| SAMEA7472332.fasta | 100 | 99.84 | 100 | 100 | . | . | . | . | . | . | 100 | 100 |
| SAMEA7472348.fasta | 100 | 99.84 | 100 | 100 | . | . | . | . | . | . | 100 | 100 |
| SAMN16197932.fasta | 100 | 99.84 | 100 | 100 | . | . | . | . | . | . | 100 | 100 |
| SAMN16197933.fasta | 100 | 99.84 | 100 | 100 | . | . | . | . | . | . | 100 | 100 |
| SAMN16197935.fasta | 100 | 99.84 | 100 | 100 | . | . | . | . | . | . | 100 | 100 |
| SAMN17981712.fasta | 100 | 99.84 | 100 | 100 | . | . | . | . | . | . | 100 | 100 |

|  | **21** | **22** | **23** | **24** | **25** | **26** | **27** | **28** | **29** | **30** | **31** | **32** | **33** | **34** | **35** | **36** | **37** |
| --- | --- | --- | --- | --- | --- | --- | --- | --- | --- | --- | --- | --- | --- | --- | --- | --- | --- |
| **#FILE** | **entA** | **entB** | **entC** | **entE** | **entF** | **entS** | **fepA** | **fepB** | **fepC** | **fepD** | **fepG** | **fes** | **fimA** | **fimB** | **fimC** | **fimD** | **fimE** |
| A1.fasta | 100 | 100 | 100 | 100 | 100 | 100 | 100 | 100 | 100 | 100 | 100 | 100 | 100 | 100 | 100 | 100 | 100 |
| GCA_002186705.1.fasta | 100 | 100 | 100 | 100 | 100 | 100 | 100 | 100 | 100 | 100 | 100 | 100 | 100 | 100 | 100 | 100 | 100 |
| GCA_002186945.1.fasta | 100 | 100 | 100 | 100 | 100 | 100 | 100 | 100 | 100 | 100 | 100 | 100 | 100 | 100 | 100 | 100 | 100 |
| GCA_002187375.1.fasta | 100 | 100 | 100 | 100 | 100 | 100 | 100 | 100 | 100 | 100 | 100 | 100 | 100 | 100 | 100 | 100 | 100 |
| GCA_002187715.1.fasta | 100 | 100 | 100 | 100 | 100 | 100 | 100 | 100 | 100 | 100 | 100 | 100 | 100 | 100 | 100 | 100 | 100 |
| GCA_002188235.1.fasta | 100 | 100 | 100 | 100 | 100 | 100 | 100 | 100 | 100 | 100 | 100 | 100 | 100 | 100 | 100 | 100 | 100 |
| GCA_003195295.1.fasta | 100 | 100 | 100 | 100 | 99.69 | 100 | 100 | 100 | 100 | 100 | 87.31 | 100 | 100 | 100 | 100 | 100 | 100 |
| GCA_014788765.1.fasta | 100 | 100 | 100 | 100 | 100 | 100 | 100 | 100 | 100 | 100 | 100 | 100 | 100 | 100 | 100 | 100 | 100 |
| GCA_015720195.1.fasta | 100 | 100 | 100 | 100 | 100 | 100 | 100 | 100 | 100 | 100 | 100 | 100 | 100 | 100 | 100 | 100 | 100 |
| GCA_021920105.1.fasta | 100 | 100 | 100 | 100 | 100 | 100 | 100 | 100 | 100 | 100 | 100 | 100 | 100 | 100 | 100 | 100 | 100 |
| GCA_021920885.1.fasta | 100 | 100 | 100 | 100 | 100 | 100 | 100 | 100 | 100 | 100 | 100 | 100 | 100 | 100 | 100 | 100 | 100 |
| GCA_021920985.1.fasta | 100 | 100 | 100 | 100 | 100 | 100 | 100 | 100 | 100 | 100 | 100 | 100 | 100 | 100 | 100 | 100 | 100 |
| GCA_021925685.1.fasta | 100 | 100 | 100 | 100 | 100 | 100 | 100 | 100 | 100 | 100 | 100 | 100 | 100 | 100 | 100 | 100 | 100 |
| GCA_021926845.1.fasta | 100 | 100 | 100 | 100 | 100 | 100 | 100 | 100 | 100 | 100 | 100 | 100 | 100 | 100 | 100 | 100 | 100 |
| GCA_021928295.1.fasta | 100 | 100 | 100 | 100 | 100 | 100 | 100 | 100 | 100 | 100 | 100 | 100 | 100 | 100 | 100 | 100 | 100 |
| GCA_021928995.1.fasta | 100 | 100 | 99.91 | 100 | 100 | 100 | 100 | 100 | 100 | 100 | 100 | 100 | 100 | 100 | 100 | 100 | 100 |
| GCA_021929455.1.fasta | 100 | 100 | 100 | 100 | 100 | 100 | 100 | 100 | 100 | 100 | 100 | 100 | 100 | 100 | 100 | 100 | 100 |
| GCA_021933415.1.fasta | 100 | 100 | 100 | 100 | 100 | 100 | 100 | 100 | 100 | 100 | 100 | 100 | 100 | 100 | 100 | 100 | 100 |
| GCA_021956765.1.fasta | 100 | 100 | 100 | 100 | 100 | 100 | 100 | 100 | 100 | 100 | 100 | 100 | 100 | 100 | 100 | 100 | 100 |
| GCA_021957705.1.fasta | 100 | 100 | 100 | 100 | 100 | 100 | 100 | 100 | 100 | 100 | 100 | 100 | 100 | 100 | 100 | 100 | 100 |
| GCA_022048705.1.fasta | 100 | 100 | 100 | 100 | 100 | 100 | 100 | 100 | 100 | 100 | 100 | 100 | 100 | 100 | 100 | 100 | 100 |
| GCA_022061125.1.fasta | 100 | 100 | 100 | 100 | 100 | 100 | 100 | 100 | 100 | 100 | 100 | 100 | 100 | 100 | 100 | 100 | 100 |
| GCA_022084535.1.fasta | 100 | 100 | 100 | 100 | 100 | 100 | 100 | 100 | 100 | 100 | 100 | 100 | 100 | 100 | 100 | 100 | 100 |
| GCA_022176145.1.fasta | 100 | 100 | 100 | 100 | 100 | 100 | 100 | 100 | 100 | 100 | 100 | 100 | 100 | 100 | 100 | 100 | 100 |
| GCA_022176185.1.fasta | 100 | 100 | 100 | 100 | 100 | 100 | 100 | 100 | 100 | 100 | 100 | 100 | 100 | 100 | 100 | 100 | 100 |
| GCA_022176205.1.fasta | 100 | 100 | 100 | 100 | 100 | 100 | 100 | 100 | 100 | 100 | 100 | 100 | 100 | 100 | 100 | 100 | 100 |
| GCA_022176585.1.fasta | 100 | 100 | 100 | 100 | 100 | 100 | 100 | 100 | 100 | 100 | 100 | 100 | 100 | 100 | 100 | 100 | 100 |
| GCA_022176645.1.fasta | 100 | 100 | 100 | 100 | 100 | 100 | 100 | 100 | 100 | 100 | 100 | 100 | 100 | 100 | 100 | 100 | 100 |
| GCA_022233245.1.fasta | 100 | 100 | 100 | 100 | 100 | 100 | 100 | 100 | 100 | 100 | 100 | 100 | 100 | 100 | 100 | 99.77 | 100 |
| GCA_022233305.1.fasta | 100 | 100 | 100 | 100 | 100 | 100 | 100 | 100 | 100 | 100 | 100 | 100 | 100 | 100 | 100 | 99.77 | 100 |
| GCA_022233405.1.fasta | 100 | 100 | 100 | 100 | 100 | 100 | 100 | 100 | 100 | 100 | 100 | 100 | 100 | 100 | 100 | 100 | 100 |
| GCA_022250515.1.fasta | 100 | 100 | 100 | 100 | 100 | 100 | 100 | 100 | 100 | 100 | 100 | 100 | 100 | 100 | 100 | 100 | 100 |
| GCA_022270255.1.fasta | 100 | 100 | 100 | 100 | 100 | 100 | 100 | 100 | 100 | 100 | 100 | 100 | 100 | 100 | 100 | 100 | 100 |
| GCA_022270275.1.fasta | 100 | 100 | 100 | 100 | 100 | 100 | 100 | 100 | 100 | 100 | 100 | 100 | 100 | 100 | 100 | 100 | 100 |
| GCA_022270495.1.fasta | 100 | 100 | 100 | 100 | 100 | 100 | 100 | 100 | 100 | 100 | 100 | 100 | 100 | 100 | 100 | 100 | 100 |
| GCA_022270575.1.fasta | 100 | 100 | 100 | 100 | 100 | 100 | 100 | 100 | 100 | 100 | 100 | 100 | 100 | 100 | 100 | 100 | 100 |
| GCA_022270615.1.fasta | 100 | 100 | 100 | 100 | 100 | 100 | 100 | 100 | 100 | 100 | 100 | 100 | 100 | 100 | 100 | 100 | 100 |
| GCA_022270695.1.fasta | 100 | 100 | 100 | 100 | 100 | 100 | 100 | 100 | 100 | 100 | 100 | 100 | 100 | 100 | 100 | 100 | 100 |
| GCA_024392555.1.fasta | . | . | . | . | . | . | . | . | . | . | . | . | 100 | 100 | 100 | 100 | 100 |
| GCA_024474865.1.fasta | 100 | 100 | 100 | 100 | 100 | 100 | 100 | 100 | 100 | 100 | 100 | 100 | 100 | 100 | 100 | 100 | 100 |
| GCA_025101225.1.fasta | 100 | 100 | 100 | 100 | 100 | 100 | 100 | 100 | 100 | 100 | 100 | 100 | 100 | 100 | 100 | 99.77 | 100 |
| GCA_026361275.1.fasta | 100 | 100 | 100 | 100 | 100 | 100 | 100 | 100 | 100 | 100 | 100 | 100 | 100 | 100 | 100 | 100 | 100 |
| GCA_030786325.1.fasta | 100 | 100 | 100 | 100 | 100 | 100 | 100 | 100 | 100 | 100 | 100 | 100 | . | . | . | . | . |
| GCA_030820975.1.fasta | 100 | 100 | 100 | 100 | 100 | 100 | 100 | 100 | 100 | 100 | 100 | 100 | 100 | 100 | 100 | 100 | 100 |
| GCA_032044555.1.fasta | 100 | 100 | 100 | 100 | 100 | 100 | 100 | 100 | 100 | 100 | 100 | 100 | 100 | 100 | 100 | 100 | 100 |
| GCA_032046295.1.fasta | 100 | 100 | 100 | 100 | 100 | 100 | 100 | 100 | 100 | 100 | 100 | 100 | 100 | 100 | 100 | 100 | 100 |
| GCA_032062785.1.fasta | 100 | 100 | 100 | 100 | 100 | 100 | 100 | 100 | 100 | 100 | 100 | 100 | 100 | 100 | 100 | 100 | 100 |
| GCA_032066125.1.fasta | 100 | 100 | 100 | 100 | 100 | 100 | 100 | 100 | 100 | 100 | 100 | 100 | 100 | 100 | 100 | 100 | 100 |
| GCA_032066145.1.fasta | 100 | 100 | 100 | 100 | 100 | 100 | 100 | 100 | 100 | 100 | 100 | 100 | 100 | 100 | 100 | 100 | 100 |
| GCA_032070585.1.fasta | 100 | 100 | 100 | 100 | 100 | 100 | 100 | 100 | 100 | 100 | 100 | 100 | 100 | 100 | 100 | 100 | . |
| GCA_032070965.1.fasta | 100 | 100 | 100 | 100 | 100 | 100 | 100 | 100 | 100 | 100 | 100 | 100 | 100 | 100 | 100 | 100 | 100 |
| GCA_032072835.1.fasta | 100 | 100 | 100 | 100 | 100 | 100 | 100 | 100 | 100 | 100 | 100 | 100 | 100 | 100 | 100 | 100 | 100 |
| GCA_032077145.1.fasta | 100 | 100 | 100 | 100 | 100 | 100 | 100 | 100 | 100 | 100 | 100 | 100 | 100 | 100 | 100 | 100 | 100 |
| GCA_032128025.1.fasta | 100 | 100 | 100 | 100 | 100 | 100 | 100 | 100 | 100 | 100 | 100 | 100 | 100 | 100 | 100 | 100 | 100 |
| GCA_032129715.1.fasta | 100 | 100 | 100 | 100 | 100 | 100 | 100 | 100 | 100 | 100 | 100 | 100 | 100 | 100 | 100 | 100 | 100 |
| GCA_032132495.1.fasta | 100 | 100 | 100 | 100 | 100 | 100 | 100 | 100 | 100 | 100 | 100 | 100 | 100 | 100 | 100 | 100 | 100 |
| GCA_032132835.1.fasta | 100 | 100 | 100 | 100 | 100 | 100 | 100 | 100 | 100 | 100 | 100 | 100 | 100 | 100 | 100 | 100 | 100 |
| GCA_032134135.1.fasta | 100 | 100 | 100 | 100 | 100 | 100 | 100 | 100 | 100 | 100 | 100 | 100 | 100 | 100 | 100 | 100 | 100 |
| GCA_032134975.1.fasta | 100 | 100 | 100 | 100 | 100 | 100 | 100 | 100 | 100 | 100 | 100 | 100 | 100 | 100 | 100 | 100 | 100 |
| GCA_032137635.1.fasta | 100 | 100 | 100 | 100 | 100 | 100 | 100 | 100 | 100 | 100 | 100 | 100 | 100 | 100 | 100 | 100 | 100 |
| GCA_032153315.1.fasta | 100 | 100 | 100 | 100 | 100 | 100 | 100 | 100 | 100 | 100 | 100 | 100 | 100 | 100 | 100 | 100 | 100 |
| GCA_032155885.1.fasta | 100 | 100 | 100 | 100 | 100 | 100 | 100 | 100 | 100 | 100 | 100 | 100 | 100 | 100 | 100 | 100 | 100 |
| GCA_032411785.1.fasta | 100 | 100 | 100 | 100 | 100 | 100 | 100 | 100 | 100 | 100 | 100 | 100 | 100 | 100 | 100 | 100 | 100 |
| GCA_033106885.1.fasta | 100 | 100 | 100 | 100 | 100 | 100 | 100 | 100 | 100 | 100 | 100 | 100 | 100 | 100 | 100 | 100 | 100 |
| GCA_033107445.1.fasta | 100 | 100 | 100 | 100 | 100 | 100 | 100 | 100 | 100 | 100 | 100 | 100 | 100 | 100 | 100 | 100 | 100 |
| GCA_033108425.1.fasta | 100 | 100 | 100 | 100 | . | 100 | 100 | 100 | 100 | 100 | 100 | 100 | 100 | 100 | 100 | 99.77 | 100 |
| GCA_033122545.1.fasta | 100 | 100 | 100 | 100 | 100 | 100 | 100 | 100 | 100 | 100 | 100 | 100 | 100 | 100 | 100 | 100 | 100 |
| GCA_900181095.1.fasta | 100 | 100 | 100 | 100 | 100 | 100 | 100 | 100 | 100 | 100 | 100 | 100 | 100 | 100 | 100 | 99.92 | 100 |
| GCA_900502575.1.fasta | 100 | 100 | 100 | 100 | 100 | 100 | 100 | 100 | 100 | 100 | 100 | 100 | 100 | 100 | 100 | 100 | 100 |
| GCA_900503265.1.fasta | 100 | 100 | 100 | 100 | 100 | 100 | 100 | 100 | 100 | 100 | 100 | 100 | 100 | 100 | 100 | 100 | 100 |
| GCA_900504655.1.fasta | 100 | 100 | 100 | 100 | 100 | 100 | 100 | 100 | 100 | 100 | 100 | 100 | 100 | 100 | 100 | 100 | 100 |
| GCA_900504955.1.fasta | 100 | 100 | 100 | 100 | 100 | 100 | 100 | 100 | 100 | 100 | 100 | 100 | 100 | 100 | 100 | 100 | 100 |
| GCA_900506745.1.fasta | 100 | 100 | 100 | 100 | 100 | 100 | 100 | 100 | 100 | 100 | 100 | 100 | 100 | 100 | 100 | 100 | 100 |
| GCA_900512545.1.fasta | 100 | 100 | 100 | 100 | 100 | 100 | 100 | 100 | 100 | 100 | 100 | 100 | 100 | 100 | 100 | 100 | 100 |
| GCF_021441845.1.fasta | 100 | 100 | 100 | 100 | 100 | 100 | 100 | 100 | 100 | 100 | 100 | 100 | 100 | 100 | 100 | 100 | 100 |
| GCF_024495065.1.fasta | 100 | 100 | 100 | 100 | 100 | 100 | 100 | 100 | 100 | 100 | 100 | 100 | 100 | 100 | 100 | 100 | 100 |
| GCF_024495515.1.fasta | 100 | 100 | 100 | 100 | 100 | 100 | 100 | 100 | 100 | 100 | 100 | 100 | 100 | 100 | 100 | 100 | 100 |
| SAMEA113605448.fasta | 100 | 100 | 100 | 100 | 100 | 100 | 100 | 100 | 100 | 100 | 100 | 100 | 100 | 100 | 100 | 100 | 92.12 |
| SAMEA113605746.fasta | 100 | 100 | 100 | 100 | . | 100 | 100 | 100 | 100 | 100 | 89.63 | 100 | 100 | 100 | 100 | 100 | 100 |
| SAMEA2052930.fasta | 100 | 100 | 100 | 100 | 100 | 100 | 100 | 100 | 100 | 100 | 100 | 100 | 100 | 100 | 100 | 100 | 100 |
| SAMEA2633723.fasta | 100 | 100 | 100 | 100 | 100 | 100 | 100 | 100 | 100 | 100 | 100 | 100 | 100 | 100 | 100 | 100 | 100 |
| SAMEA3281566.fasta | 100 | 100 | 100 | 100 | 100 | 100 | 100 | 100 | 100 | 100 | 100 | 100 | 100 | 100 | 100 | 99.77 | 100 |
| SAMEA5758680.fasta | 100 | 100 | 100 | 100 | 100 | 100 | 100 | 100 | 100 | 100 | 100 | 100 | 100 | 100 | 100 | 100 | 100 |
| SAMEA6155812.fasta | 100 | 100 | 100 | 100 | 100 | 100 | 100 | 100 | 100 | 100 | 100 | 100 | 100 | 100 | 100 | 100 | 100 |
| SAMEA6155829.fasta | 100 | 100 | 100 | 100 | 100 | 100 | 100 | 100 | 100 | 100 | 100 | 100 | 100 | 100 | 100 | 100 | 100 |
| SAMEA6155886.fasta | 100 | 100 | 100 | 100 | 100 | 100 | 100 | 100 | 100 | 100 | 100 | 100 | 100 | 100 | 100 | 100 | 100 |
| SAMEA6156048.fasta | 100 | 100 | 100 | 100 | 100 | 100 | 100 | 100 | 100 | 100 | 100 | 100 | 100 | 100 | 100 | 100 | 100 |
| SAMEA6375606.fasta | 100 | 100 | 100 | 100 | 100 | 100 | 100 | 100 | 100 | 100 | 100 | 100 | 100 | 100 | 100 | 100 | 100 |
| SAMEA6635864.fasta | 100 | 100 | 100 | 100 | 100 | 100 | 100 | 100 | 100 | 100 | 100 | 100 | 100 | 100 | 100 | 100 | 100 |
| SAMEA6654214.fasta | 100 | 100 | 100 | 100 | 100 | 100 | 100 | 100 | 100 | 100 | 100 | 100 | 100 | 100 | 100 | 100 | 100 |
| SAMEA6654216.fasta | 100 | 100 | 100 | 100 | 100 | 100 | 100 | 100 | 100 | 100 | 100 | 100 | 100 | 100 | 100 | 100 | 100 |
| SAMEA6654217.fasta | 100 | 100 | 100 | 100 | 100 | 100 | 100 | 100 | 100 | 100 | 100 | 100 | 100 | 100 | 100 | 100 | 100 |
| SAMEA6654218.fasta | 100 | 100 | 100 | 100 | 100 | 100 | 99.96 | 100 | 100 | 100 | 100 | 100 | 100 | 100 | 100 | 100 | 100 |
| SAMEA7472332.fasta | 100 | 100 | 100 | 100 | 100 | 100 | 100 | 100 | 100 | 100 | 100 | 100 | 100 | 100 | 100 | 99.92 | 100 |
| SAMEA7472348.fasta | 100 | 100 | 100 | 100 | 100 | 100 | 100 | 100 | 100 | 100 | 100 | 100 | 100 | 100 | 100 | 100 | 100 |
| SAMN16197932.fasta | 100 | 100 | 100 | 100 | 100 | 100 | 100 | 100 | 100 | 100 | 100 | 100 | 100 | 100 | 100 | 100 | 100 |
| SAMN16197933.fasta | 100 | 100 | 100 | 100 | 100 | 100 | 100 | 100 | 100 | 100 | 100 | 100 | 100 | 100 | 100 | 100 | 100 |
| SAMN16197935.fasta | 100 | 100 | 100 | 100 | 100 | 100 | 100 | 100 | 100 | 100 | 100 | 100 | 100 | 100 | 100 | 100 | 100 |
| SAMN17981712.fasta | 100 | 100 | 100 | 100 | 100 | 100 | 100 | 100 | 100 | 100 | 100 | 100 | 100 | 100 | 100 | 100 | 100 |

|  | **38** | **39** | **40** | **41** | **42** | **43** | **44** | **45** | **46** | **47** | **48** | **49** | **50** |
| --- | --- | --- | --- | --- | --- | --- | --- | --- | --- | --- | --- | --- | --- |
| **#FILE** | **fimF** | **fimG** | **fimH** | **fimI** | **fimK** | **fur** | **fyuA** | **fyuA/psn** | **galF** | **gndA** | **hcp/tssD** | **icmF/tssM** | **iroB** |
| A1.fasta | 100 | 100 | 100 | 100 | 100 | 96.47 | . | 100 | 100 | 100 | 100 | 89.12 | 100 |
| GCA_002186705.1.fasta | 100 | 100 | 100 | 100 | 100 | 96.47 | . | . | 100 | 100 | 100 | 89.12 | . |
| GCA_002186945.1.fasta | 100 | 100 | 100 | 100 | 100 | 96.47 | . | . | 100 | 100 | 100 | 89.12 | . |
| GCA_002187375.1.fasta | 100 | 100 | 100 | 100 | 100 | 96.47 | . | . | 100 | 100 | 100 | 89.12 | . |
| GCA_002187715.1.fasta | 100 | 100 | 100 | 100 | 100 | 96.47 | . | 100 | 100 | 100 | 100 | 89.12 | . |
| GCA_002188235.1.fasta | 100 | 100 | 100 | 100 | 100 | 96.47 | . | 100 | 100 | 100 | 100 | 89.12 | . |
| GCA_003195295.1.fasta | 100 | 100 | 100 | 100 | 100 | 96.47 | . | 100 | 100 | 100 | 100 | 89.12 | . |
| GCA_014788765.1.fasta | 100 | 100 | 100 | 100 | 100 | 96.47 | . | 100 | 100 | 100 | 100 | 89.12 | . |
| GCA_015720195.1.fasta | 100 | 100 | 100 | 100 | 100 | 96.47 | . | 100 | 100 | 100 | 100 | 89.12 | . |
| GCA_021920105.1.fasta | 100 | 100 | 100 | 100 | 100 | 96.47 | 100 | . | 100 | 100 | 100 | 89.12 | . |
| GCA_021920885.1.fasta | 100 | 100 | 100 | 100 | 100 | 96.47 | . | 100 | 100 | 100 | 100 | 89.12 | . |
| GCA_021920985.1.fasta | 100 | 100 | 100 | 100 | 100 | 96.47 | . | 100 | 100 | 100 | 100 | 89.12 | . |
| GCA_021925685.1.fasta | 100 | 100 | 100 | 100 | 100 | 96.47 | . | 100 | 100 | 100 | 100 | 89.12 | . |
| GCA_021926845.1.fasta | 100 | 100 | 100 | 100 | 100 | 96.47 | . | 100 | 100 | 100 | 100 | 89.12 | . |
| GCA_021928295.1.fasta | 100 | 100 | 100 | 100 | 100 | 96.47 | . | 100 | 100 | 100 | 100 | 89.12 | . |
| GCA_021928995.1.fasta | 100 | 100 | 100 | 100 | 100 | 96.47 | . | 100 | 100 | 100 | 100 | 89.12 | . |
| GCA_021929455.1.fasta | 100 | 100 | 100 | 100 | 100 | 96.47 | . | 100 | 100 | 100 | 100 | 89.12 | . |
| GCA_021933415.1.fasta | 100 | 100 | 100 | 100 | 100 | 96.47 | . | . | 100 | 100 | 100 | 89.12 | 100 |
| GCA_021956765.1.fasta | 100 | 100 | 100 | 100 | 100 | 96.47 | . | . | 100 | 100 | 100 | 89.12 | . |
| GCA_021957705.1.fasta | 100 | 100 | 100 | 100 | 100 | 96.47 | . | 100 | 100 | 100 | 100 | 89.12 | . |
| GCA_022048705.1.fasta | 100 | 100 | 100 | 100 | 100 | 96.47 | . | . | 100 | 100 | 100 | 89.12 | . |
| GCA_022061125.1.fasta | 100 | 100 | 100 | 100 | 100 | 96.47 | . | 100 | 100 | 100 | 100 | 89.12 | . |
| GCA_022084535.1.fasta | 100 | 100 | 100 | 100 | 100 | 96.47 | . | 100 | 100 | 100 | 100 | 89.12 | . |
| GCA_022176145.1.fasta | 100 | 100 | 100 | 100 | 100 | 96.47 | . | 100 | 100 | 100 | 100 | 89.12 | . |
| GCA_022176185.1.fasta | 100 | 100 | 100 | 100 | 100 | 96.47 | . | 100 | 100 | 100 | 100 | 89.12 | . |
| GCA_022176205.1.fasta | 100 | 100 | 100 | 100 | 100 | 96.47 | . | 100 | 100 | 100 | 100 | 89.12 | . |
| GCA_022176585.1.fasta | 100 | 100 | 100 | 100 | 100 | 96.47 | . | 100 | 100 | 100 | 100 | 89.12 | . |
| GCA_022176645.1.fasta | 100 | 100 | 100 | 100 | 100 | 96.47 | . | 100 | 100 | 100 | 100 | 89.12 | . |
| GCA_022233245.1.fasta | 100 | 100 | 100 | 100 | 100 | 96.47 | 100 | . | 100 | 100 | 100 | 89.12 | 100 |
| GCA_022233305.1.fasta | 100 | 100 | 100 | 100 | 100 | 96.47 | 100 | . | 100 | 100 | 100 | 89.12 | 100 |
| GCA_022233405.1.fasta | 100 | 100 | 100 | 100 | 100 | 96.47 | . | . | 100 | 100 | 100 | 89.09 | 100 |
| GCA_022250515.1.fasta | 100 | 100 | 100 | 100 | 100 | 96.47 | . | . | 100 | 100 | 100 | . | . |
| GCA_022270255.1.fasta | 100 | 100 | 100 | 100 | 100 | 96.47 | . | 100 | 100 | 100 | 100 | 89.12 | . |
| GCA_022270275.1.fasta | 100 | 100 | 100 | 100 | 100 | 96.47 | . | 100 | 100 | 100 | 100 | 89.12 | . |
| GCA_022270495.1.fasta | 100 | 100 | 100 | 100 | 100 | 96.47 | . | 100 | 100 | 100 | 100 | 89.12 | . |
| GCA_022270575.1.fasta | 100 | 100 | 100 | 100 | 100 | 96.47 | . | 100 | 100 | 100 | 100 | 89.12 | . |
| GCA_022270615.1.fasta | 100 | 100 | 100 | 100 | 100 | 96.47 | . | 100 | 100 | 100 | 100 | 89.12 | . |
| GCA_022270695.1.fasta | 100 | 100 | 100 | 100 | 100 | 96.47 | . | 100 | 100 | 100 | 100 | 89.12 | . |
| GCA_024392555.1.fasta | 100 | 100 | 100 | 100 | 100 | 96.47 | . | 100 | 100 | 100 | 100 | 89.12 | . |
| GCA_024474865.1.fasta | 100 | 100 | 100 | 100 | 100 | 96.47 | . | . | 100 | 100 | 100 | 89.12 | . |
| GCA_025101225.1.fasta | 100 | 100 | 100 | 100 | 100 | 96.47 | 100 | . | 100 | 100 | 100 | 89.12 | 100 |
| GCA_026361275.1.fasta | 100 | 100 | 100 | 100 | 100 | 96.47 | . | 100 | 100 | 100 | 100 | 89.12 | . |
| GCA_030786325.1.fasta | . | . | . | . | . | 96.47 | . | 100 | 100 | 100 | 100 | 89.12 | . |
| GCA_030820975.1.fasta | 100 | 100 | 100 | 100 | 100 | 96.47 | . | 100 | 100 | 100 | 100 | 89.12 | . |
| GCA_032044555.1.fasta | 100 | 100 | 100 | 100 | 100 | 96.47 | . | . | 100 | 100 | 100 | 89.09 | 100 |
| GCA_032046295.1.fasta | 100 | 100 | 100 | 100 | 100 | 96.47 | . | 100 | 100 | 100 | 100 | 89.12 | . |
| GCA_032062785.1.fasta | 100 | 100 | 100 | 100 | 100 | 96.47 | . | 100 | 100 | 100 | 100 | 89.12 | . |
| GCA_032066125.1.fasta | 100 | 100 | 100 | 100 | 100 | 96.47 | . | 100 | 100 | 100 | 100 | 89.12 | . |
| GCA_032066145.1.fasta | 100 | 100 | 100 | 100 | 100 | 96.47 | . | 100 | 100 | 100 | 100 | 89.12 | . |
| GCA_032070585.1.fasta | 100 | 100 | 100 | 100 | 100 | 96.47 | . | 100 | 100 | 100 | 100 | 89.12 | . |
| GCA_032070965.1.fasta | 100 | 100 | 100 | 100 | 100 | 96.47 | . | 100 | 100 | 100 | 100 | 89.12 | . |
| GCA_032072835.1.fasta | 100 | 100 | 100 | 100 | 100 | 96.47 | . | 100 | 100 | 100 | 100 | 89.12 | . |
| GCA_032077145.1.fasta | 100 | 100 | 100 | 100 | 100 | 96.47 | . | 100 | 100 | 100 | 100 | 89.12 | . |
| GCA_032128025.1.fasta | 100 | 100 | 100 | 100 | 100 | 96.47 | . | . | 100 | 100 | 100 | 89.12 | 100 |
| GCA_032129715.1.fasta | 100 | 100 | 100 | 100 | 100 | 96.47 | . | 100 | 100 | 100 | 100 | 89.12 | . |
| GCA_032132495.1.fasta | 100 | 100 | 100 | 100 | 100 | 96.47 | . | 100 | 100 | 100 | 100 | 89.12 | . |
| GCA_032132835.1.fasta | 100 | 97.94 | 100 | 100 | 100 | 96.47 | . | 100 | 100 | 100 | 100 | 89.12 | . |
| GCA_032134135.1.fasta | 100 | 100 | 100 | 100 | 100 | 96.47 | . | 100 | 100 | 100 | 100 | 89.12 | . |
| GCA_032134975.1.fasta | 100 | 100 | 100 | 100 | 100 | 96.47 | . | 100 | 100 | 100 | 100 | 89.12 | . |
| GCA_032137635.1.fasta | 100 | 100 | 100 | 100 | 100 | 96.47 | . | 100 | 100 | 100 | 100 | 89.12 | . |
| GCA_032153315.1.fasta | 100 | 100 | 100 | 100 | 100 | 96.47 | . | 100 | 100 | 100 | 100 | 89.12 | . |
| GCA_032155885.1.fasta | 100 | 100 | 100 | 100 | 100 | 96.47 | . | 100 | 100 | 100 | 100 | 89.12 | . |
| GCA_032411785.1.fasta | 100 | 100 | 100 | 100 | 100 | 96.47 | . | 100 | 100 | 100 | 100 | 89.12 | . |
| GCA_033106885.1.fasta | 100 | 100 | 100 | 100 | 100 | 96.47 | . | . | 100 | 100 | 100 | 89.12 | 100 |
| GCA_033107445.1.fasta | 100 | 100 | 100 | 100 | 100 | 96.47 | . | . | 100 | 100 | 100 | 89.09 | 100 |
| GCA_033108425.1.fasta | 100 | 100 | 100 | 100 | 100 | 96.47 | 100 | . | 100 | 100 | 100 | 89.12 | 100 |
| GCA_033122545.1.fasta | 100 | 100 | 100 | 100 | 100 | 96.47 | . | 100 | 100 | 100 | 99.8 | 89.12 | . |
| GCA_900181095.1.fasta | 100 | 100 | 100 | 100 | 100 | 96.47 | . | . | 100 | 100 | 100 | 89.12 | . |
| GCA_900502575.1.fasta | 100 | 100 | 100 | 100 | 100 | 96.47 | . | 100 | 100 | 100 | 100 | 89.12 | . |
| GCA_900503265.1.fasta | 100 | 100 | 100 | 100 | 100 | 96.47 | . | . | 100 | 100 | 100 | 89.12 | . |
| GCA_900504655.1.fasta | 100 | 100 | 100 | 100 | 100 | 96.47 | . | . | 100 | 100 | 100 | 89.12 | . |
| GCA_900504955.1.fasta | 100 | 100 | 100 | 100 | 100 | 96.47 | . | 100 | 100 | 100 | 100 | 89.12 | . |
| GCA_900506745.1.fasta | 100 | 100 | 100 | 100 | 100 | 96.47 | . | 100 | 100 | 100 | 100 | 89.12 | . |
| GCA_900512545.1.fasta | 100 | 100 | 100 | 100 | 100 | 96.47 | . | 100 | 100 | 100 | 100 | 89.12 | . |
| GCF_021441845.1.fasta | 100 | 100 | 100 | 100 | 100 | 96.47 | . | . | 100 | 100 | 100 | 89.12 | . |
| GCF_024495065.1.fasta | 100 | 100 | 100 | 100 | 100 | 96.47 | . | . | 100 | 100 | 100 | 89.12 | . |
| GCF_024495515.1.fasta | 100 | 100 | 100 | 100 | 100 | 96.47 | . | . | 100 | 100 | 100 | 89.12 | . |
| SAMEA113605448.fasta | 100 | 100 | 100 | 100 | 100 | 96.47 | . | 100 | 100 | 100 | 100 | 89.12 | . |
| SAMEA113605746.fasta | 100 | 100 | 100 | 100 | 100 | 96.47 | . | 100 | . | 100 | 100 | 89.12 | . |
| SAMEA2052930.fasta | 100 | 100 | 100 | 100 | 100 | 96.47 | . | 100 | 100 | 100 | 100 | 89.12 | . |
| SAMEA2633723.fasta | 100 | 100 | 100 | 100 | 100 | 96.47 | . | . | 100 | 100 | 100 | 89.12 | 100 |
| SAMEA3281566.fasta | 100 | 100 | 100 | 100 | 100 | 96.47 | . | . | 100 | 100 | 100 | 89.12 | . |
| SAMEA5758680.fasta | 100 | 100 | 100 | 100 | 100 | 96.47 | . | 100 | 100 | 100 | 100 | 89.12 | . |
| SAMEA6155812.fasta | 100 | 100 | 100 | 100 | 100 | 96.47 | . | 100 | 100 | 100 | 100 | 89.12 | . |
| SAMEA6155829.fasta | 100 | 100 | 100 | 100 | 100 | 96.47 | . | 100 | 100 | 100 | 100 | 89.12 | . |
| SAMEA6155886.fasta | 100 | 100 | 100 | 100 | 100 | 96.47 | . | 100 | 100 | 100 | 100 | 89.12 | . |
| SAMEA6156048.fasta | 100 | 100 | 100 | 100 | 100 | 96.47 | . | 100 | 100 | 100 | 100 | 89.12 | . |
| SAMEA6375606.fasta | 100 | 100 | 100 | 100 | 100 | 96.47 | . | . | 100 | 100 | 100 | 89.12 | . |
| SAMEA6635864.fasta | 100 | 100 | 100 | 100 | 100 | 96.47 | . | 100 | 100 | 100 | 100 | 89.12 | . |
| SAMEA6654214.fasta | 100 | 100 | 100 | 100 | 100 | 96.47 | . | 100 | 100 | 100 | 100 | 89.12 | . |
| SAMEA6654216.fasta | 100 | 100 | 100 | 100 | 100 | 96.47 | . | 100 | 100 | 100 | 100 | 89.12 | . |
| SAMEA6654217.fasta | 100 | 100 | 100 | 100 | 100 | 96.47 | . | 100 | 100 | 100 | 100 | 89.12 | . |
| SAMEA6654218.fasta | 100 | 100 | 100 | 100 | 100 | 96.47 | . | 100 | 100 | 100 | 100 | 89.12 | . |
| SAMEA7472332.fasta | 100 | 100 | 100 | 100 | 100 | 96.47 | . | . | 100 | 100 | 100 | 89.12 | . |
| SAMEA7472348.fasta | 100 | 100 | 100 | 100 | 100 | 96.47 | . | 100 | 100 | 100 | 100 | 89.12 | . |
| SAMN16197932.fasta | 100 | 100 | 100 | 100 | 100 | 96.47 | . | 100 | 100 | 100 | 100 | 89.12 | . |
| SAMN16197933.fasta | 100 | 100 | 100 | 100 | 100 | 96.47 | . | 100 | 100 | 100 | 100 | 89.12 | . |
| SAMN16197935.fasta | 100 | 100 | 100 | 100 | 100 | 96.47 | . | 100 | 100 | 100 | 100 | 89.12 | . |
| SAMN17981712.fasta | 100 | 100 | 100 | 100 | 100 | 96.47 | . | . | 100 | 100 | 100 | 89.12 | . |

|  | **51** | **52** | **53** | **54** | **55** | **56** | **57** | **58** | **59** | **60** | **61** | **62** | **63** | **64** | **65** |
| --- | --- | --- | --- | --- | --- | --- | --- | --- | --- | --- | --- | --- | --- | --- | --- |
| **#FILE** | **iroC** | **iroD** | **iroE** | **iroN** | **irp1** | **irp2** | **iucA** | **iucB** | **iucC** | **iucD** | **iutA** | **mrkA** | **mrkB** | **mrkC** | **mrkD** |
| A1.fasta | 100 | 100 | 100 | 100 | 100 | 100 | . | . | . | . | 100 | 100 | 100 | 100 | 100 |
| GCA_002186705.1.fasta | . | . | 100 | . | . | . | . | . | . | . | 100 | 100 | 100 | 100 | 100 |
| GCA_002186945.1.fasta | . | . | 100 | . | . | . | . | . | . | . | 100 | 100 | 100 | 100 | 100 |
| GCA_002187375.1.fasta | . | . | 100 | . | . | . | . | . | . | . | 100 | 100 | 100 | 100 | 100 |
| GCA_002187715.1.fasta | . | . | 100 | . | 100 | 100 | . | . | . | . | 100 | 100 | 100 | 100 | 100 |
| GCA_002188235.1.fasta | . | . | 100 | . | 100 | 100 | . | . | . | . | 100 | 100 | 100 | 100 | 100 |
| GCA_003195295.1.fasta | . | . | 100 | . | 100 | 100 | . | . | . | . | 100 | 100 | 100 | 100 | 100 |
| GCA_014788765.1.fasta | . | . | 100 | . | 100 | 100 | . | . | . | . | 100 | 100 | 100 | 100 | 100 |
| GCA_015720195.1.fasta | . | . | 100 | . | 100 | 100 | . | . | . | . | 100 | 100 | 100 | 100 | 100 |
| GCA_021920105.1.fasta | . | . | 100 | . | 100 | 100 | . | . | . | . | 100 | 100 | 100 | 100 | 100 |
| GCA_021920885.1.fasta | . | . | 100 | . | 100 | 100 | . | . | . | . | 100 | 100 | 100 | 100 | 100 |
| GCA_021920985.1.fasta | . | . | 100 | . | 100 | 100 | . | . | . | . | 100 | 100 | 100 | 100 | 100 |
| GCA_021925685.1.fasta | . | . | 100 | . | 100 | 100 | . | . | . | . | 100 | 100 | 100 | 100 | 100 |
| GCA_021926845.1.fasta | . | . | 100 | . | 100 | 100 | . | . | . | . | 100 | 100 | 100 | 100 | 100 |
| GCA_021928295.1.fasta | . | . | 100 | . | 100 | 100 | . | . | . | . | 100 | 100 | 100 | 100 | 100 |
| GCA_021928995.1.fasta | . | . | 100 | . | 100 | 100 | . | . | . | . | 100 | 100 | 100 | 100 | 100 |
| GCA_021929455.1.fasta | . | . | 100 | . | 100 | 100 | . | . | . | . | 100 | 100 | 100 | 100 | 100 |
| GCA_021933415.1.fasta | 100 | 100 | 100 | 100 | . | . | 100 | 100 | 100 | 100 | 100 | 100 | 100 | 100 | 100 |
| GCA_021956765.1.fasta | . | . | 100 | . | . | . | . | . | . | . | 100 | 100 | 100 | 100 | 100 |
| GCA_021957705.1.fasta | . | . | 100 | . | 100 | 100 | . | . | . | . | 100 | 100 | 100 | 100 | 100 |
| GCA_022048705.1.fasta | . | . | 100 | . | . | . | . | . | . | . | 100 | 100 | 100 | 100 | 100 |
| GCA_022061125.1.fasta | . | . | 100 | . | 100 | 100 | . | . | . | . | 100 | 100 | 100 | 100 | 100 |
| GCA_022084535.1.fasta | . | . | 100 | . | 100 | 100 | . | . | . | . | 100 | 100 | 100 | 100 | 100 |
| GCA_022176145.1.fasta | . | . | 100 | . | 100 | 100 | . | . | . | . | 100 | 100 | 100 | 100 | 100 |
| GCA_022176185.1.fasta | . | . | 100 | . | 100 | 100 | . | . | . | . | 100 | 100 | 100 | 100 | 100 |
| GCA_022176205.1.fasta | . | . | 100 | . | 100 | 100 | . | . | . | . | 100 | 100 | 100 | 100 | 100 |
| GCA_022176585.1.fasta | . | . | 100 | . | 100 | 100 | . | . | . | . | 100 | 100 | 100 | 100 | 100 |
| GCA_022176645.1.fasta | . | . | 100 | . | 100 | 100 | . | . | . | . | 100 | 100 | 100 | 100 | 100 |
| GCA_022233245.1.fasta | 100 | 100 | 100 | 100 | 100 | 100 | 100 | 100 | 100 | 99.61 | 100 | 100 | 100 | 100 | 100 |
| GCA_022233305.1.fasta | 100 | 100 | 100 | 100 | 100 | 100 | 100 | 100 | 100 | 99.61 | 100 | 100 | 100 | 100 | 100 |
| GCA_022233405.1.fasta | 100 | 100 | 100 | 100 | . | . | 100 | 100 | 100 | 100 | 100 | 100 | 100 | 100 | 100 |
| GCA_022250515.1.fasta | . | . | 100 | . | . | . | 100 | 100 | 100 | 99.61 | 100 | 100 | 100 | 100 | 100 |
| GCA_022270255.1.fasta | . | . | 100 | . | 100 | 100 | . | . | . | . | 100 | 100 | 100 | 100 | 100 |
| GCA_022270275.1.fasta | . | . | 100 | . | 100 | 100 | . | . | . | . | 100 | 100 | 100 | 100 | 100 |
| GCA_022270495.1.fasta | . | . | 100 | . | 100 | 100 | . | . | . | . | 100 | 100 | 100 | 100 | 100 |
| GCA_022270575.1.fasta | . | . | 100 | . | 100 | 100 | . | . | . | . | 100 | 100 | 100 | 100 | 100 |
| GCA_022270615.1.fasta | . | . | 100 | . | 100 | 100 | . | . | . | . | 100 | 100 | 100 | 100 | 100 |
| GCA_022270695.1.fasta | . | . | 100 | . | 100 | 100 | . | . | . | . | 100 | 100 | 100 | 100 | 100 |
| GCA_024392555.1.fasta | . | . | 100 | . | 100 | 100 | . | . | . | . | 100 | . | 100 | 100 | 100 |
| GCA_024474865.1.fasta | . | . | 100 | . | . | . | . | . | . | . | 100 | 100 | 100 | 100 | 100 |
| GCA_025101225.1.fasta | 100 | 100 | 100 | 100 | 100 | 100 | 100 | 100 | 100 | 99.61 | 100 | 100 | 100 | 100 | 100 |
| GCA_026361275.1.fasta | . | . | 100 | . | 100 | 100 | . | . | . | . | 100 | 100 | 100 | 100 | 100 |
| GCA_030786325.1.fasta | . | . | 100 | . | 100 | 83.91 | . | . | . | . | 100 | 100 | 100 | 100 | 100 |
| GCA_030820975.1.fasta | . | . | 100 | . | 100 | 100 | . | . | . | . | 100 | 100 | 100 | 100 | 100 |
| GCA_032044555.1.fasta | 100 | 100 | 100 | 100 | 100 | 100 | 100 | 100 | 100 | 100 | 100 | 100 | 100 | 100 | 100 |
| GCA_032046295.1.fasta | . | . | 100 | . | 100 | 100 | . | . | . | . | 100 | 100 | 100 | 100 | 100 |
| GCA_032062785.1.fasta | . | . | 100 | . | 100 | 100 | . | . | . | . | 100 | 100 | 100 | 100 | 100 |
| GCA_032066125.1.fasta | . | . | 100 | . | 100 | 100 | . | . | . | . | 100 | 100 | 100 | 100 | 100 |
| GCA_032066145.1.fasta | . | . | 100 | . | 100 | 100 | . | . | . | . | 100 | 100 | 100 | 100 | 100 |
| GCA_032070585.1.fasta | . | . | 100 | . | 100 | 100 | . | . | . | . | 100 | 100 | 100 | 100 | 100 |
| GCA_032070965.1.fasta | . | . | 100 | . | 100 | 100 | . | . | . | . | 100 | 100 | 100 | 100 | 100 |
| GCA_032072835.1.fasta | . | . | 100 | . | 100 | 100 | . | . | . | . | 100 | 100 | 100 | 100 | 100 |
| GCA_032077145.1.fasta | . | . | 100 | . | 100 | 100 | . | . | . | . | 100 | 100 | 100 | 100 | 100 |
| GCA_032128025.1.fasta | 100 | 100 | 100 | 100 | . | . | 100 | 100 | 100 | 100 | 100 | 100 | 100 | 100 | 100 |
| GCA_032129715.1.fasta | . | . | 100 | . | 100 | 100 | . | . | . | . | 100 | 100 | 100 | 100 | 100 |
| GCA_032132495.1.fasta | . | . | 100 | . | 100 | 100 | . | . | . | . | 100 | 100 | 100 | 100 | 100 |
| GCA_032132835.1.fasta | . | . | 100 | . | 100 | 100 | . | . | . | . | 100 | 100 | 100 | 100 | 100 |
| GCA_032134135.1.fasta | . | . | 100 | . | 91.19 | 100 | . | . | . | . | 100 | 100 | 100 | 100 | 100 |
| GCA_032134975.1.fasta | . | . | 100 | . | 100 | 100 | . | . | . | . | 100 | 100 | 100 | 100 | 100 |
| GCA_032137635.1.fasta | . | . | 100 | . | 100 | 100 | . | . | . | . | 100 | 100 | 100 | 100 | 100 |
| GCA_032153315.1.fasta | . | . | 100 | . | 100 | 100 | . | . | . | . | 100 | 100 | 100 | 100 | 100 |
| GCA_032155885.1.fasta | . | . | 100 | . | 100 | 100 | . | . | . | . | 100 | 100 | 100 | 100 | 100 |
| GCA_032411785.1.fasta | . | . | 100 | . | 100 | 100 | . | . | . | . | 100 | 100 | 100 | 100 | 100 |
| GCA_033106885.1.fasta | 100 | 100 | 100 | 100 | . | . | 100 | 100 | 100 | 100 | 100 | 100 | 100 | 100 | 100 |
| GCA_033107445.1.fasta | 100 | 100 | 100 | 100 | . | . | 100 | 100 | 100 | 100 | 100 | 100 | 100 | 100 | 100 |
| GCA_033108425.1.fasta | 100 | 100 | 100 | 100 | . | 100 | 100 | 100 | 100 | 99.61 | 99.09 | 100 | 100 | . | 100 |
| GCA_033122545.1.fasta | . | . | 100 | . | 100 | 100 | . | . | . | . | 100 | 100 | 100 | 100 | 100 |
| GCA_900181095.1.fasta | . | . | 100 | . | . | . | . | . | . | . | 100 | 100 | 100 | 100 | 100 |
| GCA_900502575.1.fasta | . | . | 100 | . | 100 | 100 | . | . | . | . | 100 | 100 | 100 | 100 | 100 |
| GCA_900503265.1.fasta | . | . | 100 | . | . | . | . | . | . | . | 100 | 100 | 100 | 100 | 100 |
| GCA_900504655.1.fasta | . | . | 100 | . | . | . | . | . | . | . | 100 | 100 | 100 | 100 | 100 |
| GCA_900504955.1.fasta | . | . | 100 | . | 100 | 100 | . | . | . | . | 100 | 100 | 100 | 100 | 100 |
| GCA_900506745.1.fasta | . | . | 100 | . | 100 | 100 | . | . | . | . | 100 | 100 | 100 | 100 | 100 |
| GCA_900512545.1.fasta | . | . | 100 | . | 100 | 100 | . | . | . | . | 100 | 100 | 100 | 100 | 100 |
| GCF_021441845.1.fasta | . | . | 100 | . | . | . | . | . | . | . | 100 | 100 | 100 | 100 | 100 |
| GCF_024495065.1.fasta | . | . | 100 | . | . | . | . | . | . | . | 100 | 100 | 100 | 100 | 100 |
| GCF_024495515.1.fasta | . | . | 100 | . | . | . | . | . | . | . | 100 | 100 | 100 | 100 | 100 |
| SAMEA113605448.fasta | . | . | 100 | . | 100 | 100 | . | . | . | . | 100 | 100 | 100 | 100 | 100 |
| SAMEA113605746.fasta | . | . | 100 | . | 100 | 100 | . | . | . | . | 100 | 100 | 100 | 100 | 100 |
| SAMEA2052930.fasta | . | . | 100 | . | 100 | 100 | . | . | . | . | 100 | 100 | 100 | 100 | 100 |
| SAMEA2633723.fasta | 100 | 100 | 100 | 100 | . | . | 100 | 100 | 100 | 100 | 100 | 100 | 100 | 100 | 100 |
| SAMEA3281566.fasta | . | . | 100 | . | . | . | . | . | . | . | 100 | 100 | 100 | 100 | 100 |
| SAMEA5758680.fasta | . | . | 100 | . | 100 | 100 | . | . | . | . | 100 | 100 | 100 | 100 | 100 |
| SAMEA6155812.fasta | . | . | 100 | . | 100 | 100 | . | . | . | . | 100 | 100 | 100 | 100 | 100 |
| SAMEA6155829.fasta | . | . | 100 | . | 100 | 100 | . | . | . | . | 100 | 100 | 100 | 100 | 100 |
| SAMEA6155886.fasta | . | . | 100 | . | 100 | 100 | . | . | . | . | 100 | 100 | 100 | 100 | 100 |
| SAMEA6156048.fasta | . | . | 100 | . | 100 | 100 | . | . | . | . | 100 | 100 | 100 | 100 | 100 |
| SAMEA6375606.fasta | . | . | 100 | . | . | . | . | . | . | . | 100 | 100 | 100 | 100 | 100 |
| SAMEA6635864.fasta | . | . | 100 | . | 100 | 100 | . | . | . | . | 100 | 100 | 100 | 100 | 100 |
| SAMEA6654214.fasta | . | . | 100 | . | 100 | 100 | . | . | . | . | 100 | 100 | 100 | 100 | 100 |
| SAMEA6654216.fasta | . | . | 100 | . | 100 | 100 | . | . | . | . | 100 | 100 | 100 | 100 | 100 |
| SAMEA6654217.fasta | . | . | 100 | . | 100 | 100 | . | . | . | . | 100 | 100 | 100 | 100 | 100 |
| SAMEA6654218.fasta | . | . | 100 | . | 100 | 100 | . | . | . | . | 100 | 100 | 100 | 100 | 100 |
| SAMEA7472332.fasta | . | . | 100 | . | . | . | . | . | . | . | 100 | 100 | 100 | 100 | 100 |
| SAMEA7472348.fasta | . | . | 100 | . | 100 | 100 | . | . | . | . | 100 | 100 | 100 | 100 | 100 |
| SAMN16197932.fasta | . | . | 100 | . | 100 | 100 | . | . | . | . | 100 | 100 | 100 | 100 | 100 |
| SAMN16197933.fasta | . | . | 100 | . | 100 | 100 | . | . | . | . | 100 | 100 | 100 | 100 | 100 |
| SAMN16197935.fasta | . | . | 100 | . | 100 | 100 | . | . | . | . | 100 | 100 | 100 | 100 | 100 |
| SAMN17981712.fasta | . | . | 100 | . | . | . | . | . | . | . | 100 | 100 | 100 | 100 | 100 |

|  | **66** | **67** | **68** | **69** | **70** | **71** | **72** | **73** | **74** | **75** | **76** | **77** | **78** | **79** | **80** |
| --- | --- | --- | --- | --- | --- | --- | --- | --- | --- | --- | --- | --- | --- | --- | --- |
| **#FILE** | **mrkF** | **mrkH** | **mrkI** | **mrkJ** | **ompA** | **phoP** | **rcsA** | **rcsB** | **rfbA** | **rfbB** | **rfbD** | **rfbK1** | **rmpA** | **rmpA2** | **rpoS** |
| A1.fasta | 100 | 100 | 100 | 100 | 100 | . | 100 | . | 100 | 100 | 100 | 100 | 100 | . | 99.8 |
| GCA_002186705.1.fasta | 100 | 100 | 100 | 100 | 100 | . | 100 | 100 | 100 | 100 | 100 | 100 | . | . | 99.8 |
| GCA_002186945.1.fasta | 100 | 100 | 100 | 100 | 100 | . | 100 | 100 | 100 | 100 | 100 | 100 | . | . | 99.8 |
| GCA_002187375.1.fasta | 100 | 100 | 100 | 100 | 100 | . | 100 | 100 | 100 | 100 | 100 | 100 | . | . | 99.8 |
| GCA_002187715.1.fasta | 100 | 100 | 100 | 100 | 100 | . | 100 | 100 | 100 | 100 | 100 | 100 | . | . | 99.8 |
| GCA_002188235.1.fasta | 100 | 100 | 100 | 100 | 100 | . | 100 | 100 | 100 | 100 | 100 | 100 | . | . | 99.8 |
| GCA_003195295.1.fasta | 100 | 100 | 100 | 100 | 100 | . | 100 | 100 | 100 | 100 | 100 | 100 | . | . | 99.8 |
| GCA_014788765.1.fasta | 100 | 100 | 100 | 100 | 100 | . | 100 | 100 | 100 | 100 | 100 | 100 | . | . | 99.8 |
| GCA_015720195.1.fasta | 100 | 100 | 100 | 100 | 100 | . | 100 | 100 | 100 | 100 | 100 | 100 | . | . | 99.8 |
| GCA_021920105.1.fasta | 100 | 100 | 100 | 100 | 100 | . | 100 | 100 | 100 | 100 | 100 | 100 | . | . | 99.8 |
| GCA_021920885.1.fasta | 100 | 100 | 100 | 100 | 100 | . | 100 | 100 | 100 | 100 | 100 | 100 | . | . | 99.8 |
| GCA_021920985.1.fasta | 100 | 100 | 100 | 100 | 100 | . | 100 | 100 | 100 | 100 | 100 | 100 | . | . | 99.8 |
| GCA_021925685.1.fasta | 100 | 100 | 100 | 100 | 100 | . | 100 | 100 | 100 | 100 | 100 | 100 | . | . | 99.8 |
| GCA_021926845.1.fasta | 100 | 100 | 100 | 100 | 100 | . | 100 | 100 | 100 | 100 | 100 | 100 | . | . | 99.8 |
| GCA_021928295.1.fasta | 100 | 100 | 100 | 100 | 100 | . | 100 | 100 | 100 | 100 | 100 | 100 | . | . | 99.8 |
| GCA_021928995.1.fasta | 100 | 100 | 100 | 100 | 100 | . | 100 | 100 | 100 | 100 | 100 | 100 | . | . | 99.8 |
| GCA_021929455.1.fasta | 100 | 100 | 100 | 100 | 100 | . | 100 | 100 | 100 | 100 | 100 | 100 | . | . | 99.8 |
| GCA_021933415.1.fasta | 100 | 100 | 100 | 100 | 100 | 99.26 | 100 | 100 | 100 | 100 | 100 | 100 | . | 99.37 | 99.8 |
| GCA_021956765.1.fasta | 100 | 100 | 100 | 100 | 100 | . | 100 | 100 | 100 | 100 | 100 | 100 | . | . | 99.8 |
| GCA_021957705.1.fasta | 100 | 100 | 100 | 100 | 100 | . | 100 | 100 | 100 | 100 | 100 | 100 | . | . | 99.8 |
| GCA_022048705.1.fasta | 100 | 100 | 100 | 100 | 100 | . | 100 | 100 | 100 | 100 | 100 | 100 | . | . | 99.8 |
| GCA_022061125.1.fasta | 100 | 100 | 100 | 100 | 100 | . | 100 | 100 | 100 | 100 | 100 | 100 | . | . | 99.8 |
| GCA_022084535.1.fasta | 100 | 100 | 100 | 100 | 100 | . | 100 | 100 | 100 | 100 | 100 | 100 | . | . | 99.8 |
| GCA_022176145.1.fasta | 100 | 100 | 100 | 100 | 100 | . | 100 | 100 | 100 | 100 | 100 | 100 | . | . | 99.8 |
| GCA_022176185.1.fasta | 100 | 100 | 100 | 100 | 100 | . | 100 | 100 | 100 | 100 | 100 | 100 | . | . | 99.8 |
| GCA_022176205.1.fasta | 100 | 100 | 100 | 100 | 100 | . | 100 | 100 | 100 | 100 | 100 | 100 | . | . | 99.8 |
| GCA_022176585.1.fasta | 100 | 100 | 100 | 100 | 100 | . | 100 | 100 | 100 | 100 | 100 | 100 | . | . | 99.8 |
| GCA_022176645.1.fasta | 100 | 100 | 100 | 100 | 100 | . | 100 | 100 | 100 | 100 | 100 | 100 | . | . | 99.8 |
| GCA_022233245.1.fasta | 100 | 100 | 100 | 100 | 100 | . | 100 | 100 | 100 | 100 | 100 | 100 | 94 | . | 99.8 |
| GCA_022233305.1.fasta | 100 | 100 | 100 | 100 | 100 | . | 100 | 100 | 100 | 100 | 100 | 100 | 100 | . | 99.8 |
| GCA_022233405.1.fasta | 100 | 100 | 100 | 100 | 100 | 99.26 | 100 | 100 | 100 | 100 | 100 | 100 | 96.68 | 99.84 | 99.8 |
| GCA_022250515.1.fasta | 100 | 100 | 100 | 100 | 100 | . | 100 | 100 | 100 | 100 | 100 | 100 | . | . | 99.8 |
| GCA_022270255.1.fasta | 100 | 100 | 100 | 100 | 100 | . | 100 | 100 | 100 | 100 | 100 | 100 | . | . | 99.8 |
| GCA_022270275.1.fasta | 100 | 100 | 100 | 100 | 100 | . | 100 | 100 | 100 | 100 | 100 | 100 | . | . | 99.8 |
| GCA_022270495.1.fasta | 100 | 100 | 100 | 100 | 100 | . | 100 | 100 | 100 | 100 | 100 | 100 | . | . | 99.8 |
| GCA_022270575.1.fasta | 100 | 100 | 100 | 100 | 100 | . | 100 | 100 | 100 | 100 | 100 | 100 | . | . | 99.8 |
| GCA_022270615.1.fasta | 100 | 100 | 100 | 100 | 100 | . | 100 | 100 | 100 | 100 | 100 | 100 | . | . | 99.8 |
| GCA_022270695.1.fasta | 100 | 100 | 100 | 100 | 100 | . | 100 | 100 | 100 | 100 | 100 | 100 | . | . | 99.8 |
| GCA_024392555.1.fasta | 100 | 100 | 100 | 82.98 | 100 | . | 100 | 100 | 100 | 100 | 100 | 100 | . | . | 99.8 |
| GCA_024474865.1.fasta | 100 | 100 | 100 | 100 | 100 | . | 100 | 100 | 100 | 100 | 100 | 100 | . | . | 99.8 |
| GCA_025101225.1.fasta | 100 | 100 | 100 | 100 | 100 | . | 100 | 100 | 100 | 100 | 100 | 100 | 100 | . | 99.8 |
| GCA_026361275.1.fasta | 100 | 100 | 100 | 100 | 100 | . | . | 100 | 100 | 100 | 100 | 100 | . | . | 99.8 |
| GCA_030786325.1.fasta | 100 | 100 | 100 | 100 | 100 | . | 100 | 100 | 100 | 100 | 100 | 100 | . | . | 99.8 |
| GCA_030820975.1.fasta | 100 | 100 | 100 | 100 | 100 | . | 100 | 100 | 100 | 100 | 100 | 100 | . | . | 99.8 |
| GCA_032044555.1.fasta | 100 | 100 | 100 | 100 | 100 | . | 100 | 100 | 82.29 | 100 | 100 | 100 | . | 96.09 | 99.8 |
| GCA_032046295.1.fasta | 100 | 100 | 100 | 100 | 100 | . | 100 | 100 | 100 | 100 | 100 | 99.93 | . | . | 99.8 |
| GCA_032062785.1.fasta | 100 | 100 | 100 | 100 | 100 | . | 100 | 100 | 100 | 100 | 100 | 100 | . | . | 99.8 |
| GCA_032066125.1.fasta | 100 | 100 | 100 | 100 | 100 | . | 100 | 100 | 100 | 100 | 100 | 100 | . | . | 99.8 |
| GCA_032066145.1.fasta | 100 | 100 | 100 | 100 | 100 | . | 100 | 100 | 100 | 100 | 100 | 100 | . | . | 99.8 |
| GCA_032070585.1.fasta | 100 | 100 | 100 | 100 | 100 | . | 100 | 100 | 80.47 | 100 | 100 | 100 | . | . | 99.8 |
| GCA_032070965.1.fasta | 100 | 100 | 100 | 100 | 100 | . | 100 | 100 | 81.51 | 100 | 100 | 100 | . | . | 99.8 |
| GCA_032072835.1.fasta | 100 | 100 | 100 | 100 | 100 | . | 100 | 100 | 100 | 100 | 100 | 100 | . | . | 99.8 |
| GCA_032077145.1.fasta | 100 | 100 | 100 | 100 | 100 | . | 100 | 100 | 100 | 100 | 100 | 100 | . | . | 99.8 |
| GCA_032128025.1.fasta | 100 | 100 | 100 | 100 | 100 | 99.26 | 100 | 100 | 100 | 100 | 100 | 100 | 100 | 99.37 | 99.8 |
| GCA_032129715.1.fasta | 100 | 100 | 100 | 100 | 100 | . | 100 | 100 | 95.7 | 100 | 100 | 100 | . | . | 99.8 |
| GCA_032132495.1.fasta | 100 | 100 | 100 | 100 | 100 | . | 100 | 100 | 100 | 100 | 100 | 100 | . | . | 99.8 |
| GCA_032132835.1.fasta | 100 | 99.86 | 100 | 100 | 100 | . | 100 | 100 | 100 | 100 | 100 | 100 | . | . | 99.8 |
| GCA_032134135.1.fasta | 100 | 100 | 100 | 100 | 100 | . | 100 | 100 | 100 | 100 | 100 | 100 | . | . | 99.8 |
| GCA_032134975.1.fasta | 100 | 100 | 100 | 100 | 100 | . | 100 | 100 | 100 | 100 | 100 | 100 | . | . | 99.8 |
| GCA_032137635.1.fasta | 100 | 100 | 100 | 100 | 100 | . | 100 | 100 | 100 | 100 | 100 | 100 | . | . | 99.8 |
| GCA_032153315.1.fasta | 100 | 100 | 100 | 100 | 100 | . | 100 | 100 | 100 | 100 | 100 | 100 | . | . | 99.8 |
| GCA_032155885.1.fasta | 100 | 100 | 100 | 100 | 100 | . | 100 | 100 | 100 | 100 | 100 | 100 | . | . | 99.8 |
| GCA_032411785.1.fasta | 100 | 100 | 100 | 100 | 100 | . | 100 | 100 | 100 | 100 | 100 | 100 | . | . | 99.8 |
| GCA_033106885.1.fasta | 100 | 100 | 100 | 100 | 100 | 99.26 | 100 | 100 | 100 | 100 | 100 | 100 | . | . | 99.8 |
| GCA_033107445.1.fasta | 100 | 100 | 100 | 100 | 100 | 99.26 | 100 | 100 | 100 | 100 | 100 | 100 | . | . | 99.8 |
| GCA_033108425.1.fasta | 100 | 100 | 100 | 100 | 100 | . | 100 | 100 | 100 | 100 | 100 | 100 | 100 | . | 99.8 |
| GCA_033122545.1.fasta | 100 | 100 | 100 | 100 | 100 | . | 100 | 100 | 100 | 100 | 100 | 100 | . | . | 99.8 |
| GCA_900181095.1.fasta | 100 | 100 | 100 | 100 | 100 | . | 100 | 100 | 100 | 100 | 100 | 100 | . | . | 99.8 |
| GCA_900502575.1.fasta | 100 | 100 | 100 | 100 | 100 | . | 100 | 100 | 100 | 100 | 100 | 100 | . | . | 99.8 |
| GCA_900503265.1.fasta | 100 | 100 | 100 | 100 | 100 | . | 100 | 100 | 100 | 100 | 100 | 100 | . | . | 99.8 |
| GCA_900504655.1.fasta | 100 | 100 | 100 | 100 | 100 | . | 100 | 100 | 100 | 100 | 100 | 100 | . | . | 99.8 |
| GCA_900504955.1.fasta | 100 | 100 | 100 | 100 | 100 | . | 100 | 100 | 100 | 100 | 100 | 100 | . | . | 99.8 |
| GCA_900506745.1.fasta | 100 | 100 | 100 | 100 | 100 | . | 100 | 100 | 100 | 100 | 100 | 100 | . | . | 99.8 |
| GCA_900512545.1.fasta | 100 | 100 | 100 | 100 | 100 | . | 100 | 100 | 100 | 100 | 100 | 100 | . | . | 99.8 |
| GCF_021441845.1.fasta | 100 | 100 | 100 | 100 | 100 | . | 100 | 100 | 100 | 100 | 100 | 100 | . | . | 99.8 |
| GCF_024495065.1.fasta | 100 | 100 | 100 | 100 | 100 | . | 100 | 100 | 92.84 | 100 | 100 | 100 | . | . | 99.8 |
| GCF_024495515..fasta | 100 | 100 | 100 | 100 | 100 | . | 100 | 100 | 100 | 100 | 100 | 100 | . | . | 99.8 |
| SAMEA113605448.fasta | 100 | 100 | 100 | 100 | 100 | . | 100 | 100 | 87.24 | 100 | 100 | 100 | . | . | 99.8 |
| SAMEA113605746.fasta | 100 | 100 | 100 | 100 | 100 | . | 100 | 100 | 100 | 100 | . | 100 | . | . | 99.8 |
| SAMEA2052930.fasta | 100 | 100 | 100 | 100 | 100 | . | 100 | 100 | 100 | 100 | 100 | 100 | . | . | 99.8 |
| SAMEA2633723.fasta | 100 | 100 | 100 | 100 | 100 | 99.26 | 100 | 100 | 100 | 100 | 100 | 100 | 100 | 99.84 | 99.8 |
| SAMEA3281566.fasta | 100 | 100 | 100 | 100 | 100 | . | 100 | 100 | 100 | 100 | 100 | 100 | . | . | 99.8 |
| SAMEA5758680.fasta | 100 | 100 | 100 | 100 | 100 | . | 100 | 100 | 100 | 100 | 100 | 100 | . | . | 99.8 |
| SAMEA6155812.fasta | 100 | 100 | 100 | 100 | 100 | . | 100 | 100 | 100 | 100 | 100 | 100 | . | . | 99.8 |
| SAMEA6155829.fasta | 100 | 100 | 100 | 100 | 100 | . | 100 | 100 | 100 | 100 | 100 | 100 | . | . | 99.8 |
| SAMEA6155886.fasta | 100 | 100 | 100 | 100 | 100 | . | 100 | 100 | 100 | 100 | 100 | 100 | . | . | 99.8 |
| SAMEA6156048.fasta | 100 | 100 | 100 | 100 | 100 | . | 100 | 100 | 100 | 100 | 100 | 100 | . | . | 99.8 |
| SAMEA6375606.fasta | 100 | 100 | 100 | 100 | 100 | . | 100 | 100 | 100 | 100 | 100 | 100 | . | . | 99.8 |
| SAMEA6635864.fasta | 100 | 100 | 100 | 100 | 100 | . | 100 | 100 | 100 | 100 | 100 | 100 | . | . | 99.8 |
| SAMEA6654214.fasta | 100 | 100 | 100 | 100 | 100 | . | 100 | 100 | 100 | 100 | 100 | 100 | . | . | 99.7 |
| SAMEA6654216.fasta | 100 | 100 | 100 | 100 | 100 | . | 100 | 100 | 100 | 100 | 100 | 100 | . | . | 99.8 |
| SAMEA6654217.fasta | 100 | 100 | 100 | 100 | 100 | . | 100 | 100 | 100 | 100 | 100 | 100 | . | . | 99.8 |
| SAMEA6654218.fasta | 100 | 100 | 100 | 100 | 100 | . | 100 | 100 | 100 | 100 | 100 | 100 | . | . | 99.8 |
| SAMEA7472332.fasta | 100 | 100 | 100 | 100 | 100 | . | 100 | 100 | 100 | 100 | 100 | 100 | . | . | 99.8 |
| SAMEA7472348.fasta | 100 | 100 | 100 | 100 | 100 | . | . | 100 | 100 | 100 | 100 | 100 | . | . | 99.8 |
| SAMN16197932.fasta | 100 | 100 | 100 | 100 | 100 | . | 100 | 100 | 100 | 100 | 100 | 100 | . | . | 99.8 |
| SAMN16197933.fasta | 100 | 100 | 100 | 100 | 100 | . | 100 | 100 | 100 | 100 | 100 | 100 | . | . | 99.8 |
| SAMN16197935.fasta | 100 | 100 | 100 | 100 | 100 | . | 100 | 100 | 100 | 100 | 100 | 100 | . | . | 99.8 |
| SAMN17981712.fasta | 100 | 100 | 100 | 100 | 100 | . | 100 | 100 | 100 | 100 | 100 | 100 | . | . | 99.8 |

|  | **81** | **82** | **83** | **84** | **85** | **86** | **87** | **88** | **89** | **90** |
| --- | --- | --- | --- | --- | --- | --- | --- | --- | --- | --- |
| **#FILE** | **sciN/tssJ** | **tssF** | **tssG** | **ugd** | **vasE/tssK** | **vipA/tssB** | **vipB/tssC** | **yagV/ecpE** | **yagW/ecpD** | **yagX/ecpC** |
| A1.fasta | 100 | 100 | 100 | 100 | 100 | 100 | 100 | 100 | 100 | 99.96 |
| GCA_002186705.1.fasta | 100 | 100 | 100 | 100 | 100 | 100 | 100 | 100 | 100 | 99.96 |
| GCA_002186945.1.fasta | 100 | 100 | 100 | 100 | 100 | 100 | 100 | 100 | 100 | 99.96 |
| GCA_002187375.1.fasta | 100 | . | 100 | 100 | 100 | 100 | 100 | 100 | 100 | 99.96 |
| GCA_002187715.1.fasta | 100 | 100 | 100 | 100 | 100 | 100 | 100 | 100 | 100 | 99.96 |
| GCA_002188235.1.fasta | 100 | 100 | 100 | 100 | 100 | 100 | 100 | 100 | 100 | 99.96 |
| GCA_003195295.1.fasta | 100 | 100 | 100 | 100 | 100 | 100 | 100 | 100 | 84.98 | 99.96 |
| GCA_014788765.1.fasta | 100 | 100 | 100 | 100 | 100 | 100 | 100 | 100 | 100 | 99.96 |
| GCA_015720195.1.fasta | 100 | 100 | 100 | 100 | 100 | 100 | 100 | 100 | 100 | 99.96 |
| GCA_021920105.1.fasta | 100 | 100 | 100 | 100 | 100 | 100 | 100 | 100 | 100 | 99.96 |
| GCA_021920885.1.fasta | 100 | 100 | 100 | 100 | 100 | 100 | 100 | 100 | 100 | 99.96 |
| GCA_021920985.1.fasta | 100 | 100 | 100 | 100 | 100 | 100 | 100 | 100 | 100 | 99.96 |
| GCA_021925685.1.fasta | 100 | 100 | 100 | 100 | 100 | 100 | 100 | 100 | 100 | 99.96 |
| GCA_021926845.1.fasta | 100 | 100 | 100 | 100 | 100 | 100 | 100 | 100 | 100 | 99.96 |
| GCA_021928295.1.fasta | 100 | 100 | 100 | 100 | 100 | 100 | 100 | 100 | 100 | 99.96 |
| GCA_021928995.1.fasta | 100 | 100 | 100 | 100 | 100 | 100 | 100 | 100 | 100 | 99.96 |
| GCA_021929455.1.fasta | 100 | 100 | 100 | 100 | 100 | 100 | 100 | 100 | 100 | 99.96 |
| GCA_021933415.1.fasta | 100 | 100 | 100 | 100 | 100 | 100 | 100 | 100 | 100 | 99.96 |
| GCA_021956765.1.fasta | 100 | 100 | 100 | 100 | 100 | 100 | 100 | 100 | 100 | 99.96 |
| GCA_021957705.1.fasta | 100 | 100 | 100 | 100 | 100 | 100 | 100 | 100 | 100 | 99.96 |
| GCA_022048705.1.fasta | 100 | 100 | 100 | 100 | 100 | 100 | 100 | 100 | 100 | 99.96 |
| GCA_022061125.1.fasta | 100 | 100 | 100 | 100 | 100 | 100 | 100 | 100 | 100 | 99.96 |
| GCA_022084535.1.fasta | 100 | 100 | 100 | 100 | 100 | 100 | 100 | 100 | 100 | 99.96 |
| GCA_022176145.1.fasta | 100 | 100 | 100 | 100 | 100 | 100 | 100 | 100 | 100 | 99.96 |
| GCA_022176185.1.fasta | 100 | 100 | 100 | 100 | 100 | 100 | 100 | 100 | 100 | 99.96 |
| GCA_022176205.1.fasta | 100 | 100 | 100 | 100 | 100 | 100 | 100 | 100 | 100 | 99.96 |
| GCA_022176585.1.fasta | 100 | 100 | 100 | 100 | 100 | 100 | 100 | 100 | 100 | 99.96 |
| GCA_022176645.1.fasta | 100 | 100 | 100 | 100 | 100 | 100 | 100 | 100 | 100 | 99.96 |
| GCA_022233245.1.fasta | 100 | 100 | 100 | 100 | 100 | 100 | 100 | 100 | 100 | 99.96 |
| GCA_022233305.1.fasta | 100 | 100 | 100 | 100 | 100 | 100 | 100 | 100 | 100 | 99.96 |
| GCA_022233405.1.fasta | 100 | 99.94 | 100 | 100 | 100 | 100 | 99.61 | 100 | 100 | 99.96 |
| GCA_022250515.1.fasta | 100 | 100 | 100 | 100 | 100 | 100 | 100 | 100 | 100 | 99.96 |
| GCA_022270255.1.fasta | 100 | 100 | 100 | 100 | 100 | 100 | 100 | 100 | 100 | 99.96 |
| GCA_022270275.1.fasta | 100 | 100 | 100 | 100 | 100 | 100 | 100 | 100 | 100 | 99.96 |
| GCA_022270495.1.fasta | 100 | 100 | 100 | 100 | 100 | 100 | 100 | 100 | 100 | 99.96 |
| GCA_022270575.1.fasta | 100 | 100 | 100 | 100 | 100 | 100 | 100 | 100 | 100 | 99.96 |
| GCA_022270615.1.fasta | 100 | 100 | 100 | 100 | 100 | 100 | 100 | 100 | 100 | 99.96 |
| GCA_022270695.1.fasta | 100 | 100 | 100 | 100 | 100 | 100 | 100 | 100 | 100 | 99.96 |
| GCA_024392555.1.fasta | 100 | 100 | 100 | 100 | 100 | 100 | 100 | 100 | 100 | 99.96 |
| GCA_024474865.1.fasta | 100 | 100 | 100 | 100 | 100 | 100 | 100 | 100 | 100 | 99.96 |
| GCA_025101225.1.fasta | 100 | 100 | 100 | 100 | 100 | 100 | 100 | 100 | 100 | 99.96 |
| GCA_026361275.1.fasta | 100 | 100 | 100 | 100 | 100 | 100 | 100 | 100 | 100 | 99.96 |
| GCA_030786325.1.fasta | 100 | 100 | 100 | 100 | 100 | 100 | 100 | 100 | 100 | 99.96 |
| GCA_030820975.1.fasta | 100 | 100 | 100 | 100 | 100 | 100 | 100 | 100 | 100 | 99.96 |
| GCA_032044555.1.fasta | 100 | 100 | 100 | 100 | 100 | 100 | 100 | 100 | 100 | 99.96 |
| GCA_032046295.1.fasta | 100 | 100 | 100 | 100 | 100 | 100 | 100 | 100 | 100 | 99.96 |
| GCA_032062785.1.fasta | 100 | 100 | 100 | 100 | 100 | 100 | 100 | 100 | 100 | 99.96 |
| GCA_032066125.1.fasta | 100 | 100 | 100 | 100 | 100 | 100 | 100 | 100 | 100 | 99.96 |
| GCA_032066145.1.fasta | 100 | 100 | 100 | 100 | 100 | 100 | 100 | 100 | 100 | 99.96 |
| GCA_032070585.1.fasta | 100 | 100 | 100 | 100 | 100 | 100 | 100 | 100 | 100 | 99.96 |
| GCA_032070965.1.fasta | 100 | 100 | 100 | 100 | 100 | 100 | 100 | 100 | 100 | 99.96 |
| GCA_032072835.1.fasta | 100 | 100 | 100 | 100 | 100 | 100 | 100 | 100 | 100 | 99.96 |
| GCA_032077145.1.fasta | 100 | 100 | 100 | 100 | 100 | 100 | 100 | 100 | 100 | 99.96 |
| GCA_032128025.1.fasta | 100 | 100 | 100 | 100 | 100 | 100 | 100 | 100 | 100 | 99.96 |
| GCA_032129715.1.fasta | 100 | 100 | 100 | 100 | 100 | 100 | 100 | 100 | 100 | 99.96 |
| GCA_032132495.1.fasta | 100 | 100 | 100 | 100 | 100 | 100 | 100 | 100 | 100 | 99.96 |
| GCA_032132835.1.fasta | 100 | 100 | 100 | 100 | 100 | 100 | 100 | 100 | 100 | 99.96 |
| GCA_032134135.1.fasta | 100 | 100 | 100 | 100 | 100 | 100 | 100 | 100 | 100 | 99.96 |
| GCA_032134975.1.fasta | 100 | 100 | 100 | 100 | 100 | 100 | 100 | 100 | 100 | 99.96 |
| GCA_032137635.1.fasta | 100 | 100 | 100 | 100 | 100 | 100 | 100 | 100 | 100 | 99.96 |
| GCA_032153315.1.fasta | 100 | 100 | 100 | 100 | 100 | 100 | 100 | 100 | 100 | 99.96 |
| GCA_032155885.1.fasta | 100 | 100 | 100 | 100 | 100 | 100 | 100 | 100 | 100 | 99.96 |
| GCA_032411785.1.fasta | 100 | 100 | 100 | 100 | 100 | 100 | 100 | 100 | 100 | 99.96 |
| GCA_033106885.1.fasta | 100 | 99.94 | 100 | 100 | 100 | 100 | 100 | 100 | 100 | 99.96 |
| GCA_033107445.1.fasta | 100 | 99.94 | 100 | 100 | 100 | 100 | 99.61 | 100 | 100 | 99.96 |
| GCA_033108425.1.fasta | 100 | 100 | 100 | 100 | 100 | 100 | 100 | 100 | 100 | . |
| GCA_033122545.1.fasta | 100 | 100 | 100 | 100 | 100 | 100 | 100 | 100 | 100 | 99.96 |
| GCA_900181095.1.fasta | 100 | 100 | 100 | 100 | 100 | 100 | 100 | 100 | 100 | 99.96 |
| GCA_900502575.1.fasta | 100 | 100 | 100 | 100 | 100 | 100 | 100 | 100 | 100 | 99.96 |
| GCA_900503265.1.fasta | 100 | 100 | 100 | 100 | 100 | 100 | 100 | 100 | 100 | 99.96 |
| GCA_900504655.1.fasta | 100 | 100 | 100 | 100 | 100 | 100 | 100 | 100 | 100 | 99.96 |
| GCA_900504955.1.fasta | 100 | 100 | 100 | 100 | 100 | 100 | 100 | 100 | 100 | 99.96 |
| GCA_900506745.1.fasta | 100 | 100 | 100 | 100 | 100 | 100 | 100 | 100 | 100 | 99.96 |
| GCA_900512545.1.fasta | 100 | 100 | 100 | 100 | 100 | 100 | 100 | 100 | 100 | 99.96 |
| GCF_021441845.1.fasta | 100 | 100 | 100 | 100 | 100 | 100 | 100 | 100 | 100 | 99.96 |
| GCF_024495065.1.fasta | 100 | 100 | 100 | 100 | 100 | 100 | 100 | 100 | 100 | 99.96 |
| GCF_024495515.1.fasta | 100 | 100 | 100 | 100 | 100 | 100 | 100 | 100 | 100 | 99.96 |
| SAMEA113605448.fasta | 100 | 100 | 100 | 100 | 100 | 100 | 100 | 100 | 100 | 99.96 |
| SAMEA113605746.fasta | 100 | 86.78 | 100 | 100 | 100 | 100 | 100 | 100 | 100 | 99.96 |
| SAMEA2052930.fasta | 100 | 100 | 100 | 100 | 100 | 100 | 100 | 100 | 100 | 99.96 |
| SAMEA2633723.fasta | 100 | 99.94 | 100 | 100 | 100 | 100 | 100 | 100 | 100 | 99.96 |
| SAMEA3281566.fasta | 100 | 100 | 100 | 100 | 100 | 100 | 100 | 100 | 100 | 99.96 |
| SAMEA5758680.fasta | 100 | 100 | 100 | 100 | 100 | 100 | 100 | 100 | 100 | 99.96 |
| SAMEA6155812.fasta | 100 | 100 | 100 | 100 | 100 | 100 | 100 | 100 | 100 | 99.96 |
| SAMEA6155829.fasta | 100 | 100 | 100 | 100 | 100 | 100 | 100 | 100 | 100 | 99.96 |
| SAMEA6155886.fasta | 100 | 100 | 100 | 100 | 100 | 100 | 100 | 100 | 100 | 99.96 |
| SAMEA6156048.fasta | 100 | 100 | 100 | 100 | 100 | 100 | 100 | 100 | 100 | 99.96 |
| SAMEA6375606.fasta | 100 | 100 | 100 | 100 | 100 | 100 | 100 | 100 | 100 | 99.96 |
| SAMEA6635864.fasta | 100 | 100 | 100 | 100 | 100 | 100 | 100 | 100 | 100 | 99.96 |
| SAMEA6654214.fasta | 100 | 100 | 100 | 100 | 100 | 100 | 100 | 100 | 100 | 99.96 |
| SAMEA6654216.fasta | 100 | 100 | 100 | 100 | 100 | 100 | 100 | 100 | 100 | 99.96 |
| SAMEA6654217.fasta | 100 | 100 | 100 | 100 | 100 | 100 | 100 | 100 | 100 | 99.96 |
| SAMEA6654218.fasta | 100 | 100 | 100 | 100 | 100 | 100 | 100 | 100 | 100 | 99.96 |
| SAMEA7472332.fasta | 100 | 100 | 100 | 100 | 100 | 100 | 100 | 100 | 100 | 99.96 |
| SAMEA7472348.fasta | 100 | 100 | 100 | 100 | 100 | 100 | 100 | 100 | 100 | 99.96 |
| SAMN16197932.fasta | 100 | 100 | 100 | 100 | 100 | 100 | 100 | 100 | 100 | 99.96 |
| SAMN16197933.fasta | 100 | 100 | 100 | 100 | 100 | 100 | 100 | 100 | 100 | 99.96 |
| SAMN16197935.fasta | 100 | 100 | 100 | 100 | 100 | 100 | 100 | 100 | 100 | 99.96 |
| SAMN17981712.fasta | 100 | 100 | 100 | 100 | 100 | 100 | 100 | 100 | 100 | 99.96 |

|  | **91** | **92** | **93** | **94** | **95** | **96** | **97** | **98** | **99** | **100** | **101** |
| --- | --- | --- | --- | --- | --- | --- | --- | --- | --- | --- | --- |
| **#FILE** | **yagY/ecpB** | **yagZ/ecpA** | **ybtA** | **ybtE** | **ybtP** | **ybtQ** | **ybtS** | **ybtT** | **ybtU** | **ybtX** | **ykgK/ecpR** |
| A1.fasta | 100 | 99.32 | 100 | 100 | 100 | 100 | 100 | 100 | 100 | 100 | 100 |
| GCA_002186705.1.fasta | 100 | 99.32 | . | . | . | . | . | . | . | . | 100 |
| GCA_002186945.1.fasta | 100 | 99.32 | . | . | . | . | . | . | . | . | 100 |
| GCA_002187375.1.fasta | 100 | 99.32 | . | . | . | . | . | . | . | . | 100 |
| GCA_002187715.1.fasta | 100 | 99.32 | 100 | 100 | 100 | 100 | 100 | 100 | 100 | 100 | 100 |
| GCA_002188235.1.fasta | 100 | 99.32 | 100 | 100 | 100 | 100 | 100 | 100 | 100 | 100 | 100 |
| GCA_003195295.1.fasta | 100 | 99.32 | 100 | 100 | 100 | 100 | 100 | 100 | 100 | 100 | 100 |
| GCA_014788765.1.fasta | 100 | 99.32 | 100 | 100 | 100 | 100 | 100 | 100 | 100 | 100 | 100 |
| GCA_015720195.1.fasta | 100 | 99.32 | 100 | 100 | 100 | 100 | 100 | 100 | 100 | 100 | 100 |
| GCA_021920105.1.fasta | 100 | 99.32 | 100 | 100 | 100 | 100 | 100 | 100 | 100 | 100 | 100 |
| GCA_021920885.1.fasta | 100 | 99.32 | 100 | 100 | 100 | 100 | 100 | 100 | 100 | 100 | 100 |
| GCA_021920985.1.fasta | 100 | 99.32 | 100 | 100 | 100 | 100 | 100 | 100 | 100 | 100 | 100 |
| GCA_021925685.1.fasta | 100 | 99.32 | 100 | 100 | 100 | 100 | 100 | 100 | 100 | 100 | 100 |
| GCA_021926845.1.fasta | 100 | 99.32 | 100 | 100 | 100 | 100 | 100 | 100 | 100 | 100 | 100 |
| GCA_021928295.1.fasta | 100 | 99.32 | 100 | 100 | 100 | 100 | 100 | 100 | 100 | 100 | 100 |
| GCA_021928995.1.fasta | 100 | 99.32 | 100 | 100 | 100 | 100 | 100 | 100 | 100 | 100 | 100 |
| GCA_021929455.1.fasta | 100 | 99.32 | 100 | 100 | 99.94 | 100 | 100 | 100 | 100 | 100 | 100 |
| GCA_021933415.1.fasta | 100 | 99.32 | . | . | . | . | . | . | . | . | 100 |
| GCA_021956765.1.fasta | 100 | 99.32 | . | . | . | . | . | . | . | . | 100 |
| GCA_021957705.1.fasta | 100 | 99.32 | 100 | 100 | 100 | 100 | 100 | 100 | 100 | 100 | 100 |
| GCA_022048705.1.fasta | 100 | 99.32 | . | . | . | . | . | . | . | . | 100 |
| GCA_022061125.1.fasta | 100 | 99.32 | 100 | 100 | 100 | 100 | 100 | 100 | 100 | 100 | 100 |
| GCA_022084535.1.fasta | 100 | 99.32 | 100 | 100 | 100 | 100 | 100 | 100 | 100 | 100 | 100 |
| GCA_022176145.1.fasta | 100 | 99.32 | 100 | 100 | 100 | 100 | 100 | 100 | 100 | 100 | 100 |
| GCA_022176185.1.fasta | 100 | 99.32 | 100 | 100 | 100 | 100 | 100 | 100 | 100 | 100 | 100 |
| GCA_022176205.1.fasta | 100 | 99.32 | 100 | 100 | 100 | 100 | 100 | 100 | 100 | 100 | 100 |
| GCA_022176585.1.fasta | 100 | 99.32 | 100 | 100 | 100 | 100 | 100 | 100 | 100 | 100 | 100 |
| GCA_022176645.1.fasta | 100 | 99.32 | 100 | 100 | 100 | 100 | 100 | 100 | 100 | 100 | 100 |
| GCA_022233245.1.fasta | 100 | 99.32 | 100 | 100 | 100 | 100 | 100 | 100 | 100 | 100 | 100 |
| GCA_022233305.1.fasta | 100 | 99.32 | 100 | 100 | 100 | 100 | 100 | 100 | 100 | 100 | 100 |
| GCA_022233405.1.fasta | 100 | 99.32 | . | . | . | . | . | . | . | . | 100 |
| GCA_022250515.1.fasta | 100 | 99.32 | . | . | . | . | . | . | . | . | 100 |
| GCA_022270255.1.fasta | 100 | 99.32 | 100 | 100 | 100 | 100 | 100 | 100 | 100 | 100 | 100 |
| GCA_022270275.1.fasta | 100 | 99.32 | 100 | 100 | 100 | 100 | 100 | 100 | 100 | 100 | 100 |
| GCA_022270495.1.fasta | 100 | 99.32 | 100 | 100 | 100 | 100 | 100 | 100 | 100 | 100 | 100 |
| GCA_022270575.1.fasta | 100 | 99.32 | 100 | 100 | 100 | 100 | 100 | 100 | 100 | 100 | 100 |
| GCA_022270615.1.fasta | 100 | 99.32 | 100 | 100 | 100 | 100 | 100 | 100 | 100 | 100 | 100 |
| GCA_022270695.1.fasta | 100 | 99.32 | 100 | 100 | 100 | 100 | 100 | 100 | 100 | 100 | 100 |
| GCA_024392555.1.fasta | 100 | 99.32 | 100 | 100 | 100 | 100 | 100 | 100 | 100 | 100 | 100 |
| GCA_024474865.1.fasta | 100 | 99.32 | . | . | . | . | . | . | . | . | 100 |
| GCA_025101225.1.fasta | 100 | 99.32 | 100 | 100 | 100 | 100 | 100 | 100 | 100 | 100 | 100 |
| GCA_026361275.1.fasta | 100 | 99.32 | 100 | 100 | 100 | 100 | 100 | 100 | 100 | 100 | 100 |
| GCA_030786325.1.fasta | 100 | 99.32 | 100 | 100 | 100 | 100 | 100 | 100 | 100 | 100 | 100 |
| GCA_030820975.1.fasta | 100 | 99.32 | 100 | 100 | 100 | 100 | 100 | 100 | 100 | 100 | 100 |
| GCA_032044555.1.fasta | 100 | 99.32 | 100 | 99.94 | 100 | 100 | 100 | 100 | 100 | 100 | 100 |
| GCA_032046295.1.fasta | 100 | 99.32 | 100 | 100 | 100 | 100 | 100 | 100 | 100 | 100 | 100 |
| GCA_032062785.1.fasta | 100 | 99.32 | 100 | 100 | 100 | 100 | 100 | 100 | 100 | 100 | 100 |
| GCA_032066125.1.fasta | 100 | 99.32 | 100 | 100 | 100 | 100 | 100 | 100 | 100 | 100 | 100 |
| GCA_032066145.1.fasta | 100 | 99.32 | 100 | 100 | 100 | 100 | 100 | 100 | 100 | 100 | 100 |
| GCA_032070585.1.fasta | 100 | 99.32 | 100 | 100 | 100 | 100 | 100 | 100 | 100 | 100 | 100 |
| GCA_032070965.1.fasta | 100 | 99.32 | 100 | 100 | 100 | 100 | 100 | 100 | 100 | 100 | 100 |
| GCA_032072835.1.fasta | 100 | 99.32 | 100 | 100 | 100 | 100 | 100 | 100 | 100 | 100 | 100 |
| GCA_032077145.1.fasta | 100 | 99.32 | 100 | 100 | 100 | 100 | 100 | 100 | 100 | 100 | 100 |
| GCA_032128025.1.fasta | 100 | 99.32 | . | . | . | . | . | . | . | . | 100 |
| GCA_032129715.1.fasta | 100 | 99.32 | 100 | 100 | 100 | 100 | 100 | 100 | 100 | 100 | 100 |
| GCA_032132495.1.fasta | 100 | 99.32 | 100 | 100 | 100 | 100 | 100 | 100 | 100 | 100 | 100 |
| GCA_032132835.1.fasta | 100 | 99.32 | 100 | 100 | 100 | 100 | 100 | 100 | 100 | 100 | 100 |
| GCA_032134135.1.fasta | 100 | 99.32 | 100 | 100 | 100 | 100 | 100 | 100 | 100 | 100 | 100 |
| GCA_032134975.1.fasta | 100 | 99.32 | 100 | 100 | 100 | 100 | 100 | 100 | 100 | 100 | 100 |
| GCA_032137635.1.fasta | 100 | 99.32 | 100 | 100 | 100 | 100 | 100 | 100 | 100 | 100 | 100 |
| GCA_032153315.1.fasta | 100 | 99.32 | 100 | 100 | 100 | 100 | 100 | 100 | 100 | 100 | 100 |
| GCA_032155885.1.fasta | 100 | 99.32 | 100 | 100 | 100 | 100 | 100 | 100 | 100 | 100 | 100 |
| GCA_032411785.1.fasta | 100 | 99.32 | 100 | 100 | 100 | 100 | 100 | 100 | 100 | 100 | 100 |
| GCA_033106885.1.fasta | 100 | 99.32 | . | . | . | . | . | . | . | . | 100 |
| GCA_033107445.1.fasta | 100 | 99.32 | . | . | . | . | . | . | . | . | 100 |
| GCA_033108425.1.fasta | 100 | 99.32 | 100 | 100 | 100 | 100 | 100 | 100 | 100 | 100 | 100 |
| GCA_033122545.1.fasta | 100 | 99.32 | 100 | 100 | 100 | 100 | 100 | 100 | 100 | 100 | 100 |
| GCA_900181095.1.fasta | 100 | 99.32 | . | . | . | . | . | . | . | . | 100 |
| GCA_900502575.1.fasta | 100 | 99.32 | 100 | 100 | 100 | 100 | 100 | 100 | 100 | 100 | 100 |
| GCA_900503265.1.fasta | 100 | 99.32 | . | . | . | . | . | . | . | . | 100 |
| GCA_900504655.1.fasta | 100 | 99.32 | . | . | . | . | . | . | . | . | 100 |
| GCA_900504955.1.fasta | 100 | 99.32 | 100 | 100 | 100 | 100 | 100 | 100 | 100 | 100 | 100 |
| GCA_900506745.1.fasta | 100 | 99.32 | 100 | 100 | 100 | 100 | 100 | 100 | 100 | 100 | 100 |
| GCA_900512545.1.fasta | 100 | 99.32 | 100 | 100 | 100 | 100 | 100 | 100 | 100 | 100 | 100 |
| GCF_021441845.1.fasta | 100 | 99.32 | . | . | . | . | . | . | . | . | 100 |
| GCF_024495065.1.fasta | 100 | 99.32 | . | . | . | . | . | . | . | . | 100 |
| GCF_024495515.1.fasta | 100 | 99.32 | . | . | . | . | . | . | . | . | 100 |
| SAMEA113605448.fasta | 100 | 99.32 | 100 | 100 | 100 | 100 | 100 | 100 | 100 | 100 | 100 |
| SAMEA113605746.fasta | 100 | 99.32 | 100 | 100 | 100 | 100 | 100 | 100 | 100 | 100 | 100 |
| SAMEA2052930.fasta | 100 | 99.32 | 100 | 100 | 100 | 100 | 100 | 100 | 100 | 100 | 100 |
| SAMEA2633723.fasta | 100 | 99.32 | . | . | . | . | . | . | . | . | 100 |
| SAMEA3281566.fasta | 100 | 99.32 | . | . | . | . | . | . | . | . | 100 |
| SAMEA5758680.fasta | 100 | 99.32 | 100 | 100 | 100 | 100 | 100 | 100 | 100 | 100 | 100 |
| SAMEA6155812.fasta | 100 | 99.32 | 100 | 100 | 100 | 100 | 100 | 100 | 100 | 100 | 100 |
| SAMEA6155829.fasta | 100 | 99.32 | 100 | 100 | 100 | 100 | 100 | 100 | 100 | 100 | 100 |
| SAMEA6155886.fasta | 100 | 99.32 | 100 | 100 | 100 | 100 | 100 | 100 | 100 | 100 | 100 |
| SAMEA6156048.fasta | 100 | 99.32 | 100 | 100 | 100 | 100 | 100 | 100 | 100 | 100 | 100 |
| SAMEA6375606.fasta | 100 | 99.32 | . | . | . | . | . | . | . | . | 100 |
| SAMEA6635864.fasta | 100 | 99.32 | 100 | 100 | 100 | 100 | 100 | 100 | 100 | 100 | 100 |
| SAMEA6654214.fasta | 100 | 99.32 | 100 | 100 | 100 | 100 | 100 | 100 | 100 | 100 | 100 |
| SAMEA6654216.fasta | 100 | 99.32 | 100 | 100 | 100 | 100 | 100 | 100 | 100 | 100 | 100 |
| SAMEA6654217.fasta | 100 | 99.32 | 100 | 100 | 100 | 100 | 100 | 100 | 100 | 100 | 100 |
| SAMEA6654218.fasta | 100 | 99.32 | 100 | 100 | 100 | 100 | 100 | 100 | 100 | 100 | 100 |
| SAMEA7472332.fasta | 100 | 99.32 | . | . | . | . | . | . | . | . | 100 |
| SAMEA7472348.fasta | 100 | 99.32 | 100 | 100 | 100 | 100 | 100 | 100 | 100 | 100 | 100 |
| SAMN16197932.fasta | 100 | 99.32 | 100 | 100 | 100 | 100 | 100 | 100 | 100 | 100 | 100 |
| SAMN16197933.fasta | 100 | 99.32 | 100 | 100 | 100 | 100 | 100 | 100 | 100 | 100 | 100 |
| SAMN16197935.fasta | 100 | 99.32 | 100 | 100 | 100 | 100 | 100 | 100 | 100 | 100 | 100 |
| SAMN17981712.fasta | 100 | 99.32 | . | . | . | . | . | . | . | . | 100 |

Supplementary Material 2 Resistance genes within the genomes of 99 *K. pneumoniae* strains.

|  | **1** | **2** | **3** | **4** | **5** | **6** | **7** | **8** | **9** | **10** | **11** | **12** | **13** | **14** |
| --- | --- | --- | --- | --- | --- | --- | --- | --- | --- | --- | --- | --- | --- | --- |
| **AGRs** | **ARR-2** | **ARR-3** | **OqxA** | **OqxB** | **aac(3)-IIa** | **aac(3)-IId** | **aac(6')-Ib-cr** | **aadA1** | **aadA16** | **aadA2** | **aph(3'')-Ib** | **aph(3')-Ia** | **aph(6)-Id** |
| **A1** | 5 |  |  | 1 | 1 |  |  |  |  |  |  |  |  |  |
| **GCA_002186705.1** | 13 |  |  | 1 | 1 | 1 |  |  |  |  |  | 1 |  | 1 |
| **GCA_002186945.1** | 12 |  |  | 1 | 1 | 1 |  |  |  |  |  | 1 |  | 1 |
| **GCA_002187375.1** | 17 |  |  | 1 | 1 | 1 |  | 1 |  |  |  | 1 | 1 | 1 |
| **GCA_002187715.1** | 12 |  |  |  |  | 1 |  |  |  |  |  | 1 |  | 1 |
| **GCA_002188235.1** | 12 |  |  |  |  | 1 |  |  |  |  |  | 1 |  | 1 |
| **GCA_003195295.1** | 7 |  |  | 1 | 1 |  |  |  | 1 |  |  |  |  |  |
| **GCA_014788765.1** | 19 | 1 |  | 1 | 1 | 1 |  | 1 | 1 |  |  |  |  |  |
| **GCA_015720195.1** | 16 |  |  | 1 | 1 | 1 |  | 1 |  |  |  | 1 |  | 1 |
| **GCA_021920105.1** | 5 |  |  | 1 | 1 |  |  |  | 1 |  |  |  |  |  |
| **GCA_021920885.1** | 5 |  |  | 1 | 1 |  |  |  |  |  |  |  |  |  |
| **GCA_021920985.1** | 5 |  |  | 1 | 1 |  |  |  |  |  |  |  |  |  |
| **GCA_021925685.1** | 8 |  |  | 1 | 1 |  |  |  |  |  |  |  | 1 |  |
| **GCA_021926845.1** | 13 |  |  | 1 | 1 |  |  |  |  |  |  | 1 | 1 | 1 |
| **GCA_021928295.1** | 13 |  |  | 1 | 1 |  |  |  |  |  |  | 1 | 1 | 1 |
| **GCA_021928995.1** | 13 |  |  | 1 | 1 |  |  |  |  |  |  | 1 | 1 | 1 |
| **GCA_021929455.1** | 8 |  |  | 1 | 1 |  |  |  |  |  |  |  | 1 |  |
| **GCA_021933415.1** | 13 |  |  | 1 | 1 |  |  |  |  |  |  |  |  |  |
| **GCA_021956765.1** | 11 |  | 1 | 1 | 1 |  |  | 1 |  | 1 |  |  |  |  |
| **GCA_021957705.1** | 12 |  |  | 1 | 1 | 1 |  | 1 |  |  |  |  |  |  |
| **GCA_022048705.1** | 5 |  |  | 1 | 1 |  |  |  |  |  |  |  |  |  |
| **GCA_022061125.1** | 16 |  |  | 1 | 1 | 1 |  | 1 |  |  |  | 1 |  | 1 |
| **GCA_022084535.1** | 17 |  |  | 1 | 1 | 1 |  | 1 |  |  |  | 1 |  | 1 |
| **GCA_022176145.1** | 19 |  |  | 1 | 1 | 1 |  | 1 |  |  |  | 1 | 1 | 1 |
| **GCA_022176185.1** | 19 |  |  | 1 | 1 | 1 |  | 1 |  |  |  | 1 | 1 | 1 |
| **GCA_022176205.1** | 18 |  |  | 1 | 1 | 1 |  | 1 |  |  |  | 1 | 1 | 1 |
| **GCA_022176585.1** | 19 |  |  | 1 | 1 | 1 |  | 1 |  |  |  | 1 | 1 | 1 |
| **GCA_022176645.1** | 19 |  |  | 1 | 1 | 1 |  | 1 |  |  |  | 1 | 1 | 1 |
| **GCA_022233245.1** | 19 | 1 |  | 1 | 1 |  | 1 |  | 1 |  |  | 1 |  | 1 |
| **GCA_022233305.1** | 15 |  |  | 1 | 1 |  |  |  |  |  |  | 1 |  | 1 |
| **GCA_022233405.1** | 8 |  |  | 1 | 1 |  |  |  |  |  |  |  |  |  |
| **GCA_022250515.1** | 18 |  | 1 | 1 | 1 |  | 1 | 1 |  |  |  | 1 | 1 | 1 |
| **GCA_022270255.1** | 16 |  |  | 1 | 1 | 1 |  | 1 |  |  |  | 1 |  | 1 |
| **GCA_022270275.1** | 16 |  |  | 1 | 1 | 1 |  | 1 |  |  |  | 1 |  | 1 |
| **GCA_022270495.1** | 16 |  |  | 1 | 1 |  |  | 1 |  |  |  | 1 |  | 1 |
| **GCA_022270575.1** | 15 |  |  | 1 | 1 | 1 |  |  |  |  |  | 1 |  | 1 |
| **GCA_022270615.1** | 15 |  |  | 1 | 1 | 1 |  |  |  |  |  | 1 |  | 1 |
| **GCA_022270695.1** | 15 |  |  | 1 | 1 | 1 |  | 1 |  |  |  | 1 |  | 1 |
| **GCA_024392555.1** | 12 |  |  | 1 | 1 | 1 |  | 1 |  |  |  |  |  |  |
| **GCA_024474865.1** | 19 | 1 |  | 1 | 1 | 1 |  | 1 | 1 |  |  |  |  | 1 |
| **GCA_025101225.1** | 15 |  |  | 1 | 1 |  |  |  |  |  |  | 1 |  | 1 |
| **GCA_026361275.1** | 12 |  |  |  |  | 1 |  | 1 |  |  |  | 1 |  | 1 |
| **GCA_030786325.1** | 6 |  |  | 1 | 1 |  |  |  |  |  |  |  |  |  |
| **GCA_030820975.1** | 16 |  |  | 1 | 1 | 1 |  | 1 |  |  |  | 1 |  | 1 |
| **GCA_032044555.1** | 5 |  |  | 1 | 1 |  |  |  |  |  |  |  |  |  |
| **GCA_032046295.1** | 13 |  |  | 1 | 1 |  |  |  |  |  |  | 1 | 1 | 1 |
| **GCA_032062785.1** | 8 |  |  | 1 | 1 |  |  |  |  |  |  |  | 1 |  |
| **GCA_032066125.1** | 13 |  |  | 1 | 1 |  |  |  |  |  |  | 1 | 1 | 1 |
| **GCA_032066145.1** | 8 |  |  | 1 | 1 |  |  |  |  |  |  |  | 1 |  |
| **GCA_032070585.1** | 13 |  |  | 1 | 1 |  |  |  |  |  |  | 1 | 1 | 1 |
| **GCA_032070965.1** | 13 |  |  | 1 | 1 |  |  |  |  |  |  | 1 | 1 | 1 |
| **GCA_032072835.1** | 6 |  |  | 1 | 1 |  |  |  |  |  |  | 1 |  | 1 |
| **GCA_032077145.1** | 8 |  |  | 1 | 1 |  |  |  |  |  |  |  | 1 |  |
| **GCA_032128025.1** | 8 |  |  | 1 | 1 |  |  |  |  |  |  |  |  |  |
| **GCA_032129715.1** | 13 |  |  | 1 | 1 |  |  |  |  |  |  | 1 | 1 | 1 |
| **GCA_032132495.1** | 13 |  |  | 1 | 1 |  |  |  |  |  |  | 1 | 1 | 1 |
| **GCA_032132835.1** | 13 |  |  | 1 | 1 |  |  |  |  |  |  | 1 | 1 | 1 |
| **GCA_032134135.1** | 5 |  |  | 1 | 1 |  |  |  |  |  |  |  |  |  |
| **GCA_032134975.1** | 11 |  |  | 1 | 1 |  |  |  |  |  |  | 1 |  | 1 |
| **GCA_032137635.1** | 16 |  |  | 1 | 1 |  |  | 1 |  |  |  | 1 |  | 1 |
| **GCA_032153315.1** | 13 |  |  | 1 | 1 |  |  |  |  |  |  | 1 | 1 | 1 |
| **GCA_032155885.1** | 13 |  |  | 1 | 1 |  |  |  |  |  |  | 1 | 1 | 1 |
| **GCA_032411785.1** | 8 |  |  | 1 | 1 |  |  |  |  |  |  |  | 1 |  |
| **GCA_033106885.1** | 11 |  |  | 1 | 1 |  |  |  |  |  |  | 1 |  | 1 |
| **GCA_033107445.1** | 8 |  |  | 1 | 1 |  |  |  |  |  |  |  |  |  |
| **GCA_033108425.1** | 17 | 1 |  | 1 | 1 |  | 1 |  | 1 |  |  |  |  | 1 |
| **GCA_033122545.1** | 11 |  |  | 1 | 1 |  |  |  |  |  |  | 1 |  | 1 |
| **GCA_900181095.1** | 16 |  |  | 1 | 1 | 1 |  | 1 |  |  |  | 1 |  | 1 |
| **GCA_900502575.1** | 13 |  |  | 1 | 1 |  |  |  |  |  |  | 1 | 1 | 1 |
| **GCA_900503265.1** | 9 |  |  | 1 | 1 |  |  |  | 1 |  |  |  |  |  |
| **GCA_900504655.1** | 10 |  |  | 1 | 1 |  |  |  |  |  |  | 1 |  | 1 |
| **GCA_900504955.1** | 13 |  |  | 1 | 1 |  |  |  |  |  |  | 1 | 1 | 1 |
| **GCA_900506745.1** | 3 |  |  | 1 | 1 |  |  |  |  |  |  |  |  |  |
| **GCA_900512545.1** | 13 |  |  | 1 | 1 |  |  |  |  |  |  | 1 | 1 | 1 |
| **GCF_021441845.1** | 5 |  |  | 1 | 1 |  |  |  |  |  |  |  |  |  |
| **GCF_024495065.1** | 13 |  |  | 1 | 1 |  |  |  | 1 |  | 1 |  | 1 |  |
| **GCF_024495515.1** | 13 |  |  | 1 | 1 |  |  |  | 1 |  | 1 |  | 1 |  |
| **SAMEA113605448** | 7 |  |  | 1 | 1 |  |  |  |  |  |  | 1 |  | 1 |
| **SAMEA113605746** | 11 |  |  | 1 | 1 |  |  |  |  |  |  | 1 |  | 1 |
| **SAMEA2052930** | 8 |  |  | 1 | 1 |  |  |  |  |  |  |  | 1 |  |
| **SAMEA2633723** | 8 |  |  | 1 | 1 |  |  |  |  |  |  |  |  |  |
| **SAMEA3281566** | 12 |  |  | 1 | 1 |  |  |  |  |  |  | 1 |  | 1 |
| **SAMEA5758680** | 12 |  |  | 1 | 1 |  |  |  |  |  |  | 1 |  | 1 |
| **SAMEA6155812** | 24 |  |  | 1 | 1 | 1 |  | 1 |  |  |  |  | 1 | 1 |
| **SAMEA6155829** | 22 |  |  | 1 | 1 | 1 |  | 1 |  |  |  | 1 | 1 | 1 |
| **SAMEA6155886** | 19 |  |  | 1 | 1 | 1 |  | 1 |  |  |  |  | 1 | 1 |
| **SAMEA6156048** | 21 |  |  | 1 | 1 | 1 |  | 1 |  |  |  |  | 1 | 1 |
| **SAMEA6375606** | 12 |  | 1 | 1 | 1 |  |  | 1 |  | 1 |  |  |  |  |
| **SAMEA6635864** | 20 |  |  | 1 | 1 | 1 |  | 1 |  |  |  | 1 | 1 | 1 |
| **SAMEA6654214** | 19 |  |  | 1 | 1 | 1 |  | 1 |  |  |  | 1 | 1 | 1 |
| **SAMEA6654216** | 19 |  |  | 1 | 1 | 1 |  | 1 |  |  |  | 1 | 1 | 1 |
| **SAMEA6654217** | 19 |  |  | 1 | 1 | 1 |  | 1 |  |  |  | 1 | 1 | 1 |
| **SAMEA6654218** | 19 |  |  | 1 | 1 | 1 |  | 1 |  |  |  | 1 | 1 | 1 |
| **SAMEA7472332** | 18 | 1 |  | 1 | 1 | 1 |  | 1 | 1 |  |  | 1 |  | 1 |
| **SAMEA7472348** | 21 |  |  |  |  | 1 |  | 1 | 1 |  |  | 1 | 1 | 1 |
| **SAMN16197932** | 19 | 1 |  | 1 | 1 | 1 |  | 1 | 1 |  |  |  |  |  |
| **SAMN16197933** | 18 | 1 |  | 1 | 1 | 1 |  | 1 | 1 |  |  |  |  |  |
| **SAMN16197935** | 19 | 1 |  | 1 | 1 | 1 |  | 1 | 1 |  |  |  |  |  |
| **SAMN17981712** | 17 |  |  | 1 | 1 | 1 |  | 1 |  |  |  | 1 |  | 1 |

|  | **15** | **16** | **17** | **18** | **19** | **20** | **21** | **22** | **23** | **24** |
| --- | --- | --- | --- | --- | --- | --- | --- | --- | --- | --- |
| **blaCTX-M-15** | **blaCTX-M-2** | **blaCTX-M-55** | **blaDHA-1** | **blaKPC-2** | **blaLAP-2** | **blaNDM-1** | **blaNDM-14** | **blaOXA-1** | **blaOXA-10** |
| **A1** |  |  |  |  |  |  |  |  |  |  |
| **GCA_002186705.1** | 1 |  |  |  |  |  |  |  |  |  |
| **GCA_002186945.1** | 1 |  |  |  |  |  |  |  |  |  |
| **GCA_002187375.1** | 1 |  |  |  |  | 1 |  |  | 1 |  |
| **GCA_002187715.1** | 1 |  |  |  |  |  |  |  |  |  |
| **GCA_002188235.1** | 1 |  |  |  |  |  |  |  |  |  |
| **GCA_003195295.1** |  |  |  |  |  |  |  |  |  |  |
| **GCA_014788765.1** | 1 | 1 |  |  |  |  |  |  | 1 | 1 |
| **GCA_015720195.1** | 1 |  |  |  |  |  |  |  | 1 |  |
| **GCA_021920105.1** |  |  |  |  |  |  |  |  |  |  |
| **GCA_021920885.1** |  |  |  |  |  |  |  |  |  |  |
| **GCA_021920985.1** |  |  |  |  |  |  |  |  |  |  |
| **GCA_021925685.1** |  |  |  |  |  |  |  |  |  |  |
| **GCA_021926845.1** |  |  |  |  |  |  |  |  |  |  |
| **GCA_021928295.1** |  |  |  |  |  |  |  |  |  |  |
| **GCA_021928995.1** |  |  |  |  |  |  |  |  |  |  |
| **GCA_021929455.1** |  |  |  |  |  |  |  |  |  |  |
| **GCA_021933415.1** |  |  |  | 1 |  |  |  |  |  |  |
| **GCA_021956765.1** |  |  |  |  | 1 |  | 1 |  |  |  |
| **GCA_021957705.1** | 1 |  |  |  |  |  |  |  | 1 |  |
| **GCA_022048705.1** |  |  |  |  |  |  |  |  |  |  |
| **GCA_022061125.1** | 1 |  |  |  |  |  |  |  | 1 |  |
| **GCA_022084535.1** | 1 |  |  |  |  |  |  |  | 1 |  |
| **GCA_022176145.1** | 1 |  |  |  |  | 1 |  |  | 1 |  |
| **GCA_022176185.1** | 1 |  |  |  |  | 1 |  |  | 1 |  |
| **GCA_022176205.1** | 1 |  |  |  |  | 1 |  |  | 1 |  |
| **GCA_022176585.1** | 1 |  |  |  |  | 1 |  |  | 1 |  |
| **GCA_022176645.1** | 1 |  |  |  |  | 1 |  |  | 1 |  |
| **GCA_022233245.1** |  |  |  |  |  | 1 |  |  |  | 1 |
| **GCA_022233305.1** |  |  |  | 1 |  | 1 |  |  |  |  |
| **GCA_022233405.1** |  |  |  |  |  |  |  |  |  |  |
| **GCA_022250515.1** |  |  | 1 |  |  |  |  |  | 1 |  |
| **GCA_022270255.1** | 1 |  |  |  |  |  |  |  | 1 |  |
| **GCA_022270275.1** | 1 |  |  |  |  |  |  |  | 1 |  |
| **GCA_022270495.1** | 1 |  |  |  |  |  |  |  | 1 |  |
| **GCA_022270575.1** | 1 |  |  |  |  |  |  |  |  |  |
| **GCA_022270615.1** | 1 |  |  |  |  |  |  |  |  |  |
| **GCA_022270695.1** | 1 |  |  |  |  |  |  |  |  |  |
| **GCA_024392555.1** | 1 |  |  |  |  |  |  |  | 1 |  |
| **GCA_024474865.1** | 1 |  |  |  |  |  |  |  | 1 | 1 |
| **GCA_025101225.1** |  |  |  |  | 1 | 1 |  |  |  |  |
| **GCA_026361275.1** | 1 |  |  |  |  |  |  |  | 1 |  |
| **GCA_030786325.1** | 1 |  |  |  |  |  |  |  |  |  |
| **GCA_030820975.1** | 1 |  |  |  |  |  |  |  | 1 |  |
| **GCA_032044555.1** |  |  |  |  |  |  |  |  |  |  |
| **GCA_032046295.1** |  |  |  |  |  |  |  |  |  |  |
| **GCA_032062785.1** |  |  |  |  |  |  |  |  |  |  |
| **GCA_032066125.1** |  |  |  |  |  |  |  |  |  |  |
| **GCA_032066145.1** |  |  |  |  |  |  |  |  |  |  |
| **GCA_032070585.1** |  |  |  |  |  |  |  |  |  |  |
| **GCA_032070965.1** |  |  |  |  |  |  |  |  |  |  |
| **GCA_032072835.1** |  |  |  |  |  |  |  |  |  |  |
| **GCA_032077145.1** |  |  |  |  |  |  |  |  |  |  |
| **GCA_032128025.1** |  |  |  |  |  |  |  |  |  |  |
| **GCA_032129715.1** |  |  |  |  |  |  |  |  |  |  |
| **GCA_032132495.1** |  |  |  |  |  |  |  |  |  |  |
| **GCA_032132835.1** |  |  |  |  |  |  |  |  |  |  |
| **GCA_032134135.1** |  |  |  |  |  |  |  |  |  |  |
| **GCA_032134975.1** |  |  |  |  |  |  |  |  |  |  |
| **GCA_032137635.1** | 1 |  |  |  |  |  |  |  | 1 |  |
| **GCA_032153315.1** |  |  |  |  |  |  |  |  |  |  |
| **GCA_032155885.1** |  |  |  |  |  |  |  |  |  |  |
| **GCA_032411785.1** |  |  |  |  |  |  |  |  |  |  |
| **GCA_033106885.1** |  |  |  |  |  |  |  |  |  |  |
| **GCA_033107445.1** |  |  |  |  |  |  |  |  |  |  |
| **GCA_033108425.1** |  |  |  |  |  | 1 |  |  |  | 1 |
| **GCA_033122545.1** |  |  |  |  |  |  |  |  |  |  |
| **GCA_900181095.1** | 1 |  |  |  |  |  |  |  | 1 |  |
| **GCA_900502575.1** |  |  |  |  |  |  |  |  |  |  |
| **GCA_900503265.1** |  |  |  |  |  |  |  |  |  |  |
| **GCA_900504655.1** |  |  |  |  |  |  |  |  |  |  |
| **GCA_900504955.1** |  |  |  |  |  |  |  |  |  |  |
| **GCA_900506745.1** |  |  |  |  |  |  |  |  |  |  |
| **GCA_900512545.1** |  |  |  |  |  |  |  |  |  |  |
| **GCF_021441845.1** |  |  |  |  |  |  | 1 |  |  |  |
| **GCF_024495065.1** |  |  |  |  |  |  |  |  |  |  |
| **GCF_024495515.1** |  |  |  |  |  |  |  |  |  |  |
| **SAMEA113605448** |  |  |  |  |  |  |  |  |  |  |
| **SAMEA113605746** |  |  |  |  |  |  |  |  |  |  |
| **SAMEA2052930** |  |  |  |  |  |  |  |  |  |  |
| **SAMEA2633723** |  |  |  |  |  |  |  |  |  |  |
| **SAMEA3281566** |  |  |  |  |  |  |  |  |  |  |
| **SAMEA5758680** | 1 |  |  |  |  |  |  |  |  |  |
| **SAMEA6155812** | 1 |  |  |  |  | 1 |  |  | 1 |  |
| **SAMEA6155829** | 1 |  |  |  |  | 1 |  |  | 1 |  |
| **SAMEA6155886** | 1 |  |  |  |  | 1 |  |  | 1 |  |
| **SAMEA6156048** | 1 |  |  |  |  | 1 |  |  | 1 |  |
| **SAMEA6375606** |  |  |  |  | 1 |  | 1 |  |  |  |
| **SAMEA6635864** | 1 |  |  |  |  | 1 |  |  | 1 |  |
| **SAMEA6654214** | 1 |  |  |  |  | 1 |  |  | 1 |  |
| **SAMEA6654216** | 1 |  |  |  |  | 1 |  |  | 1 |  |
| **SAMEA6654217** | 1 |  |  |  |  | 1 |  |  | 1 |  |
| **SAMEA6654218** | 1 |  |  |  |  | 1 |  |  | 1 |  |
| **SAMEA7472332** | 1 |  |  |  |  |  |  |  | 1 | 1 |
| **SAMEA7472348** | 1 |  |  |  |  |  | 1 | 1 | 1 |  |
| **SAMN16197932** | 1 | 1 |  |  |  |  |  |  | 1 | 1 |
| **SAMN16197933** | 1 |  |  |  |  |  |  |  | 1 | 1 |
| **SAMN16197935** | 1 | 1 |  |  |  |  |  |  | 1 | 1 |
| **SAMN17981712** | 1 |  |  |  | 1 |  |  |  | 1 |  |

|  | **25** | **26** | **27** | **28** | **29** | **30** | **31** | **32** | **33** | **34** |
| --- | --- | --- | --- | --- | --- | --- | --- | --- | --- | --- |
| **blaOXA-181** | **blaSHV-1** | **blaSHV-103** | **blaSHV-110** | **blaSHV-12** | **blaSHV-191** | **blaSHV-27** | **blaSHV-40** | **blaSHV-56** | **blaSHV-79** |
| **A1** |  |  |  | 1 |  |  |  |  |  |  |
| **GCA_002186705.1** |  |  |  | 1 |  |  |  |  |  |  |
| **GCA_002186945.1** |  |  |  | 1 |  |  |  |  |  |  |
| **GCA_002187375.1** |  |  |  |  |  |  |  |  |  |  |
| **GCA_002187715.1** |  |  |  | 1 |  |  |  |  |  |  |
| **GCA_002188235.1** |  |  |  | 1 |  |  |  |  |  |  |
| **GCA_003195295.1** |  |  |  | 1 |  |  |  |  |  |  |
| **GCA_014788765.1** |  |  |  | 1 |  |  |  |  |  |  |
| **GCA_015720195.1** |  |  |  | 1 |  |  |  |  |  |  |
| **GCA_021920105.1** |  |  |  |  |  |  |  |  |  |  |
| **GCA_021920885.1** |  |  |  | 1 |  |  |  |  |  |  |
| **GCA_021920985.1** |  |  |  | 1 |  |  |  |  |  |  |
| **GCA_021925685.1** |  |  |  | 1 |  |  |  |  |  |  |
| **GCA_021926845.1** |  |  |  | 1 |  |  |  |  |  |  |
| **GCA_021928295.1** |  |  |  | 1 |  |  |  |  |  |  |
| **GCA_021928995.1** |  |  |  | 1 |  |  |  |  |  |  |
| **GCA_021929455.1** |  |  |  | 1 |  |  |  |  |  |  |
| **GCA_021933415.1** |  |  |  |  |  |  |  | 1 | 1 | 1 |
| **GCA_021956765.1** |  |  |  |  |  |  |  |  |  |  |
| **GCA_021957705.1** |  |  |  | 1 |  |  |  |  |  |  |
| **GCA_022048705.1** |  |  |  | 1 |  |  |  |  |  |  |
| **GCA_022061125.1** |  |  |  | 1 |  |  |  |  |  |  |
| **GCA_022084535.1** |  |  |  | 1 |  |  |  |  |  |  |
| **GCA_022176145.1** |  |  |  | 1 |  |  |  |  |  |  |
| **GCA_022176185.1** |  |  |  | 1 |  |  |  |  |  |  |
| **GCA_022176205.1** |  |  |  | 1 |  |  |  |  |  |  |
| **GCA_022176585.1** |  |  |  | 1 |  |  |  |  |  |  |
| **GCA_022176645.1** |  |  |  | 1 |  |  |  |  |  |  |
| **GCA_022233245.1** |  |  |  | 1 |  |  |  |  |  |  |
| **GCA_022233305.1** |  |  |  | 1 |  |  |  |  |  |  |
| **GCA_022233405.1** |  |  |  |  |  |  |  | 1 | 1 | 1 |
| **GCA_022250515.1** |  |  |  | 1 |  |  |  |  |  |  |
| **GCA_022270255.1** |  |  |  | 1 |  |  |  |  |  |  |
| **GCA_022270275.1** |  |  |  | 1 |  |  |  |  |  |  |
| **GCA_022270495.1** |  |  |  | 1 |  |  |  |  |  |  |
| **GCA_022270575.1** |  |  |  | 1 |  |  |  |  |  |  |
| **GCA_022270615.1** |  |  |  | 1 |  |  |  |  |  |  |
| **GCA_022270695.1** |  |  |  | 1 |  |  |  |  |  |  |
| **GCA_024392555.1** |  |  |  | 1 |  |  |  |  |  |  |
| **GCA_024474865.1** |  |  |  | 1 |  |  |  |  |  |  |
| **GCA_025101225.1** |  |  |  | 1 |  |  |  |  |  |  |
| **GCA_026361275.1** |  |  |  | 1 |  |  |  |  |  |  |
| **GCA_030786325.1** |  |  |  | 1 |  |  |  |  |  |  |
| **GCA_030820975.1** |  |  |  | 1 |  |  |  |  |  |  |
| **GCA_032044555.1** |  |  |  | 1 |  |  |  |  |  |  |
| **GCA_032046295.1** |  |  |  | 1 |  |  |  |  |  |  |
| **GCA_032062785.1** |  |  |  | 1 |  |  |  |  |  |  |
| **GCA_032066125.1** |  |  |  | 1 |  |  |  |  |  |  |
| **GCA_032066145.1** |  |  |  | 1 |  |  |  |  |  |  |
| **GCA_032070585.1** |  |  |  | 1 |  |  |  |  |  |  |
| **GCA_032070965.1** |  |  |  | 1 |  |  |  |  |  |  |
| **GCA_032072835.1** |  |  |  |  |  |  |  |  |  |  |
| **GCA_032077145.1** |  |  |  | 1 |  |  |  |  |  |  |
| **GCA_032128025.1** |  |  |  |  |  |  |  | 1 | 1 | 1 |
| **GCA_032129715.1** |  |  |  | 1 |  |  |  |  |  |  |
| **GCA_032132495.1** |  |  |  | 1 |  |  |  |  |  |  |
| **GCA_032132835.1** |  |  |  | 1 |  |  |  |  |  |  |
| **GCA_032134135.1** |  |  |  | 1 |  |  |  |  |  |  |
| **GCA_032134975.1** |  |  |  | 1 |  |  |  |  |  |  |
| **GCA_032137635.1** |  |  |  | 1 |  |  |  |  |  |  |
| **GCA_032153315.1** |  |  |  | 1 |  |  |  |  |  |  |
| **GCA_032155885.1** |  |  |  | 1 |  |  |  |  |  |  |
| **GCA_032411785.1** |  |  |  | 1 |  |  |  |  |  |  |
| **GCA_033106885.1** |  |  |  |  |  |  |  | 1 | 1 | 1 |
| **GCA_033107445.1** |  |  |  |  |  |  |  | 1 | 1 | 1 |
| **GCA_033108425.1** |  |  |  | 1 |  |  |  |  |  |  |
| **GCA_033122545.1** |  |  |  | 1 |  |  |  |  |  |  |
| **GCA_900181095.1** |  |  |  | 1 |  |  |  |  |  |  |
| **GCA_900502575.1** |  |  |  | 1 |  |  |  |  |  |  |
| **GCA_900503265.1** |  |  |  | 1 |  |  |  |  |  |  |
| **GCA_900504655.1** |  |  |  |  |  |  |  |  |  |  |
| **GCA_900504955.1** |  |  |  | 1 |  |  |  |  |  |  |
| **GCA_900506745.1** |  |  |  |  |  |  |  |  |  |  |
| **GCA_900512545.1** |  |  |  | 1 |  |  |  |  |  |  |
| **GCF_021441845.1** |  |  |  |  | 1 |  |  |  |  |  |
| **GCF_024495065.1** | 1 |  |  | 1 |  |  |  |  |  |  |
| **GCF_024495515.1** | 1 |  |  | 1 |  |  |  |  |  |  |
| **SAMEA113605448** |  | 1 |  |  |  |  |  |  |  |  |
| **SAMEA113605746** |  |  |  | 1 |  |  |  |  |  |  |
| **SAMEA2052930** |  |  |  | 1 |  |  |  |  |  |  |
| **SAMEA2633723** |  |  |  |  |  |  |  | 1 | 1 | 1 |
| **SAMEA3281566** |  |  |  | 1 |  |  |  |  |  |  |
| **SAMEA5758680** |  |  |  | 1 |  |  |  |  |  |  |
| **SAMEA6155812** |  |  | 1 | 1 |  | 1 | 1 |  |  |  |
| **SAMEA6155829** |  |  |  | 1 |  |  |  |  |  |  |
| **SAMEA6155886** |  |  |  |  |  |  |  |  |  |  |
| **SAMEA6156048** |  |  |  | 1 |  |  |  |  |  |  |
| **SAMEA6375606** |  |  |  |  | 1 |  |  |  |  |  |
| **SAMEA6635864** |  |  |  |  |  |  |  |  |  |  |
| **SAMEA6654214** |  |  |  | 1 |  |  |  |  |  |  |
| **SAMEA6654216** |  |  |  | 1 |  |  |  |  |  |  |
| **SAMEA6654217** |  |  |  | 1 |  |  |  |  |  |  |
| **SAMEA6654218** |  |  |  | 1 |  |  |  |  |  |  |
| **SAMEA7472332** |  |  |  | 1 |  |  |  |  |  |  |
| **SAMEA7472348** | 1 |  |  | 1 |  |  |  |  |  |  |
| **SAMN16197932** |  |  |  | 1 |  |  |  |  |  |  |
| **SAMN16197933** |  |  |  | 1 |  |  |  |  |  |  |
| **SAMN16197935** |  |  |  | 1 |  |  |  |  |  |  |
| **SAMN17981712** |  | 1 |  |  |  |  |  |  |  |  |

|  | **35** | **36** | **37** | **38** | **39** | **40** | **41** | **42** | **43** | **44** | **45** | **46** | **47** |
| --- | --- | --- | --- | --- | --- | --- | --- | --- | --- | --- | --- | --- | --- |
| **blaSHV-81** | **blaSHV-85** | **blaSHV-89** | **blaTEM-1B** | **catA1** | **catA2** | **catB3** | **cmlA1** | **dfrA1** | **dfrA12** | **dfrA14** | **dfrA15** | **dfrA17** |
| **A1** | 1 |  |  |  |  |  |  |  |  |  |  |  |  |
| **GCA_002186705.1** | 1 |  |  | 1 |  | 1 |  |  |  |  | 1 |  |  |
| **GCA_002186945.1** | 1 |  |  | 1 |  |  |  |  |  |  | 1 |  |  |
| **GCA_002187375.1** |  |  |  |  | 1 |  |  |  |  |  |  | 1 |  |
| **GCA_002187715.1** | 1 |  |  | 1 |  | 1 |  |  |  |  | 1 |  |  |
| **GCA_002188235.1** | 1 |  |  | 1 |  | 1 |  |  |  |  | 1 |  |  |
| **GCA_003195295.1** | 1 |  |  |  |  |  |  |  |  |  |  |  |  |
| **GCA_014788765.1** | 1 |  |  |  |  |  |  | 1 |  |  | 1 |  |  |
| **GCA_015720195.1** | 1 |  |  | 1 |  |  |  |  |  |  | 1 |  |  |
| **GCA_021920105.1** |  |  |  |  |  |  |  |  |  |  |  |  |  |
| **GCA_021920885.1** | 1 |  |  |  |  |  |  |  |  |  |  |  |  |
| **GCA_021920985.1** | 1 |  |  |  |  |  |  |  |  |  |  |  |  |
| **GCA_021925685.1** | 1 |  |  |  |  |  |  |  |  |  | 1 |  |  |
| **GCA_021926845.1** | 1 |  |  | 1 |  |  |  |  |  |  | 1 |  |  |
| **GCA_021928295.1** | 1 |  |  | 1 |  |  |  |  |  |  | 1 |  |  |
| **GCA_021928995.1** | 1 |  |  | 1 |  |  |  |  |  |  | 1 |  |  |
| **GCA_021929455.1** | 1 |  |  |  |  |  |  |  |  |  | 1 |  |  |
| **GCA_021933415.1** |  | 1 | 1 |  |  |  |  |  |  |  |  |  | 1 |
| **GCA_021956765.1** |  |  |  |  |  |  |  |  |  |  |  |  |  |
| **GCA_021957705.1** | 1 |  |  |  |  |  |  |  |  |  | 1 |  |  |
| **GCA_022048705.1** | 1 |  |  |  |  |  |  |  |  |  |  |  |  |
| **GCA_022061125.1** | 1 |  |  | 1 |  |  |  |  |  |  | 1 |  |  |
| **GCA_022084535.1** | 1 |  |  | 1 |  |  |  |  |  |  | 1 |  |  |
| **GCA_022176145.1** | 1 |  |  |  | 1 |  |  |  |  |  |  | 1 |  |
| **GCA_022176185.1** | 1 |  |  |  | 1 |  |  |  |  |  |  | 1 |  |
| **GCA_022176205.1** | 1 |  |  |  |  |  |  |  |  |  |  | 1 |  |
| **GCA_022176585.1** | 1 |  |  |  | 1 |  |  |  |  |  |  | 1 |  |
| **GCA_022176645.1** | 1 |  |  |  | 1 |  |  |  |  |  |  | 1 |  |
| **GCA_022233245.1** | 1 |  |  |  |  |  |  | 1 |  |  | 1 |  |  |
| **GCA_022233305.1** | 1 |  |  |  |  |  |  |  | 1 |  |  |  |  |
| **GCA_022233405.1** |  | 1 | 1 |  |  |  |  |  |  |  |  |  |  |
| **GCA_022250515.1** | 1 |  |  |  |  |  | 1 |  |  |  |  |  |  |
| **GCA_022270255.1** | 1 |  |  |  | 1 |  |  |  |  |  | 1 |  |  |
| **GCA_022270275.1** | 1 |  |  | 1 |  |  |  |  |  |  | 1 |  |  |
| **GCA_022270495.1** | 1 |  |  | 1 | 1 |  |  |  |  |  | 1 |  |  |
| **GCA_022270575.1** | 1 |  |  | 1 | 1 |  |  |  |  |  | 1 |  |  |
| **GCA_022270615.1** | 1 |  |  | 1 | 1 |  |  |  |  |  | 1 |  |  |
| **GCA_022270695.1** | 1 |  |  | 1 |  |  |  |  |  |  | 1 |  |  |
| **GCA_024392555.1** | 1 |  |  |  |  |  |  |  |  |  | 1 |  |  |
| **GCA_024474865.1** | 1 |  |  | 1 |  | 1 |  | 1 |  |  | 1 |  |  |
| **GCA_025101225.1** | 1 |  |  |  |  |  |  |  |  |  |  |  |  |
| **GCA_026361275.1** | 1 |  |  | 1 |  |  |  |  |  |  | 1 |  |  |
| **GCA_030786325.1** | 1 |  |  |  |  |  |  |  |  |  |  |  |  |
| **GCA_030820975.1** | 1 |  |  | 1 |  |  |  |  |  |  | 1 |  |  |
| **GCA_032044555.1** | 1 |  |  |  |  |  |  |  |  |  |  |  |  |
| **GCA_032046295.1** | 1 |  |  | 1 |  |  |  |  |  |  | 1 |  |  |
| **GCA_032062785.1** | 1 |  |  |  |  |  |  |  |  |  | 1 |  |  |
| **GCA_032066125.1** | 1 |  |  | 1 |  |  |  |  |  |  | 1 |  |  |
| **GCA_032066145.1** | 1 |  |  |  |  |  |  |  |  |  | 1 |  |  |
| **GCA_032070585.1** | 1 |  |  | 1 |  |  |  |  |  |  | 1 |  |  |
| **GCA_032070965.1** | 1 |  |  | 1 |  |  |  |  |  |  | 1 |  |  |
| **GCA_032072835.1** |  |  |  |  |  |  |  |  |  |  |  |  |  |
| **GCA_032077145.1** | 1 |  |  |  |  |  |  |  |  |  | 1 |  |  |
| **GCA_032128025.1** |  | 1 | 1 |  |  |  |  |  |  |  |  |  |  |
| **GCA_032129715.1** | 1 |  |  | 1 |  |  |  |  |  |  | 1 |  |  |
| **GCA_032132495.1** | 1 |  |  | 1 |  |  |  |  |  |  | 1 |  |  |
| **GCA_032132835.1** | 1 |  |  | 1 |  |  |  |  |  |  | 1 |  |  |
| **GCA_032134135.1** | 1 |  |  |  |  |  |  |  |  |  |  |  |  |
| **GCA_032134975.1** | 1 |  |  | 1 |  |  |  |  |  |  | 1 |  |  |
| **GCA_032137635.1** | 1 |  |  | 1 |  |  |  |  |  |  | 1 |  |  |
| **GCA_032153315.1** | 1 |  |  | 1 |  |  |  |  |  |  | 1 |  |  |
| **GCA_032155885.1** | 1 |  |  | 1 |  |  |  |  |  |  | 1 |  |  |
| **GCA_032411785.1** | 1 |  |  |  |  |  |  |  |  |  | 1 |  |  |
| **GCA_033106885.1** |  | 1 | 1 |  |  |  |  |  |  |  |  |  |  |
| **GCA_033107445.1** |  | 1 | 1 |  |  |  |  |  |  |  |  |  |  |
| **GCA_033108425.1** | 1 |  |  |  |  |  |  | 1 |  |  | 1 |  |  |
| **GCA_033122545.1** | 1 |  |  | 1 |  |  |  |  |  |  | 1 |  |  |
| **GCA_900181095.1** | 1 |  |  | 1 |  |  |  |  |  |  | 1 |  |  |
| **GCA_900502575.1** | 1 |  |  | 1 |  |  |  |  |  |  | 1 |  |  |
| **GCA_900503265.1** | 1 |  |  |  |  |  |  |  | 1 |  |  |  |  |
| **GCA_900504655.1** |  |  |  |  | 1 |  |  |  |  |  |  | 1 |  |
| **GCA_900504955.1** | 1 |  |  | 1 |  |  |  |  |  |  | 1 |  |  |
| **GCA_900506745.1** |  |  |  |  |  |  |  |  |  |  |  |  |  |
| **GCA_900512545.1** | 1 |  |  | 1 |  |  |  |  |  |  | 1 |  |  |
| **GCF_021441845.1** |  |  |  |  |  |  |  |  |  |  |  |  |  |
| **GCF_024495065.1** | 1 |  |  |  |  |  |  | 1 |  | 1 |  |  |  |
| **GCF_024495515.1** | 1 |  |  |  |  |  |  | 1 |  | 1 |  |  |  |
| **SAMEA113605448** |  |  |  |  |  |  |  |  |  |  |  |  |  |
| **SAMEA113605746** | 1 |  |  | 1 |  |  |  |  |  |  | 1 |  |  |
| **SAMEA2052930** | 1 |  |  |  |  |  |  |  |  |  | 1 |  |  |
| **SAMEA2633723** |  | 1 | 1 |  |  |  |  |  |  |  |  |  |  |
| **SAMEA3281566** | 1 |  |  | 1 |  | 1 |  |  |  |  | 1 |  |  |
| **SAMEA5758680** | 1 |  |  | 1 |  |  |  |  |  |  | 1 |  |  |
| **SAMEA6155812** | 1 |  |  | 1 | 1 |  |  |  |  |  | 1 | 1 |  |
| **SAMEA6155829** | 1 |  |  | 1 | 1 |  |  |  |  |  | 1 | 1 |  |
| **SAMEA6155886** |  |  |  | 1 | 1 |  |  |  |  |  | 1 | 1 |  |
| **SAMEA6156048** | 1 |  |  | 1 | 1 |  |  |  |  |  | 1 | 1 |  |
| **SAMEA6375606** |  |  |  |  |  |  |  |  |  |  |  |  |  |
| **SAMEA6635864** |  |  |  | 1 | 1 |  |  |  |  |  | 1 | 1 |  |
| **SAMEA6654214** | 1 |  |  |  | 1 |  |  |  |  |  |  | 1 |  |
| **SAMEA6654216** | 1 |  |  |  | 1 |  |  |  |  |  |  | 1 |  |
| **SAMEA6654217** | 1 |  |  |  | 1 |  |  |  |  |  |  | 1 |  |
| **SAMEA6654218** | 1 |  |  |  | 1 |  |  |  |  |  |  | 1 |  |
| **SAMEA7472332** | 1 |  |  |  |  | 1 |  | 1 |  |  | 1 |  |  |
| **SAMEA7472348** | 1 |  |  | 1 |  |  |  |  |  |  | 1 |  |  |
| **SAMN16197932** | 1 |  |  |  |  |  |  | 1 |  |  | 1 |  |  |
| **SAMN16197933** | 1 |  |  |  |  |  |  | 1 |  |  | 1 |  |  |
| **SAMN16197935** | 1 |  |  |  |  |  |  | 1 |  |  | 1 |  |  |
| **SAMN17981712** |  |  |  |  |  |  |  |  |  |  | 1 |  |  |

Supplementary Material 3 Diversity of single nucleotide polymorphisms (SNPs) among 99 *K. pneumoniae* strains.

| **snp-dists 0.8.2** | | **1** | **2** | **3** | **4** | **5** | **6** | **7** |
| --- | --- | --- | --- | --- | --- | --- | --- | --- |
| **A1** | **GCA_002186705.1** | **GCA_002186945.1** | **GCA_002187375.1** | **GCA_002187715.1** | **GCA_002188235.1** | **GCA_003195295.1** |
| **1** | **A1** | 0 | 192 | 192 | 3967 | 287 | 277 | 647 |
| **2** | **GCA_002186705.1** | 192 | 0 | 18 | 3935 | 165 | 155 | 569 |
| **3** | **GCA_002186945.1** | 192 | 18 | 0 | 3935 | 165 | 155 | 569 |
| **4** | **GCA_002187375.1** | 3967 | 3935 | 3935 | 0 | 4028 | 4018 | 4294 |
| **5** | **GCA_002187715.1** | 287 | 165 | 165 | 4028 | 0 | 36 | 663 |
| **6** | **GCA_002188235.1** | 277 | 155 | 155 | 4018 | 36 | 0 | 653 |
| **7** | **GCA_003195295.1** | 647 | 569 | 569 | 4294 | 663 | 653 | 0 |
| **8** | **GCA_014788765.1** | 3141 | 3129 | 3129 | 1440 | 3224 | 3214 | 3541 |
| **9** | **GCA_015720195.1** | 3153 | 3139 | 3139 | 1454 | 3234 | 3224 | 3550 |
| **10** | **GCA_021441845.1** | 123 | 219 | 219 | 3997 | 314 | 304 | 678 |
| **11** | **GCA_021920105.1** | 187 | 107 | 107 | 3929 | 202 | 192 | 561 |
| **12** | **GCA_021920885.1** | 1447 | 1433 | 1433 | 3222 | 1528 | 1518 | 1855 |
| **13** | **GCA_021920985.1** | 1452 | 1438 | 1438 | 3227 | 1533 | 1523 | 1860 |
| **14** | **GCA_021925685.1** | 1457 | 1445 | 1445 | 3230 | 1540 | 1530 | 1866 |
| **15** | **GCA_021926845.1** | 1454 | 1442 | 1442 | 3226 | 1537 | 1527 | 1865 |
| **16** | **GCA_021928295.1** | 1440 | 1426 | 1426 | 3215 | 1521 | 1511 | 1849 |
| **17** | **GCA_021928995.1** | 1470 | 1457 | 1457 | 3239 | 1552 | 1542 | 1878 |
| **18** | **GCA_021929455.1** | 1463 | 1451 | 1451 | 3236 | 1546 | 1536 | 1874 |
| **19** | **GCA_021933415.1** | 10488 | 10470 | 10468 | 10857 | 10569 | 10560 | 10688 |
| **20** | **GCA_021956765.1** | 3244 | 3232 | 3232 | 1523 | 3327 | 3317 | 3643 |
| **21** | **GCA_021957705.1** | 3117 | 3105 | 3105 | 1417 | 3200 | 3190 | 3514 |
| **22** | **GCA_022048705.1** | 208 | 108 | 108 | 3973 | 195 | 185 | 608 |
| **23** | **GCA_022061125.1** | 3120 | 3106 | 3106 | 1396 | 3201 | 3191 | 3511 |
| **24** | **GCA_022084535.1** | 3103 | 3089 | 3089 | 1403 | 3184 | 3174 | 3501 |
| **25** | **GCA_022176145.1** | 3968 | 3933 | 3935 | 54 | 4028 | 4018 | 4293 |
| **26** | **GCA_022176185.1** | 3966 | 3931 | 3933 | 51 | 4026 | 4016 | 4291 |
| **27** | **GCA_022176205.1** | 3973 | 3938 | 3940 | 57 | 4033 | 4023 | 4296 |
| **28** | **GCA_022176585.1** | 3972 | 3937 | 3939 | 57 | 4032 | 4022 | 4297 |
| **29** | **GCA_022176645.1** | 3969 | 3934 | 3936 | 54 | 4029 | 4019 | 4294 |
| **30** | **GCA_022233245.1** | 190 | 180 | 180 | 3956 | 275 | 265 | 638 |
| **31** | **GCA_022233305.1** | 213 | 203 | 203 | 3979 | 298 | 288 | 657 |
| **32** | **GCA_022233405.1** | 10449 | 10431 | 10431 | 10822 | 10532 | 10524 | 10650 |
| **33** | **GCA_022250515.1** | 1421 | 1407 | 1407 | 3196 | 1502 | 1492 | 1828 |
| **34** | **GCA_022270255.1** | 1444 | 1432 | 1432 | 3218 | 1527 | 1517 | 1856 |
| **35** | **GCA_022270275.1** | 1487 | 1477 | 1477 | 3262 | 1572 | 1562 | 1899 |
| **36** | **GCA_022270495.1** | 1469 | 1455 | 1455 | 3244 | 1550 | 1540 | 1874 |
| **37** | **GCA_022270575.1** | 1447 | 1433 | 1433 | 3221 | 1528 | 1518 | 1857 |
| **38** | **GCA_022270615.1** | 1449 | 1437 | 1437 | 3224 | 1532 | 1522 | 1860 |
| **39** | **GCA_022270695.1** | 1465 | 1455 | 1455 | 3240 | 1550 | 1540 | 1875 |
| **40** | **GCA_024392555.1** | 3129 | 3115 | 3115 | 1429 | 3210 | 3200 | 3527 |
| **41** | **GCA_024474865.1** | 205 | 193 | 193 | 3972 | 287 | 278 | 651 |
| **42** | **GCA_025101225.1** | 198 | 186 | 186 | 3965 | 281 | 271 | 640 |
| **43** | **GCA_026361275.1** | 241 | 121 | 121 | 3984 | 168 | 158 | 615 |
| **44** | **GCA_030786325.1** | 245 | 167 | 167 | 3983 | 262 | 252 | 563 |
| **45** | **GCA_030820975.1** | 3112 | 3102 | 3102 | 1412 | 3197 | 3187 | 3512 |
| **46** | **GCA_032044555.1** | 1448 | 1435 | 1435 | 3221 | 1530 | 1520 | 1859 |
| **47** | **GCA_032046295.1** | 1465 | 1455 | 1455 | 3236 | 1550 | 1540 | 1875 |
| **48** | **GCA_032062785.1** | 1440 | 1428 | 1428 | 3214 | 1523 | 1513 | 1851 |
| **49** | **GCA_032066125.1** | 1470 | 1456 | 1456 | 3245 | 1551 | 1541 | 1873 |
| **50** | **GCA_032066145.1** | 1444 | 1432 | 1432 | 3216 | 1527 | 1517 | 1853 |
| **51** | **GCA_032070585.1** | 1441 | 1427 | 1427 | 3214 | 1522 | 1512 | 1849 |
| **52** | **GCA_032070965.1** | 1445 | 1431 | 1431 | 3220 | 1526 | 1516 | 1854 |
| **53** | **GCA_032072835.1** | 180 | 102 | 102 | 3920 | 197 | 187 | 558 |
| **54** | **GCA_032077145.1** | 1442 | 1430 | 1430 | 3215 | 1525 | 1515 | 1853 |
| **55** | **GCA_032128025.1** | 11070 | 11053 | 11051 | 11442 | 11152 | 11144 | 11272 |
| **56** | **GCA_032129715.1** | 1446 | 1435 | 1435 | 3221 | 1530 | 1520 | 1855 |
| **57** | **GCA_032132495.1** | 1467 | 1455 | 1455 | 3241 | 1550 | 1540 | 1878 |
| **58** | **GCA_032132835.1** | 1474 | 1460 | 1460 | 3276 | 1555 | 1545 | 1883 |
| **59** | **GCA_032134135.1** | 525 | 515 | 516 | 4276 | 610 | 601 | 957 |
| **60** | **GCA_032134975.1** | 1456 | 1445 | 1445 | 3230 | 1540 | 1530 | 1866 |
| **61** | **GCA_032137635.1** | 1443 | 1429 | 1429 | 3218 | 1524 | 1514 | 1852 |
| **62** | **GCA_032153315.1** | 1446 | 1432 | 1432 | 3221 | 1527 | 1517 | 1855 |
| **63** | **GCA_032155885.1** | 1441 | 1429 | 1429 | 3215 | 1523 | 1513 | 1853 |
| **64** | **GCA_032411785.1** | 1449 | 1435 | 1435 | 3223 | 1530 | 1520 | 1858 |
| **65** | **GCA_033106885.1** | 10474 | 10453 | 10451 | 10870 | 10553 | 10545 | 10668 |
| **66** | **GCA_033107445.1** | 10473 | 10453 | 10453 | 10845 | 10554 | 10546 | 10673 |
| **67** | **GCA_033108425.1** | 744 | 736 | 735 | 4332 | 818 | 819 | 1163 |
| **68** | **GCA_033122545.1** | 1548 | 1535 | 1535 | 3322 | 1629 | 1619 | 1952 |
| **69** | **GCA_900181095.1** | 1501 | 1469 | 1469 | 3252 | 1564 | 1554 | 1889 |
| **70** | **GCA_900502575.1** | 1432 | 1422 | 1422 | 3207 | 1517 | 1507 | 1843 |
| **71** | **GCA_900503265.1** | 3113 | 3103 | 3103 | 1415 | 3198 | 3188 | 3515 |
| **72** | **GCA_900504655.1** | 3921 | 3889 | 3889 | 82 | 3982 | 3972 | 4249 |
| **73** | **GCA_900504955.1** | 1432 | 1422 | 1422 | 3205 | 1517 | 1507 | 1844 |
| **74** | **GCA_900506745.1** | 3115 | 3105 | 3105 | 1401 | 3200 | 3190 | 3514 |
| **75** | **GCA_900512545.1** | 1438 | 1426 | 1426 | 3212 | 1521 | 1511 | 1849 |
| **76** | **GCF_024495065.1** | 49 | 171 | 171 | 3949 | 266 | 256 | 630 |
| **77** | **GCF_024495515.1** | 50 | 172 | 172 | 3951 | 267 | 257 | 631 |
| **78** | **SAMEA113605448** | 190 | 110 | 110 | 3924 | 205 | 195 | 564 |
| **79** | **SAMEA113605746** | 1718 | 1708 | 1707 | 3420 | 1803 | 1792 | 2121 |
| **80** | **SAMEA2052930** | 1441 | 1431 | 1431 | 3217 | 1526 | 1516 | 1852 |
| **81** | **SAMEA2633723** | 10460 | 10442 | 10440 | 10830 | 10541 | 10533 | 10663 |
| **82** | **SAMEA3281566** | 200 | 190 | 190 | 3962 | 285 | 275 | 647 |
| **83** | **SAMEA5758680** | 1435 | 1423 | 1423 | 3209 | 1518 | 1508 | 1847 |
| **84** | **SAMEA6155812** | 3970 | 3941 | 3941 | 34 | 4034 | 4024 | 4295 |
| **85** | **SAMEA6155829** | 3969 | 3938 | 3938 | 34 | 4031 | 4021 | 4295 |
| **86** | **SAMEA6155886** | 3970 | 3941 | 3941 | 34 | 4034 | 4024 | 4295 |
| **87** | **SAMEA6156048** | 3969 | 3938 | 3938 | 34 | 4031 | 4021 | 4295 |
| **88** | **SAMEA6375606** | 3183 | 3171 | 3171 | 1462 | 3266 | 3256 | 3584 |
| **89** | **SAMEA6635864** | 3969 | 3938 | 3938 | 34 | 4031 | 4021 | 4295 |
| **90** | **SAMEA6654214** | 3969 | 3934 | 3936 | 54 | 4029 | 4019 | 4294 |
| **91** | **SAMEA6654216** | 3971 | 3936 | 3938 | 56 | 4031 | 4021 | 4296 |
| **92** | **SAMEA6654217** | 3995 | 3959 | 3961 | 77 | 4055 | 4045 | 4320 |
| **93** | **SAMEA6654218** | 3982 | 3945 | 3947 | 66 | 4040 | 4030 | 4304 |
| **94** | **SAMEA7472332** | 1487 | 1451 | 1451 | 3237 | 1546 | 1536 | 1871 |
| **95** | **SAMEA7472348** | 272 | 154 | 154 | 4005 | 202 | 192 | 644 |
| **96** | **SAMN16197932** | 3142 | 3130 | 3130 | 1441 | 3225 | 3215 | 3542 |
| **97** | **SAMN16197933** | 3144 | 3132 | 3132 | 1443 | 3227 | 3217 | 3544 |
| **98** | **SAMN16197935** | 3141 | 3129 | 3129 | 1440 | 3224 | 3214 | 3541 |
| **99** | **SAMN17981712** | 180 | 94 | 94 | 3943 | 189 | 179 | 578 |

| **snp-dists 0.8.2** | | **8** | **9** | **10** | **11** | **12** | **13** | **14** |
| --- | --- | --- | --- | --- | --- | --- | --- | --- |
| **GCA_014788765.1** | **GCA_015720195.1** | **GCA_021441845.1** | **GCA_021920105.1** | **GCA_021920885.1** | **GCA_021920985.1** | **GCA_021925685.1** |
| **1** | **A1** | 3141 | 3153 | 123 | 187 | 1447 | 1452 | 1457 |
| **2** | **GCA_002186705.1** | 3129 | 3139 | 219 | 107 | 1433 | 1438 | 1445 |
| **3** | **GCA_002186945.1** | 3129 | 3139 | 219 | 107 | 1433 | 1438 | 1445 |
| **4** | **GCA_002187375.1** | 1440 | 1454 | 3997 | 3929 | 3222 | 3227 | 3230 |
| **5** | **GCA_002187715.1** | 3224 | 3234 | 314 | 202 | 1528 | 1533 | 1540 |
| **6** | **GCA_002188235.1** | 3214 | 3224 | 304 | 192 | 1518 | 1523 | 1530 |
| **7** | **GCA_003195295.1** | 3541 | 3550 | 678 | 561 | 1855 | 1860 | 1866 |
| **8** | **GCA_014788765.1** | 0 | 125 | 3169 | 3123 | 2003 | 2008 | 2014 |
| **9** | **GCA_015720195.1** | 125 | 0 | 3179 | 3133 | 2016 | 2021 | 2027 |
| **10** | **GCA_021441845.1** | 3169 | 3179 | 0 | 214 | 1473 | 1478 | 1485 |
| **11** | **GCA_021920105.1** | 3123 | 3133 | 214 | 0 | 1426 | 1431 | 1439 |
| **12** | **GCA_021920885.1** | 2003 | 2016 | 1473 | 1426 | 0 | 11 | 223 |
| **13** | **GCA_021920985.1** | 2008 | 2021 | 1478 | 1431 | 11 | 0 | 228 |
| **14** | **GCA_021925685.1** | 2014 | 2027 | 1485 | 1439 | 223 | 228 | 0 |
| **15** | **GCA_021926845.1** | 2011 | 2024 | 1482 | 1437 | 221 | 226 | 54 |
| **16** | **GCA_021928295.1** | 1996 | 2009 | 1466 | 1419 | 203 | 208 | 36 |
| **17** | **GCA_021928995.1** | 2021 | 2034 | 1497 | 1452 | 236 | 241 | 69 |
| **18** | **GCA_021929455.1** | 2020 | 2033 | 1491 | 1440 | 230 | 235 | 57 |
| **19** | **GCA_021933415.1** | 10258 | 10271 | 10518 | 10468 | 9705 | 9710 | 9717 |
| **20** | **GCA_021956765.1** | 283 | 296 | 3238 | 3226 | 2100 | 2105 | 2117 |
| **21** | **GCA_021957705.1** | 87 | 81 | 3145 | 3099 | 1979 | 1984 | 1989 |
| **22** | **GCA_022048705.1** | 3145 | 3155 | 235 | 145 | 1449 | 1454 | 1461 |
| **23** | **GCA_022061125.1** | 89 | 82 | 3146 | 3100 | 1980 | 1985 | 1991 |
| **24** | **GCA_022084535.1** | 72 | 65 | 3129 | 3083 | 1963 | 1968 | 1974 |
| **25** | **GCA_022176145.1** | 1444 | 1455 | 3997 | 3930 | 3220 | 3225 | 3233 |
| **26** | **GCA_022176185.1** | 1441 | 1452 | 3995 | 3927 | 3220 | 3225 | 3231 |
| **27** | **GCA_022176205.1** | 1446 | 1459 | 4002 | 3934 | 3227 | 3232 | 3236 |
| **28** | **GCA_022176585.1** | 1447 | 1458 | 4001 | 3933 | 3226 | 3231 | 3237 |
| **29** | **GCA_022176645.1** | 1444 | 1455 | 3998 | 3930 | 3223 | 3228 | 3234 |
| **30** | **GCA_022233245.1** | 3131 | 3141 | 219 | 175 | 1435 | 1440 | 1447 |
| **31** | **GCA_022233305.1** | 3154 | 3164 | 242 | 198 | 1458 | 1463 | 1470 |
| **32** | **GCA_022233405.1** | 10221 | 10237 | 10481 | 10431 | 9670 | 9675 | 9677 |
| **33** | **GCA_022250515.1** | 1977 | 1990 | 1447 | 1400 | 184 | 189 | 197 |
| **34** | **GCA_022270255.1** | 2002 | 2015 | 1472 | 1425 | 209 | 214 | 108 |
| **35** | **GCA_022270275.1** | 2045 | 2060 | 1517 | 1470 | 254 | 259 | 151 |
| **36** | **GCA_022270495.1** | 2025 | 2038 | 1495 | 1448 | 232 | 237 | 131 |
| **37** | **GCA_022270575.1** | 2002 | 2015 | 1473 | 1428 | 212 | 217 | 111 |
| **38** | **GCA_022270615.1** | 2006 | 2020 | 1477 | 1430 | 214 | 219 | 112 |
| **39** | **GCA_022270695.1** | 2023 | 2038 | 1495 | 1448 | 232 | 237 | 129 |
| **40** | **GCA_024392555.1** | 98 | 91 | 3155 | 3109 | 1989 | 1994 | 2000 |
| **41** | **GCA_024474865.1** | 3144 | 3154 | 232 | 188 | 1448 | 1453 | 1460 |
| **42** | **GCA_025101225.1** | 3137 | 3147 | 225 | 181 | 1441 | 1446 | 1453 |
| **43** | **GCA_026361275.1** | 3178 | 3196 | 270 | 158 | 1484 | 1489 | 1494 |
| **44** | **GCA_030786325.1** | 3179 | 3190 | 274 | 162 | 1488 | 1493 | 1499 |
| **45** | **GCA_030820975.1** | 83 | 78 | 3142 | 3096 | 1976 | 1981 | 1985 |
| **46** | **GCA_032044555.1** | 2006 | 2019 | 1476 | 1429 | 213 | 218 | 138 |
| **47** | **GCA_032046295.1** | 2019 | 2034 | 1495 | 1450 | 234 | 239 | 65 |
| **48** | **GCA_032062785.1** | 1998 | 2011 | 1468 | 1421 | 205 | 210 | 38 |
| **49** | **GCA_032066125.1** | 2026 | 2039 | 1496 | 1449 | 233 | 238 | 66 |
| **50** | **GCA_032066145.1** | 2002 | 2015 | 1472 | 1425 | 209 | 214 | 41 |
| **51** | **GCA_032070585.1** | 1995 | 2009 | 1467 | 1422 | 206 | 211 | 38 |
| **52** | **GCA_032070965.1** | 2001 | 2014 | 1471 | 1424 | 208 | 213 | 41 |
| **53** | **GCA_032072835.1** | 3117 | 3127 | 209 | 97 | 1423 | 1428 | 1435 |
| **54** | **GCA_032077145.1** | 1999 | 2012 | 1470 | 1425 | 209 | 214 | 42 |
| **55** | **GCA_032128025.1** | 10848 | 10863 | 11102 | 11052 | 10297 | 10302 | 10307 |
| **56** | **GCA_032129715.1** | 2003 | 2017 | 1475 | 1430 | 214 | 219 | 46 |
| **57** | **GCA_032132495.1** | 2025 | 2038 | 1495 | 1447 | 232 | 237 | 65 |
| **58** | **GCA_032132835.1** | 2057 | 2070 | 1500 | 1453 | 264 | 269 | 97 |
| **59** | **GCA_032134135.1** | 3454 | 3468 | 553 | 512 | 1764 | 1769 | 1773 |
| **60** | **GCA_032134975.1** | 2014 | 2027 | 1484 | 1440 | 224 | 229 | 57 |
| **61** | **GCA_032137635.1** | 1999 | 2012 | 1469 | 1422 | 206 | 211 | 105 |
| **62** | **GCA_032153315.1** | 2002 | 2015 | 1472 | 1425 | 209 | 214 | 42 |
| **63** | **GCA_032155885.1** | 1999 | 2012 | 1469 | 1422 | 210 | 215 | 109 |
| **64** | **GCA_032411785.1** | 2004 | 2017 | 1475 | 1430 | 214 | 219 | 47 |
| **65** | **GCA_033106885.1** | 10265 | 10281 | 10502 | 10452 | 9714 | 9719 | 9724 |
| **66** | **GCA_033107445.1** | 10244 | 10258 | 10503 | 10454 | 9693 | 9698 | 9704 |
| **67** | **GCA_033108425.1** | 3539 | 3550 | 774 | 732 | 1929 | 1933 | 1944 |
| **68** | **GCA_033122545.1** | 2103 | 2116 | 1575 | 1528 | 312 | 317 | 187 |
| **69** | **GCA_900181095.1** | 2056 | 2071 | 1497 | 1462 | 268 | 273 | 249 |
| **70** | **GCA_900502575.1** | 1990 | 2005 | 1462 | 1415 | 199 | 204 | 30 |
| **71** | **GCA_900503265.1** | 151 | 167 | 3109 | 3097 | 1977 | 1982 | 1986 |
| **72** | **GCA_900504655.1** | 1394 | 1408 | 3951 | 3883 | 3176 | 3181 | 3184 |
| **73** | **GCA_900504955.1** | 1988 | 2003 | 1462 | 1415 | 199 | 204 | 96 |
| **74** | **GCA_900506745.1** | 106 | 121 | 3145 | 3099 | 1979 | 1984 | 1988 |
| **75** | **GCA_900512545.1** | 1996 | 2009 | 1466 | 1419 | 203 | 208 | 36 |
| **76** | **GCF_024495065.1** | 3121 | 3131 | 102 | 166 | 1424 | 1429 | 1437 |
| **77** | **GCF_024495515.1** | 3123 | 3133 | 103 | 167 | 1427 | 1432 | 1439 |
| **78** | **SAMEA113605448** | 3118 | 3128 | 217 | 101 | 1429 | 1434 | 1442 |
| **79** | **SAMEA113605746** | 2222 | 2235 | 1746 | 1702 | 499 | 503 | 373 |
| **80** | **SAMEA2052930** | 2000 | 2015 | 1471 | 1423 | 210 | 215 | 106 |
| **81** | **SAMEA2633723** | 10231 | 10244 | 10490 | 10440 | 9677 | 9682 | 9688 |
| **82** | **SAMEA3281566** | 3137 | 3146 | 229 | 185 | 1444 | 1449 | 1456 |
| **83** | **SAMEA5758680** | 1992 | 2005 | 1463 | 1416 | 200 | 205 | 99 |
| **84** | **SAMEA6155812** | 1446 | 1460 | 4003 | 3935 | 3225 | 3230 | 3236 |
| **85** | **SAMEA6155829** | 1446 | 1457 | 4000 | 3932 | 3222 | 3227 | 3236 |
| **86** | **SAMEA6155886** | 1446 | 1460 | 4003 | 3935 | 3225 | 3230 | 3236 |
| **87** | **SAMEA6156048** | 1446 | 1457 | 4000 | 3932 | 3222 | 3227 | 3236 |
| **88** | **SAMEA6375606** | 222 | 235 | 3177 | 3165 | 2039 | 2044 | 2056 |
| **89** | **SAMEA6635864** | 1446 | 1457 | 4000 | 3932 | 3222 | 3227 | 3236 |
| **90** | **SAMEA6654214** | 1444 | 1461 | 3997 | 3929 | 3223 | 3228 | 3234 |
| **91** | **SAMEA6654216** | 1446 | 1457 | 4000 | 3932 | 3225 | 3230 | 3236 |
| **92** | **SAMEA6654217** | 1470 | 1481 | 4024 | 3956 | 3247 | 3252 | 3258 |
| **93** | **SAMEA6654218** | 1454 | 1466 | 4009 | 3941 | 3234 | 3239 | 3244 |
| **94** | **SAMEA7472332** | 2040 | 2053 | 1513 | 1446 | 252 | 257 | 235 |
| **95** | **SAMEA7472348** | 3202 | 3214 | 303 | 191 | 1512 | 1517 | 1522 |
| **96** | **SAMN16197932** | 1 | 126 | 3170 | 3124 | 2004 | 2009 | 2015 |
| **97** | **SAMN16197933** | 3 | 128 | 3172 | 3126 | 2006 | 2011 | 2017 |
| **98** | **SAMN16197935** | 0 | 125 | 3169 | 3123 | 2003 | 2008 | 2014 |
| **99** | **SAMN17981712** | 3119 | 3129 | 209 | 115 | 1423 | 1428 | 1435 |

| **snp-dists 0.8.2** | | **15** | **16** | **17** | **18** | **19** | **20** | **21** |
| --- | --- | --- | --- | --- | --- | --- | --- | --- |
| **GCA_021926845.1** | **GCA_021928295.1** | **GCA_021928995.1** | **GCA_021929455.1** | **GCA_021933415.1** | **GCA_021956765.1** | **GCA_021957705.1** |
| **1** | **A1** | 1454 | 1440 | 1470 | 1463 | 10488 | 3244 | 3117 |
| **2** | **GCA_002186705.1** | 1442 | 1426 | 1457 | 1451 | 10470 | 3232 | 3105 |
| **3** | **GCA_002186945.1** | 1442 | 1426 | 1457 | 1451 | 10468 | 3232 | 3105 |
| **4** | **GCA_002187375.1** | 3226 | 3215 | 3239 | 3236 | 10857 | 1523 | 1417 |
| **5** | **GCA_002187715.1** | 1537 | 1521 | 1552 | 1546 | 10569 | 3327 | 3200 |
| **6** | **GCA_002188235.1** | 1527 | 1511 | 1542 | 1536 | 10560 | 3317 | 3190 |
| **7** | **GCA_003195295.1** | 1865 | 1849 | 1878 | 1874 | 10688 | 3643 | 3514 |
| **8** | **GCA_014788765.1** | 2011 | 1996 | 2021 | 2020 | 10258 | 283 | 87 |
| **9** | **GCA_015720195.1** | 2024 | 2009 | 2034 | 2033 | 10271 | 296 | 81 |
| **10** | **GCA_021441845.1** | 1482 | 1466 | 1497 | 1491 | 10518 | 3238 | 3145 |
| **11** | **GCA_021920105.1** | 1437 | 1419 | 1452 | 1440 | 10468 | 3226 | 3099 |
| **12** | **GCA_021920885.1** | 221 | 203 | 236 | 230 | 9705 | 2100 | 1979 |
| **13** | **GCA_021920985.1** | 226 | 208 | 241 | 235 | 9710 | 2105 | 1984 |
| **14** | **GCA_021925685.1** | 54 | 36 | 69 | 57 | 9717 | 2117 | 1989 |
| **15** | **GCA_021926845.1** | 0 | 34 | 66 | 55 | 9714 | 2114 | 1986 |
| **16** | **GCA_021928295.1** | 34 | 0 | 47 | 41 | 9697 | 2099 | 1972 |
| **17** | **GCA_021928995.1** | 66 | 47 | 0 | 68 | 9723 | 2123 | 1997 |
| **18** | **GCA_021929455.1** | 55 | 41 | 68 | 0 | 9725 | 2123 | 1995 |
| **19** | **GCA_021933415.1** | 9714 | 9697 | 9723 | 9725 | 0 | 10357 | 10234 |
| **20** | **GCA_021956765.1** | 2114 | 2099 | 2123 | 2123 | 10357 | 0 | 258 |
| **21** | **GCA_021957705.1** | 1986 | 1972 | 1997 | 1995 | 10234 | 258 | 0 |
| **22** | **GCA_022048705.1** | 1458 | 1442 | 1473 | 1467 | 10492 | 3247 | 3121 |
| **23** | **GCA_022061125.1** | 1988 | 1973 | 1998 | 1997 | 10216 | 238 | 45 |
| **24** | **GCA_022084535.1** | 1971 | 1956 | 1981 | 1980 | 10220 | 243 | 28 |
| **25** | **GCA_022176145.1** | 3230 | 3213 | 3240 | 3234 | 10863 | 1549 | 1419 |
| **26** | **GCA_022176185.1** | 3227 | 3213 | 3237 | 3237 | 10863 | 1546 | 1416 |
| **27** | **GCA_022176205.1** | 3232 | 3220 | 3244 | 3242 | 10868 | 1551 | 1422 |
| **28** | **GCA_022176585.1** | 3233 | 3219 | 3243 | 3243 | 10869 | 1552 | 1422 |
| **29** | **GCA_022176645.1** | 3230 | 3216 | 3240 | 3238 | 10866 | 1549 | 1419 |
| **30** | **GCA_022233245.1** | 1444 | 1428 | 1459 | 1453 | 10480 | 3234 | 3106 |
| **31** | **GCA_022233305.1** | 1467 | 1451 | 1482 | 1476 | 10499 | 3257 | 3129 |
| **32** | **GCA_022233405.1** | 9676 | 9662 | 9688 | 9687 | 174 | 10320 | 10199 |
| **33** | **GCA_022250515.1** | 195 | 177 | 210 | 204 | 9673 | 2080 | 1953 |
| **34** | **GCA_022270255.1** | 106 | 88 | 121 | 115 | 9703 | 2105 | 1977 |
| **35** | **GCA_022270275.1** | 149 | 133 | 166 | 158 | 9742 | 2148 | 2021 |
| **36** | **GCA_022270495.1** | 129 | 111 | 144 | 138 | 9726 | 2128 | 2001 |
| **37** | **GCA_022270575.1** | 109 | 91 | 124 | 112 | 9706 | 2105 | 1978 |
| **38** | **GCA_022270615.1** | 110 | 93 | 126 | 119 | 9707 | 2109 | 1981 |
| **39** | **GCA_022270695.1** | 127 | 111 | 144 | 136 | 9723 | 2126 | 1999 |
| **40** | **GCA_024392555.1** | 1997 | 1982 | 2007 | 2006 | 10246 | 269 | 54 |
| **41** | **GCA_024474865.1** | 1457 | 1441 | 1472 | 1466 | 10489 | 3247 | 3120 |
| **42** | **GCA_025101225.1** | 1450 | 1434 | 1465 | 1459 | 10485 | 3240 | 3113 |
| **43** | **GCA_026361275.1** | 1491 | 1477 | 1508 | 1500 | 10526 | 3281 | 3156 |
| **44** | **GCA_030786325.1** | 1496 | 1481 | 1512 | 1505 | 10525 | 3282 | 3154 |
| **45** | **GCA_030820975.1** | 1982 | 1969 | 1994 | 1991 | 10230 | 254 | 39 |
| **46** | **GCA_032044555.1** | 136 | 118 | 151 | 145 | 9703 | 2109 | 1981 |
| **47** | **GCA_032046295.1** | 63 | 47 | 80 | 66 | 9725 | 2122 | 1995 |
| **48** | **GCA_032062785.1** | 36 | 18 | 51 | 41 | 9700 | 2101 | 1973 |
| **49** | **GCA_032066125.1** | 64 | 46 | 79 | 73 | 9723 | 2129 | 2002 |
| **50** | **GCA_032066145.1** | 38 | 21 | 53 | 48 | 9704 | 2105 | 1977 |
| **51** | **GCA_032070585.1** | 36 | 19 | 52 | 39 | 9700 | 2097 | 1972 |
| **52** | **GCA_032070965.1** | 39 | 21 | 54 | 48 | 9702 | 2104 | 1977 |
| **53** | **GCA_032072835.1** | 1432 | 1416 | 1447 | 1441 | 10465 | 3220 | 3092 |
| **54** | **GCA_032077145.1** | 40 | 22 | 55 | 43 | 9700 | 2102 | 1974 |
| **55** | **GCA_032128025.1** | 10304 | 10289 | 10315 | 10315 | 684 | 10946 | 10825 |
| **56** | **GCA_032129715.1** | 44 | 27 | 60 | 47 | 9698 | 2106 | 1978 |
| **57** | **GCA_032132495.1** | 63 | 45 | 78 | 72 | 9727 | 2127 | 2001 |
| **58** | **GCA_032132835.1** | 95 | 77 | 110 | 104 | 9746 | 2160 | 2033 |
| **59** | **GCA_032134135.1** | 1771 | 1758 | 1789 | 1781 | 10777 | 3559 | 3432 |
| **60** | **GCA_032134975.1** | 55 | 35 | 68 | 56 | 9719 | 2117 | 1989 |
| **61** | **GCA_032137635.1** | 103 | 85 | 118 | 112 | 9701 | 2102 | 1975 |
| **62** | **GCA_032153315.1** | 40 | 22 | 55 | 49 | 9704 | 2105 | 1978 |
| **63** | **GCA_032155885.1** | 107 | 89 | 122 | 116 | 9704 | 2102 | 1974 |
| **64** | **GCA_032411785.1** | 45 | 27 | 59 | 48 | 9706 | 2107 | 1980 |
| **65** | **GCA_033106885.1** | 9721 | 9706 | 9732 | 9732 | 225 | 10365 | 10245 |
| **66** | **GCA_033107445.1** | 9701 | 9685 | 9709 | 9705 | 212 | 10343 | 10220 |
| **67** | **GCA_033108425.1** | 1939 | 1924 | 1955 | 1942 | 10582 | 3639 | 3516 |
| **68** | **GCA_033122545.1** | 185 | 167 | 200 | 194 | 9791 | 2206 | 2079 |
| **69** | **GCA_900181095.1** | 247 | 231 | 264 | 255 | 9739 | 2126 | 2032 |
| **70** | **GCA_900502575.1** | 28 | 12 | 45 | 37 | 9692 | 2093 | 1966 |
| **71** | **GCA_900503265.1** | 1983 | 1970 | 1995 | 1992 | 10228 | 191 | 128 |
| **72** | **GCA_900504655.1** | 3181 | 3169 | 3194 | 3190 | 10824 | 1499 | 1371 |
| **73** | **GCA_900504955.1** | 94 | 78 | 111 | 103 | 9688 | 2091 | 1964 |
| **74** | **GCA_900506745.1** | 1985 | 1972 | 1997 | 1994 | 10231 | 243 | 82 |
| **75** | **GCA_900512545.1** | 34 | 16 | 49 | 43 | 9698 | 2099 | 1971 |
| **76** | **GCF_024495065.1** | 1435 | 1417 | 1449 | 1438 | 10469 | 3224 | 3097 |
| **77** | **GCF_024495515.1** | 1436 | 1420 | 1450 | 1445 | 10472 | 3226 | 3099 |
| **78** | **SAMEA113605448** | 1439 | 1422 | 1455 | 1443 | 10449 | 3217 | 3094 |
| **79** | **SAMEA113605746** | 371 | 354 | 387 | 375 | 9763 | 2322 | 2197 |
| **80** | **SAMEA2052930** | 104 | 89 | 121 | 113 | 9703 | 2103 | 1976 |
| **81** | **SAMEA2633723** | 9685 | 9668 | 9694 | 9696 | 182 | 10329 | 10207 |
| **82** | **SAMEA3281566** | 1453 | 1437 | 1468 | 1462 | 10484 | 3240 | 3112 |
| **83** | **SAMEA5758680** | 97 | 79 | 112 | 106 | 9688 | 2096 | 1967 |
| **84** | **SAMEA6155812** | 3229 | 3218 | 3242 | 3242 | 10870 | 1529 | 1423 |
| **85** | **SAMEA6155829** | 3229 | 3215 | 3239 | 3242 | 10870 | 1529 | 1421 |
| **86** | **SAMEA6155886** | 3229 | 3218 | 3242 | 3242 | 10870 | 1529 | 1423 |
| **87** | **SAMEA6156048** | 3229 | 3215 | 3239 | 3242 | 10870 | 1529 | 1421 |
| **88** | **SAMEA6375606** | 2053 | 2038 | 2062 | 2062 | 10299 | 69 | 197 |
| **89** | **SAMEA6635864** | 3229 | 3215 | 3239 | 3242 | 10870 | 1529 | 1421 |
| **90** | **SAMEA6654214** | 3229 | 3216 | 3240 | 3240 | 10854 | 1549 | 1419 |
| **91** | **SAMEA6654216** | 3232 | 3218 | 3242 | 3242 | 10868 | 1551 | 1421 |
| **92** | **SAMEA6654217** | 3250 | 3240 | 3260 | 3262 | 10882 | 1575 | 1445 |
| **93** | **SAMEA6654218** | 3240 | 3227 | 3251 | 3250 | 10875 | 1559 | 1431 |
| **94** | **SAMEA7472332** | 233 | 215 | 248 | 235 | 9745 | 2143 | 2016 |
| **95** | **SAMEA7472348** | 1519 | 1505 | 1538 | 1523 | 10520 | 3305 | 3179 |
| **96** | **SAMN16197932** | 2012 | 1997 | 2022 | 2021 | 10259 | 284 | 88 |
| **97** | **SAMN16197933** | 2014 | 1999 | 2024 | 2023 | 10258 | 286 | 90 |
| **98** | **SAMN16197935** | 2011 | 1996 | 2021 | 2020 | 10258 | 283 | 87 |
| **99** | **SAMN17981712** | 1432 | 1416 | 1447 | 1441 | 10462 | 3218 | 3094 |

| **snp-dists 0.8.2** | | **22** | **23** | **24** | **25** | **26** | **27** | **28** |
| --- | --- | --- | --- | --- | --- | --- | --- | --- |
| **GCA_022048705.1** | **GCA_022061125.1** | **GCA_022084535.1** | **GCA_022176145.1** | **GCA_022176185.1** | **GCA_022176205.1** | **GCA_022176585.1** |
| **1** | **A1** | 208 | 3120 | 3103 | 3968 | 3966 | 3973 | 3972 |
| **2** | **GCA_002186705.1** | 108 | 3106 | 3089 | 3933 | 3931 | 3938 | 3937 |
| **3** | **GCA_002186945.1** | 108 | 3106 | 3089 | 3935 | 3933 | 3940 | 3939 |
| **4** | **GCA_002187375.1** | 3973 | 1396 | 1403 | 54 | 51 | 57 | 57 |
| **5** | **GCA_002187715.1** | 195 | 3201 | 3184 | 4028 | 4026 | 4033 | 4032 |
| **6** | **GCA_002188235.1** | 185 | 3191 | 3174 | 4018 | 4016 | 4023 | 4022 |
| **7** | **GCA_003195295.1** | 608 | 3511 | 3501 | 4293 | 4291 | 4296 | 4297 |
| **8** | **GCA_014788765.1** | 3145 | 89 | 72 | 1444 | 1441 | 1446 | 1447 |
| **9** | **GCA_015720195.1** | 3155 | 82 | 65 | 1455 | 1452 | 1459 | 1458 |
| **10** | **GCA_021441845.1** | 235 | 3146 | 3129 | 3997 | 3995 | 4002 | 4001 |
| **11** | **GCA_021920105.1** | 145 | 3100 | 3083 | 3930 | 3927 | 3934 | 3933 |
| **12** | **GCA_021920885.1** | 1449 | 1980 | 1963 | 3220 | 3220 | 3227 | 3226 |
| **13** | **GCA_021920985.1** | 1454 | 1985 | 1968 | 3225 | 3225 | 3232 | 3231 |
| **14** | **GCA_021925685.1** | 1461 | 1991 | 1974 | 3233 | 3231 | 3236 | 3237 |
| **15** | **GCA_021926845.1** | 1458 | 1988 | 1971 | 3230 | 3227 | 3232 | 3233 |
| **16** | **GCA_021928295.1** | 1442 | 1973 | 1956 | 3213 | 3213 | 3220 | 3219 |
| **17** | **GCA_021928995.1** | 1473 | 1998 | 1981 | 3240 | 3237 | 3244 | 3243 |
| **18** | **GCA_021929455.1** | 1467 | 1997 | 1980 | 3234 | 3237 | 3242 | 3243 |
| **19** | **GCA_021933415.1** | 10492 | 10216 | 10220 | 10863 | 10863 | 10868 | 10869 |
| **20** | **GCA_021956765.1** | 3247 | 238 | 243 | 1549 | 1546 | 1551 | 1552 |
| **21** | **GCA_021957705.1** | 3121 | 45 | 28 | 1419 | 1416 | 1422 | 1422 |
| **22** | **GCA_022048705.1** | 0 | 3122 | 3105 | 3973 | 3971 | 3978 | 3977 |
| **23** | **GCA_022061125.1** | 3122 | 0 | 27 | 1415 | 1412 | 1419 | 1418 |
| **24** | **GCA_022084535.1** | 3105 | 27 | 0 | 1404 | 1401 | 1408 | 1407 |
| **25** | **GCA_022176145.1** | 3973 | 1415 | 1404 | 0 | 7 | 4 | 5 |
| **26** | **GCA_022176185.1** | 3971 | 1412 | 1401 | 7 | 0 | 9 | 10 |
| **27** | **GCA_022176205.1** | 3978 | 1419 | 1408 | 4 | 9 | 0 | 5 |
| **28** | **GCA_022176585.1** | 3977 | 1418 | 1407 | 5 | 10 | 5 | 0 |
| **29** | **GCA_022176645.1** | 3974 | 1415 | 1404 | 2 | 7 | 4 | 5 |
| **30** | **GCA_022233245.1** | 196 | 3108 | 3091 | 3959 | 3957 | 3962 | 3963 |
| **31** | **GCA_022233305.1** | 219 | 3127 | 3114 | 3978 | 3976 | 3981 | 3982 |
| **32** | **GCA_022233405.1** | 10455 | 10182 | 10186 | 10825 | 10825 | 10833 | 10831 |
| **33** | **GCA_022250515.1** | 1423 | 1954 | 1937 | 3194 | 3194 | 3201 | 3200 |
| **34** | **GCA_022270255.1** | 1448 | 1979 | 1962 | 3219 | 3219 | 3224 | 3225 |
| **35** | **GCA_022270275.1** | 1493 | 2024 | 2007 | 3262 | 3262 | 3269 | 3268 |
| **36** | **GCA_022270495.1** | 1471 | 2002 | 1985 | 3242 | 3242 | 3249 | 3248 |
| **37** | **GCA_022270575.1** | 1449 | 1979 | 1962 | 3222 | 3219 | 3226 | 3225 |
| **38** | **GCA_022270615.1** | 1453 | 1984 | 1967 | 3223 | 3223 | 3229 | 3229 |
| **39** | **GCA_022270695.1** | 1471 | 2002 | 1985 | 3240 | 3240 | 3247 | 3246 |
| **40** | **GCA_024392555.1** | 3131 | 55 | 38 | 1430 | 1427 | 1434 | 1433 |
| **41** | **GCA_024474865.1** | 209 | 3121 | 3104 | 3972 | 3970 | 3977 | 3976 |
| **42** | **GCA_025101225.1** | 202 | 3110 | 3097 | 3961 | 3959 | 3966 | 3965 |
| **43** | **GCA_026361275.1** | 151 | 3157 | 3140 | 3984 | 3982 | 3991 | 3988 |
| **44** | **GCA_030786325.1** | 205 | 3152 | 3140 | 3980 | 3978 | 3984 | 3984 |
| **45** | **GCA_030820975.1** | 3118 | 42 | 25 | 1415 | 1412 | 1419 | 1418 |
| **46** | **GCA_032044555.1** | 1451 | 1983 | 1966 | 3221 | 3221 | 3226 | 3227 |
| **47** | **GCA_032046295.1** | 1471 | 1998 | 1981 | 3239 | 3236 | 3243 | 3242 |
| **48** | **GCA_032062785.1** | 1444 | 1975 | 1958 | 3215 | 3215 | 3220 | 3221 |
| **49** | **GCA_032066125.1** | 1471 | 2003 | 1986 | 3243 | 3243 | 3250 | 3249 |
| **50** | **GCA_032066145.1** | 1448 | 1979 | 1962 | 3216 | 3217 | 3222 | 3223 |
| **51** | **GCA_032070585.1** | 1443 | 1972 | 1956 | 3215 | 3212 | 3220 | 3218 |
| **52** | **GCA_032070965.1** | 1447 | 1978 | 1961 | 3218 | 3218 | 3225 | 3224 |
| **53** | **GCA_032072835.1** | 140 | 3094 | 3077 | 3923 | 3921 | 3926 | 3927 |
| **54** | **GCA_032077145.1** | 1446 | 1976 | 1959 | 3219 | 3216 | 3221 | 3222 |
| **55** | **GCA_032128025.1** | 11075 | 10808 | 10812 | 11447 | 11448 | 11454 | 11453 |
| **56** | **GCA_032129715.1** | 1451 | 1981 | 1964 | 3223 | 3220 | 3226 | 3226 |
| **57** | **GCA_032132495.1** | 1471 | 2002 | 1985 | 3242 | 3242 | 3247 | 3248 |
| **58** | **GCA_032132835.1** | 1476 | 2034 | 2017 | 3274 | 3274 | 3281 | 3280 |
| **59** | **GCA_032134135.1** | 532 | 3434 | 3418 | 4281 | 4279 | 4286 | 4285 |
| **60** | **GCA_032134975.1** | 1461 | 1991 | 1974 | 3234 | 3231 | 3236 | 3237 |
| **61** | **GCA_032137635.1** | 1445 | 1976 | 1959 | 3216 | 3216 | 3223 | 3222 |
| **62** | **GCA_032153315.1** | 1448 | 1979 | 1962 | 3219 | 3219 | 3226 | 3225 |
| **63** | **GCA_032155885.1** | 1445 | 1976 | 1959 | 3216 | 3216 | 3221 | 3222 |
| **64** | **GCA_032411785.1** | 1451 | 1981 | 1964 | 3224 | 3221 | 3228 | 3227 |
| **65** | **GCA_033106885.1** | 10476 | 10225 | 10230 | 10872 | 10872 | 10881 | 10878 |
| **66** | **GCA_033107445.1** | 10477 | 10202 | 10207 | 10850 | 10848 | 10854 | 10854 |
| **67** | **GCA_033108425.1** | 753 | 3516 | 3501 | 4334 | 4332 | 4339 | 4338 |
| **68** | **GCA_033122545.1** | 1551 | 2080 | 2063 | 3320 | 3320 | 3327 | 3326 |
| **69** | **GCA_900181095.1** | 1507 | 2035 | 2018 | 3252 | 3252 | 3259 | 3258 |
| **70** | **GCA_900502575.1** | 1438 | 1969 | 1952 | 3207 | 3207 | 3214 | 3213 |
| **71** | **GCA_900503265.1** | 3118 | 131 | 114 | 1418 | 1415 | 1422 | 1421 |
| **72** | **GCA_900504655.1** | 3927 | 1372 | 1357 | 86 | 83 | 89 | 89 |
| **73** | **GCA_900504955.1** | 1438 | 1967 | 1950 | 3205 | 3205 | 3212 | 3211 |
| **74** | **GCA_900506745.1** | 3121 | 71 | 68 | 1418 | 1415 | 1422 | 1421 |
| **75** | **GCA_900512545.1** | 1442 | 1973 | 1956 | 3213 | 3213 | 3218 | 3219 |
| **76** | **GCF_024495065.1** | 187 | 3098 | 3081 | 3950 | 3947 | 3954 | 3953 |
| **77** | **GCF_024495515.1** | 188 | 3100 | 3083 | 3951 | 3949 | 3956 | 3955 |
| **78** | **SAMEA113605448** | 148 | 3095 | 3078 | 3924 | 3921 | 3928 | 3927 |
| **79** | **SAMEA113605746** | 1724 | 2199 | 2182 | 3422 | 3420 | 3425 | 3425 |
| **80** | **SAMEA2052930** | 1447 | 1979 | 1962 | 3216 | 3217 | 3224 | 3223 |
| **81** | **SAMEA2633723** | 10464 | 10189 | 10193 | 10837 | 10837 | 10842 | 10843 |
| **82** | **SAMEA3281566** | 206 | 3114 | 3097 | 3965 | 3963 | 3968 | 3969 |
| **83** | **SAMEA5758680** | 1439 | 1969 | 1952 | 3210 | 3210 | 3215 | 3216 |
| **84** | **SAMEA6155812** | 3979 | 1398 | 1409 | 54 | 51 | 57 | 57 |
| **85** | **SAMEA6155829** | 3976 | 1395 | 1406 | 54 | 51 | 56 | 57 |
| **86** | **SAMEA6155886** | 3979 | 1398 | 1409 | 54 | 51 | 57 | 57 |
| **87** | **SAMEA6156048** | 3976 | 1395 | 1406 | 54 | 51 | 56 | 57 |
| **88** | **SAMEA6375606** | 3186 | 177 | 182 | 1488 | 1485 | 1490 | 1491 |
| **89** | **SAMEA6635864** | 3976 | 1395 | 1406 | 54 | 51 | 56 | 57 |
| **90** | **SAMEA6654214** | 3974 | 1415 | 1404 | 2 | 7 | 4 | 5 |
| **91** | **SAMEA6654216** | 3976 | 1417 | 1406 | 4 | 7 | 6 | 7 |
| **92** | **SAMEA6654217** | 4000 | 1441 | 1430 | 25 | 30 | 25 | 26 |
| **93** | **SAMEA6654218** | 3985 | 1426 | 1415 | 12 | 17 | 13 | 13 |
| **94** | **SAMEA7472332** | 1489 | 2017 | 2000 | 3238 | 3235 | 3242 | 3241 |
| **95** | **SAMEA7472348** | 185 | 3180 | 3165 | 4007 | 4004 | 4011 | 4009 |
| **96** | **SAMN16197932** | 3146 | 90 | 73 | 1445 | 1442 | 1447 | 1448 |
| **97** | **SAMN16197933** | 3148 | 92 | 75 | 1447 | 1444 | 1449 | 1450 |
| **98** | **SAMN16197935** | 3145 | 89 | 72 | 1444 | 1441 | 1446 | 1447 |
| **99** | **SAMN17981712** | 110 | 3096 | 3079 | 3946 | 3944 | 3949 | 3950 |

| **snp-dists 0.8.2** | | **29** | **30** | **31** | **32** | **33** | **34** | **35** |
| --- | --- | --- | --- | --- | --- | --- | --- | --- |
| **GCA_022176645.1** | **GCA_022233245.1** | **GCA_022233305.1** | **GCA_022233405.1** | **GCA_022250515.1** | **GCA_022270255.1** | **GCA_022270275.1** |
| **1** | **A1** | 3969 | 190 | 213 | 10449 | 1421 | 1444 | 1487 |
| **2** | **GCA_002186705.1** | 3934 | 180 | 203 | 10431 | 1407 | 1432 | 1477 |
| **3** | **GCA_002186945.1** | 3936 | 180 | 203 | 10431 | 1407 | 1432 | 1477 |
| **4** | **GCA_002187375.1** | 54 | 3956 | 3979 | 10822 | 3196 | 3218 | 3262 |
| **5** | **GCA_002187715.1** | 4029 | 275 | 298 | 10532 | 1502 | 1527 | 1572 |
| **6** | **GCA_002188235.1** | 4019 | 265 | 288 | 10524 | 1492 | 1517 | 1562 |
| **7** | **GCA_003195295.1** | 4294 | 638 | 657 | 10650 | 1828 | 1856 | 1899 |
| **8** | **GCA_014788765.1** | 1444 | 3131 | 3154 | 10221 | 1977 | 2002 | 2045 |
| **9** | **GCA_015720195.1** | 1455 | 3141 | 3164 | 10237 | 1990 | 2015 | 2060 |
| **10** | **GCA_021441845.1** | 3998 | 219 | 242 | 10481 | 1447 | 1472 | 1517 |
| **11** | **GCA_021920105.1** | 3930 | 175 | 198 | 10431 | 1400 | 1425 | 1470 |
| **12** | **GCA_021920885.1** | 3223 | 1435 | 1458 | 9670 | 184 | 209 | 254 |
| **13** | **GCA_021920985.1** | 3228 | 1440 | 1463 | 9675 | 189 | 214 | 259 |
| **14** | **GCA_021925685.1** | 3234 | 1447 | 1470 | 9677 | 197 | 108 | 151 |
| **15** | **GCA_021926845.1** | 3230 | 1444 | 1467 | 9676 | 195 | 106 | 149 |
| **16** | **GCA_021928295.1** | 3216 | 1428 | 1451 | 9662 | 177 | 88 | 133 |
| **17** | **GCA_021928995.1** | 3240 | 1459 | 1482 | 9688 | 210 | 121 | 166 |
| **18** | **GCA_021929455.1** | 3238 | 1453 | 1476 | 9687 | 204 | 115 | 158 |
| **19** | **GCA_021933415.1** | 10866 | 10480 | 10499 | 174 | 9673 | 9703 | 9742 |
| **20** | **GCA_021956765.1** | 1549 | 3234 | 3257 | 10320 | 2080 | 2105 | 2148 |
| **21** | **GCA_021957705.1** | 1419 | 3106 | 3129 | 10199 | 1953 | 1977 | 2021 |
| **22** | **GCA_022048705.1** | 3974 | 196 | 219 | 10455 | 1423 | 1448 | 1493 |
| **23** | **GCA_022061125.1** | 1415 | 3108 | 3127 | 10182 | 1954 | 1979 | 2024 |
| **24** | **GCA_022084535.1** | 1404 | 3091 | 3114 | 10186 | 1937 | 1962 | 2007 |
| **25** | **GCA_022176145.1** | 2 | 3959 | 3978 | 10825 | 3194 | 3219 | 3262 |
| **26** | **GCA_022176185.1** | 7 | 3957 | 3976 | 10825 | 3194 | 3219 | 3262 |
| **27** | **GCA_022176205.1** | 4 | 3962 | 3981 | 10833 | 3201 | 3224 | 3269 |
| **28** | **GCA_022176585.1** | 5 | 3963 | 3982 | 10831 | 3200 | 3225 | 3268 |
| **29** | **GCA_022176645.1** | 0 | 3960 | 3979 | 10828 | 3197 | 3222 | 3265 |
| **30** | **GCA_022233245.1** | 3960 | 0 | 81 | 10440 | 1409 | 1434 | 1477 |
| **31** | **GCA_022233305.1** | 3979 | 81 | 0 | 10459 | 1432 | 1457 | 1500 |
| **32** | **GCA_022233405.1** | 10828 | 10440 | 10459 | 0 | 9638 | 9665 | 9705 |
| **33** | **GCA_022250515.1** | 3197 | 1409 | 1432 | 9638 | 0 | 183 | 228 |
| **34** | **GCA_022270255.1** | 3222 | 1434 | 1457 | 9665 | 183 | 0 | 45 |
| **35** | **GCA_022270275.1** | 3265 | 1477 | 1500 | 9705 | 228 | 45 | 0 |
| **36** | **GCA_022270495.1** | 3245 | 1457 | 1480 | 9691 | 206 | 25 | 70 |
| **37** | **GCA_022270575.1** | 3222 | 1435 | 1458 | 9671 | 186 | 27 | 72 |
| **38** | **GCA_022270615.1** | 3226 | 1438 | 1461 | 9671 | 188 | 28 | 72 |
| **39** | **GCA_022270695.1** | 3243 | 1455 | 1478 | 9686 | 206 | 23 | 66 |
| **40** | **GCA_024392555.1** | 1430 | 3117 | 3140 | 10212 | 1963 | 1988 | 2033 |
| **41** | **GCA_024474865.1** | 3973 | 193 | 216 | 10453 | 1422 | 1447 | 1492 |
| **42** | **GCA_025101225.1** | 3962 | 44 | 83 | 10448 | 1415 | 1440 | 1485 |
| **43** | **GCA_026361275.1** | 3985 | 229 | 252 | 10487 | 1458 | 1481 | 1526 |
| **44** | **GCA_030786325.1** | 3981 | 234 | 253 | 10487 | 1462 | 1486 | 1530 |
| **45** | **GCA_030820975.1** | 1415 | 3102 | 3125 | 10194 | 1950 | 1973 | 2016 |
| **46** | **GCA_032044555.1** | 3224 | 1438 | 1461 | 9665 | 187 | 124 | 167 |
| **47** | **GCA_032046295.1** | 3239 | 1455 | 1478 | 9688 | 208 | 117 | 160 |
| **48** | **GCA_032062785.1** | 3218 | 1430 | 1453 | 9662 | 179 | 90 | 133 |
| **49** | **GCA_032066125.1** | 3246 | 1458 | 1481 | 9688 | 207 | 118 | 163 |
| **50** | **GCA_032066145.1** | 3220 | 1434 | 1457 | 9665 | 183 | 93 | 136 |
| **51** | **GCA_032070585.1** | 3215 | 1428 | 1451 | 9666 | 180 | 90 | 136 |
| **52** | **GCA_032070965.1** | 3221 | 1433 | 1456 | 9667 | 182 | 93 | 138 |
| **53** | **GCA_032072835.1** | 3924 | 170 | 193 | 10425 | 1397 | 1422 | 1465 |
| **54** | **GCA_032077145.1** | 3219 | 1432 | 1455 | 9662 | 183 | 94 | 137 |
| **55** | **GCA_032128025.1** | 11450 | 11062 | 11080 | 776 | 10263 | 10293 | 10332 |
| **56** | **GCA_032129715.1** | 3223 | 1436 | 1459 | 9662 | 188 | 98 | 142 |
| **57** | **GCA_032132495.1** | 3245 | 1457 | 1480 | 9688 | 206 | 117 | 160 |
| **58** | **GCA_032132835.1** | 3277 | 1462 | 1485 | 9711 | 238 | 149 | 194 |
| **59** | **GCA_032134135.1** | 4282 | 514 | 537 | 10737 | 1739 | 1762 | 1805 |
| **60** | **GCA_032134975.1** | 3234 | 1447 | 1470 | 9681 | 198 | 109 | 152 |
| **61** | **GCA_032137635.1** | 3219 | 1431 | 1454 | 9666 | 180 | 81 | 126 |
| **62** | **GCA_032153315.1** | 3222 | 1434 | 1457 | 9669 | 183 | 94 | 139 |
| **63** | **GCA_032155885.1** | 3219 | 1431 | 1454 | 9666 | 184 | 85 | 128 |
| **64** | **GCA_032411785.1** | 3224 | 1437 | 1460 | 9671 | 188 | 99 | 144 |
| **65** | **GCA_033106885.1** | 10875 | 10461 | 10481 | 152 | 9682 | 9710 | 9753 |
| **66** | **GCA_033107445.1** | 10851 | 10464 | 10483 | 44 | 9661 | 9690 | 9730 |
| **67** | **GCA_033108425.1** | 4334 | 560 | 641 | 10544 | 1907 | 1929 | 1973 |
| **68** | **GCA_033122545.1** | 3323 | 1537 | 1560 | 9755 | 285 | 197 | 242 |
| **69** | **GCA_900181095.1** | 3255 | 1491 | 1514 | 9702 | 242 | 235 | 278 |
| **70** | **GCA_900502575.1** | 3210 | 1422 | 1445 | 9655 | 173 | 82 | 125 |
| **71** | **GCA_900503265.1** | 1418 | 3103 | 3126 | 10192 | 1951 | 1974 | 2017 |
| **72** | **GCA_900504655.1** | 86 | 3910 | 3933 | 10789 | 3150 | 3172 | 3216 |
| **73** | **GCA_900504955.1** | 3208 | 1422 | 1445 | 9651 | 173 | 72 | 115 |
| **74** | **GCA_900506745.1** | 1418 | 3105 | 3128 | 10195 | 1953 | 1976 | 2019 |
| **75** | **GCA_900512545.1** | 3216 | 1428 | 1451 | 9660 | 177 | 88 | 131 |
| **76** | **GCF_024495065.1** | 3950 | 171 | 194 | 10432 | 1398 | 1423 | 1468 |
| **77** | **GCF_024495515.1** | 3952 | 172 | 195 | 10435 | 1401 | 1426 | 1471 |
| **78** | **SAMEA113605448** | 3924 | 178 | 201 | 10412 | 1403 | 1428 | 1473 |
| **79** | **SAMEA113605746** | 3423 | 1708 | 1732 | 9731 | 471 | 384 | 427 |
| **80** | **SAMEA2052930** | 3220 | 1431 | 1454 | 9666 | 184 | 83 | 126 |
| **81** | **SAMEA2633723** | 10840 | 10452 | 10471 | 104 | 9645 | 9674 | 9713 |
| **82** | **SAMEA3281566** | 3966 | 120 | 143 | 10444 | 1418 | 1443 | 1486 |
| **83** | **SAMEA5758680** | 3213 | 1425 | 1448 | 9650 | 174 | 75 | 118 |
| **84** | **SAMEA6155812** | 54 | 3962 | 3981 | 10835 | 3202 | 3224 | 3265 |
| **85** | **SAMEA6155829** | 54 | 3962 | 3981 | 10833 | 3199 | 3224 | 3264 |
| **86** | **SAMEA6155886** | 54 | 3962 | 3981 | 10835 | 3202 | 3224 | 3265 |
| **87** | **SAMEA6156048** | 54 | 3962 | 3981 | 10833 | 3199 | 3224 | 3264 |
| **88** | **SAMEA6375606** | 1488 | 3173 | 3196 | 10262 | 2019 | 2044 | 2087 |
| **89** | **SAMEA6635864** | 54 | 3962 | 3981 | 10833 | 3199 | 3224 | 3264 |
| **90** | **SAMEA6654214** | 2 | 3960 | 3979 | 10816 | 3197 | 3221 | 3264 |
| **91** | **SAMEA6654216** | 4 | 3962 | 3981 | 10830 | 3199 | 3224 | 3267 |
| **92** | **SAMEA6654217** | 23 | 3986 | 4005 | 10844 | 3221 | 3246 | 3289 |
| **93** | **SAMEA6654218** | 12 | 3970 | 3989 | 10841 | 3208 | 3232 | 3278 |
| **94** | **SAMEA7472332** | 3238 | 1475 | 1498 | 9710 | 226 | 221 | 266 |
| **95** | **SAMEA7472348** | 4007 | 262 | 285 | 10480 | 1486 | 1506 | 1550 |
| **96** | **SAMN16197932** | 1445 | 3132 | 3155 | 10222 | 1978 | 2003 | 2046 |
| **97** | **SAMN16197933** | 1447 | 3134 | 3157 | 10221 | 1980 | 2005 | 2048 |
| **98** | **SAMN16197935** | 1444 | 3131 | 3154 | 10221 | 1977 | 2002 | 2045 |
| **99** | **SAMN17981712** | 3947 | 170 | 193 | 10421 | 1397 | 1422 | 1465 |

| **snp-dists 0.8.2** | | **36** | | **37** | | **38** | | **39** | | **40** | | **41** | | **42** | |
| --- | --- | --- | --- | --- | --- | --- | --- | --- | --- | --- | --- | --- | --- | --- | --- |
| **GCA_022270495.1** | | **GCA_022270575.1** | | **GCA_022270615.1** | | **GCA_022270695.1** | | **GCA_024392555.1** | | **GCA_024474865.1** | | **GCA_025101225.1** | |
| **1** | **A1** | 1469 | | 1447 | | 1449 | | 1465 | | 3129 | | 205 | | 198 | |
| **2** | **GCA_002186705.1** | 1455 | | 1433 | | 1437 | | 1455 | | 3115 | | 193 | | 186 | |
| **3** | **GCA_002186945.1** | 1455 | | 1433 | | 1437 | | 1455 | | 3115 | | 193 | | 186 | |
| **4** | **GCA_002187375.1** | 3244 | | 3221 | | 3224 | | 3240 | | 1429 | | 3972 | | 3965 | |
| **5** | **GCA_002187715.1** | 1550 | | 1528 | | 1532 | | 1550 | | 3210 | | 287 | | 281 | |
| **6** | **GCA_002188235.1** | 1540 | | 1518 | | 1522 | | 1540 | | 3200 | | 278 | | 271 | |
| **7** | **GCA_003195295.1** | 1874 | | 1857 | | 1860 | | 1875 | | 3527 | | 651 | | 640 | |
| **8** | **GCA_014788765.1** | 2025 | | 2002 | | 2006 | | 2023 | | 98 | | 3144 | | 3137 | |
| **9** | **GCA_015720195.1** | 2038 | | 2015 | | 2020 | | 2038 | | 91 | | 3154 | | 3147 | |
| **10** | **GCA_021441845.1** | 1495 | | 1473 | | 1477 | | 1495 | | 3155 | | 232 | | 225 | |
| **11** | **GCA_021920105.1** | 1448 | | 1428 | | 1430 | | 1448 | | 3109 | | 188 | | 181 | |
| **12** | **GCA_021920885.1** | 232 | | 212 | | 214 | | 232 | | 1989 | | 1448 | | 1441 | |
| **13** | **GCA_021920985.1** | 237 | | 217 | | 219 | | 237 | | 1994 | | 1453 | | 1446 | |
| **14** | **GCA_021925685.1** | 131 | | 111 | | 112 | | 129 | | 2000 | | 1460 | | 1453 | |
| **15** | **GCA_021926845.1** | 129 | | 109 | | 110 | | 127 | | 1997 | | 1457 | | 1450 | |
| **16** | **GCA_021928295.1** | 111 | | 91 | | 93 | | 111 | | 1982 | | 1441 | | 1434 | |
| **17** | **GCA_021928995.1** | 144 | | 124 | | 126 | | 144 | | 2007 | | 1472 | | 1465 | |
| **18** | **GCA_021929455.1** | 138 | | 112 | | 119 | | 136 | | 2006 | | 1466 | | 1459 | |
| **19** | **GCA_021933415.1** | 9726 | | 9706 | | 9707 | | 9723 | | 10246 | | 10489 | | 10485 | |
| **20** | **GCA_021956765.1** | 2128 | | 2105 | | 2109 | | 2126 | | 269 | | 3247 | | 3240 | |
| **21** | **GCA_021957705.1** | 2001 | | 1978 | | 1981 | | 1999 | | 54 | | 3120 | | 3113 | |
| **22** | **GCA_022048705.1** | 1471 | | 1449 | | 1453 | | 1471 | | 3131 | | 209 | | 202 | |
| **23** | **GCA_022061125.1** | 2002 | | 1979 | | 1984 | | 2002 | | 55 | | 3121 | | 3110 | |
| **24** | **GCA_022084535.1** | 1985 | | 1962 | | 1967 | | 1985 | | 38 | | 3104 | | 3097 | |
| **25** | **GCA_022176145.1** | 3242 | | 3222 | | 3223 | | 3240 | | 1430 | | 3972 | | 3961 | |
| **26** | **GCA_022176185.1** | 3242 | | 3219 | | 3223 | | 3240 | | 1427 | | 3970 | | 3959 | |
| **27** | **GCA_022176205.1** | 3249 | | 3226 | | 3229 | | 3247 | | 1434 | | 3977 | | 3966 | |
| **28** | **GCA_022176585.1** | 3248 | | 3225 | | 3229 | | 3246 | | 1433 | | 3976 | | 3965 | |
| **29** | **GCA_022176645.1** | 3245 | | 3222 | | 3226 | | 3243 | | 1430 | | 3973 | | 3962 | |
| **30** | **GCA_022233245.1** | 1457 | | 1435 | | 1438 | | 1455 | | 3117 | | 193 | | 44 | |
| **31** | **GCA_022233305.1** | 1480 | | 1458 | | 1461 | | 1478 | | 3140 | | 216 | | 83 | |
| **32** | **GCA_022233405.1** | 9691 | | 9671 | | 9671 | | 9686 | | 10212 | | 10453 | | 10448 | |
| **33** | **GCA_022250515.1** | 206 | | 186 | | 188 | | 206 | | 1963 | | 1422 | | 1415 | |
| **34** | **GCA_022270255.1** | 25 | | 27 | | 28 | | 23 | | 1988 | | 1447 | | 1440 | |
| **35** | **GCA_022270275.1** | 70 | | 72 | | 72 | | 66 | | 2033 | | 1492 | | 1485 | |
| **36** | **GCA_022270495.1** | 0 | | 50 | | 52 | | 48 | | 2011 | | 1470 | | 1463 | |
| **37** | **GCA_022270575.1** | 50 | | 0 | | 4 | | 50 | | 1988 | | 1448 | | 1441 | |
| **38** | **GCA_022270615.1** | 52 | | 4 | | 0 | | 50 | | 1993 | | 1452 | | 1445 | |
| **39** | **GCA_022270695.1** | 48 | | 50 | | 50 | | 0 | | 2011 | | 1470 | | 1463 | |
| **40** | **GCA_024392555.1** | 2011 | | 1988 | | 1993 | | 2011 | | 0 | | 3130 | | 3123 | |
| **41** | **GCA_024474865.1** | 1470 | | 1448 | | 1452 | | 1470 | | 3130 | | 0 | | 199 | |
| **42** | **GCA_025101225.1** | 1463 | | 1441 | | 1445 | | 1463 | | 3123 | | 199 | | 0 | |
| **43** | **GCA_026361275.1** | 1506 | | 1484 | | 1488 | | 1503 | | 3166 | | 244 | | 237 | |
| **44** | **GCA_030786325.1** | 1510 | | 1488 | | 1490 | | 1508 | | 3166 | | 248 | | 237 | |
| **45** | **GCA_030820975.1** | 1998 | | 1975 | | 1978 | | 1994 | | 51 | | 3117 | | 3110 | |
| **46** | **GCA_032044555.1** | 147 | | 127 | | 128 | | 145 | | 1992 | | 1451 | | 1444 | |
| **47** | **GCA_032046295.1** | 142 | | 122 | | 122 | | 138 | | 2007 | | 1470 | | 1463 | |
| **48** | **GCA_032062785.1** | 113 | | 93 | | 94 | | 111 | | 1984 | | 1443 | | 1436 | |
| **49** | **GCA_032066125.1** | 141 | | 121 | | 123 | | 141 | | 2012 | | 1471 | | 1464 | |
| **50** | **GCA_032066145.1** | 116 | | 96 | | 97 | | 114 | | 1988 | | 1447 | | 1440 | |
| **51** | **GCA_032070585.1** | 114 | | 94 | | 96 | | 114 | | 1982 | | 1442 | | 1435 | |
| **52** | **GCA_032070965.1** | 116 | | 96 | | 98 | | 116 | | 1987 | | 1446 | | 1439 | |
| **53** | **GCA_032072835.1** | 1445 | | 1423 | | 1426 | | 1443 | | 3103 | | 183 | | 176 | |
| **54** | **GCA_032077145.1** | 117 | | 97 | | 98 | | 115 | | 1985 | | 1445 | | 1438 | |
| **55** | **GCA_032128025.1** | 10318 | | 10298 | | 10298 | | 10313 | | 10838 | | 11074 | | 11069 | |
| **56** | **GCA_032129715.1** | 122 | | 102 | | 102 | | 120 | | 1990 | | 1450 | | 1443 | |
| **57** | **GCA_032132495.1** | 140 | | 120 | | 121 | | 138 | | 2011 | | 1470 | | 1463 | |
| **58** | **GCA_032132835.1** | 172 | | 152 | | 154 | | 172 | | 2043 | | 1475 | | 1468 | |
| **59** | **GCA_032134135.1** | 1787 | | 1764 | | 1766 | | 1781 | | 3444 | | 528 | | 522 | |
| **60** | **GCA_032134975.1** | 132 | | 112 | | 113 | | 130 | | 2000 | | 1460 | | 1453 | |
| **61** | **GCA_032137635.1** | 104 | | 84 | | 86 | | 104 | | 1985 | | 1444 | | 1437 | |
| **62** | **GCA_032153315.1** | 117 | | 97 | | 99 | | 117 | | 1988 | | 1447 | | 1440 | |
| **63** | **GCA_032155885.1** | 108 | | 88 | | 89 | | 106 | | 1985 | | 1444 | | 1437 | |
| **64** | **GCA_032411785.1** | 122 | | 102 | | 104 | | 122 | | 1990 | | 1450 | | 1443 | |
| **65** | **GCA_033106885.1** | 9735 | | 9715 | | 9717 | | 9733 | | 10256 | | 10474 | | 10468 | |
| **66** | **GCA_033107445.1** | 9714 | | 9694 | | 9694 | | 9710 | | 10233 | | 10475 | | 10470 | |
| **67** | **GCA_033108425.1** | 1952 | | 1933 | | 1935 | | 1950 | | 3525 | | 748 | | 604 | |
| **68** | **GCA_033122545.1** | 220 | | 200 | | 202 | | 220 | | 2089 | | 1549 | | 1543 | |
| **69** | **GCA_900181095.1** | 259 | | 240 | | 240 | | 256 | | 2044 | | 1506 | | 1499 | |
| **70** | **GCA_900502575.1** | 107 | | 87 | | 87 | | 103 | | 1978 | | 1437 | | 1430 | |
| **71** | **GCA_900503265.1** | 1999 | | 1976 | | 1979 | | 1995 | | 140 | | 3118 | | 3111 | |
| **72** | **GCA_900504655.1** | 3198 | | 3175 | | 3178 | | 3194 | | 1383 | | 3926 | | 3919 | |
| **73** | **GCA_900504955.1** | 97 | | 77 | | 77 | | 93 | | 1976 | | 1437 | | 1430 | |
| **74** | **GCA_900506745.1** | 2001 | | 1978 | | 1981 | | 1997 | | 94 | | 3120 | | 3113 | |
| **75** | **GCA_900512545.1** | 111 | | 91 | | 92 | | 109 | | 1982 | | 1441 | | 1434 | |
| **76** | **GCF_024495065.1** | 1446 | | 1426 | | 1428 | | 1446 | | 3107 | | 184 | | 177 | |
| **77** | **GCF_024495515.1** | 1449 | | 1427 | | 1431 | | 1449 | | 3109 | | 185 | | 178 | |
| **78** | **SAMEA113605448** | 1451 | | 1431 | | 1433 | | 1451 | | 3104 | | 191 | | 184 | |
| **79** | **SAMEA113605746** | 406 | | 388 | | 388 | | 405 | | 2208 | | 1721 | | 1713 | |
| **80** | **SAMEA2052930** | 108 | | 87 | | 88 | | 104 | | 1988 | | 1446 | | 1439 | |
| **81** | **SAMEA2633723** | 9697 | | 9677 | | 9678 | | 9694 | | 10219 | | 10462 | | 10457 | |
| **82** | **SAMEA3281566** | 1466 | | 1444 | | 1447 | | 1464 | | 3123 | | 203 | | 126 | |
| **83** | **SAMEA5758680** | 98 | | 78 | | 79 | | 96 | | 1978 | | 1438 | | 1431 | |
| **84** | **SAMEA6155812** | 3247 | | 3227 | | 3230 | | 3243 | | 1435 | | 3978 | | 3967 | |
| **85** | **SAMEA6155829** | 3244 | | 3224 | | 3228 | | 3242 | | 1432 | | 3975 | | 3964 | |
| **86** | **SAMEA6155886** | 3247 | | 3227 | | 3230 | | 3243 | | 1435 | | 3978 | | 3967 | |
| **87** | **SAMEA6156048** | 3244 | | 3224 | | 3228 | | 3242 | | 1432 | | 3975 | | 3964 | |
| **88** | **SAMEA6375606** | 2067 | | 2044 | | 2048 | | 2065 | | 208 | | 3186 | | 3179 | |
| **89** | **SAMEA6635864** | 3244 | | 3224 | | 3228 | | 3242 | | 1432 | | 3975 | | 3964 | |
| **90** | **SAMEA6654214** | 3244 | | 3221 | | 3225 | | 3242 | | 1430 | | 3972 | | 3962 | |
| **91** | **SAMEA6654216** | 3247 | | 3224 | | 3228 | | 3245 | | 1432 | | 3975 | | 3964 | |
| **92** | **SAMEA6654217** | 3269 | | 3246 | | 3250 | | 3267 | | 1456 | | 3999 | | 3988 | |
| **93** | **SAMEA6654218** | 3256 | | 3233 | | 3238 | | 3256 | | 1441 | | 3984 | | 3973 | |
| **94** | **SAMEA7472332** | 244 | | 224 | | 226 | | 244 | | 2026 | | 1488 | | 1481 | |
| **95** | **SAMEA7472348** | 1532 | | 1513 | | 1513 | | 1525 | | 3191 | | 276 | | 271 | |
| **96** | **SAMN16197932** | 2026 | | 2003 | | 2007 | | 2024 | | 99 | | 3145 | | 3138 | |
| **97** | **SAMN16197933** | 2028 | | 2005 | | 2009 | | 2026 | | 101 | | 3147 | | 3140 | |
| **98** | **SAMN16197935** | 2025 | | 2002 | | 2006 | | 2023 | | 98 | | 3144 | | 3137 | |
| **99** | **SAMN17981712** | 1445 | | 1423 | | 1426 | | 1443 | | 3105 | | 183 | | 176 | |
| **snp-dists 0.8.2** | | | **43** | | **44** | | **45** | | **46** | | **47** | | **48** | | **49** |
| **GCA_026361275.1** | | **GCA_030786325.1** | | **GCA_030820975.1** | | **GCA_032044555.1** | | **GCA_032046295.1** | | **GCA_032062785.1** | | **GCA_032066125.1** |
| **1** | **A1** | | 241 | | 245 | | 3112 | | 1448 | | 1465 | | 1440 | | 1470 |
| **2** | **GCA_002186705.1** | | 121 | | 167 | | 3102 | | 1435 | | 1455 | | 1428 | | 1456 |
| **3** | **GCA_002186945.1** | | 121 | | 167 | | 3102 | | 1435 | | 1455 | | 1428 | | 1456 |
| **4** | **GCA_002187375.1** | | 3984 | | 3983 | | 1412 | | 3221 | | 3236 | | 3214 | | 3245 |
| **5** | **GCA_002187715.1** | | 168 | | 262 | | 3197 | | 1530 | | 1550 | | 1523 | | 1551 |
| **6** | **GCA_002188235.1** | | 158 | | 252 | | 3187 | | 1520 | | 1540 | | 1513 | | 1541 |
| **7** | **GCA_003195295.1** | | 615 | | 563 | | 3512 | | 1859 | | 1875 | | 1851 | | 1873 |
| **8** | **GCA_014788765.1** | | 3178 | | 3179 | | 83 | | 2006 | | 2019 | | 1998 | | 2026 |
| **9** | **GCA_015720195.1** | | 3196 | | 3190 | | 78 | | 2019 | | 2034 | | 2011 | | 2039 |
| **10** | **GCA_021441845.1** | | 270 | | 274 | | 3142 | | 1476 | | 1495 | | 1468 | | 1496 |
| **11** | **GCA_021920105.1** | | 158 | | 162 | | 3096 | | 1429 | | 1450 | | 1421 | | 1449 |
| **12** | **GCA_021920885.1** | | 1484 | | 1488 | | 1976 | | 213 | | 234 | | 205 | | 233 |
| **13** | **GCA_021920985.1** | | 1489 | | 1493 | | 1981 | | 218 | | 239 | | 210 | | 238 |
| **14** | **GCA_021925685.1** | | 1494 | | 1499 | | 1985 | | 138 | | 65 | | 38 | | 66 |
| **15** | **GCA_021926845.1** | | 1491 | | 1496 | | 1982 | | 136 | | 63 | | 36 | | 64 |
| **16** | **GCA_021928295.1** | | 1477 | | 1481 | | 1969 | | 118 | | 47 | | 18 | | 46 |
| **17** | **GCA_021928995.1** | | 1508 | | 1512 | | 1994 | | 151 | | 80 | | 51 | | 79 |
| **18** | **GCA_021929455.1** | | 1500 | | 1505 | | 1991 | | 145 | | 66 | | 41 | | 73 |
| **19** | **GCA_021933415.1** | | 10526 | | 10525 | | 10230 | | 9703 | | 9725 | | 9700 | | 9723 |
| **20** | **GCA_021956765.1** | | 3281 | | 3282 | | 254 | | 2109 | | 2122 | | 2101 | | 2129 |
| **21** | **GCA_021957705.1** | | 3156 | | 3154 | | 39 | | 1981 | | 1995 | | 1973 | | 2002 |
| **22** | **GCA_022048705.1** | | 151 | | 205 | | 3118 | | 1451 | | 1471 | | 1444 | | 1471 |
| **23** | **GCA_022061125.1** | | 3157 | | 3152 | | 42 | | 1983 | | 1998 | | 1975 | | 2003 |
| **24** | **GCA_022084535.1** | | 3140 | | 3140 | | 25 | | 1966 | | 1981 | | 1958 | | 1986 |
| **25** | **GCA_022176145.1** | | 3984 | | 3980 | | 1415 | | 3221 | | 3239 | | 3215 | | 3243 |
| **26** | **GCA_022176185.1** | | 3982 | | 3978 | | 1412 | | 3221 | | 3236 | | 3215 | | 3243 |
| **27** | **GCA_022176205.1** | | 3991 | | 3984 | | 1419 | | 3226 | | 3243 | | 3220 | | 3250 |
| **28** | **GCA_022176585.1** | | 3988 | | 3984 | | 1418 | | 3227 | | 3242 | | 3221 | | 3249 |
| **29** | **GCA_022176645.1** | | 3985 | | 3981 | | 1415 | | 3224 | | 3239 | | 3218 | | 3246 |
| **30** | **GCA_022233245.1** | | 229 | | 234 | | 3102 | | 1438 | | 1455 | | 1430 | | 1458 |
| **31** | **GCA_022233305.1** | | 252 | | 253 | | 3125 | | 1461 | | 1478 | | 1453 | | 1481 |
| **32** | **GCA_022233405.1** | | 10487 | | 10487 | | 10194 | | 9665 | | 9688 | | 9662 | | 9688 |
| **33** | **GCA_022250515.1** | | 1458 | | 1462 | | 1950 | | 187 | | 208 | | 179 | | 207 |
| **34** | **GCA_022270255.1** | | 1481 | | 1486 | | 1973 | | 124 | | 117 | | 90 | | 118 |
| **35** | **GCA_022270275.1** | | 1526 | | 1530 | | 2016 | | 167 | | 160 | | 133 | | 163 |
| **36** | **GCA_022270495.1** | | 1506 | | 1510 | | 1998 | | 147 | | 142 | | 113 | | 141 |
| **37** | **GCA_022270575.1** | | 1484 | | 1488 | | 1975 | | 127 | | 122 | | 93 | | 121 |
| **38** | **GCA_022270615.1** | | 1488 | | 1490 | | 1978 | | 128 | | 122 | | 94 | | 123 |
| **39** | **GCA_022270695.1** | | 1503 | | 1508 | | 1994 | | 145 | | 138 | | 111 | | 141 |
| **40** | **GCA_024392555.1** | | 3166 | | 3166 | | 51 | | 1992 | | 2007 | | 1984 | | 2012 |
| **41** | **GCA_024474865.1** | | 244 | | 248 | | 3117 | | 1451 | | 1470 | | 1443 | | 1471 |
| **42** | **GCA_025101225.1** | | 237 | | 237 | | 3110 | | 1444 | | 1463 | | 1436 | | 1464 |
| **43** | **GCA_026361275.1** | | 0 | | 218 | | 3151 | | 1484 | | 1504 | | 1477 | | 1507 |
| **44** | **GCA_030786325.1** | | 218 | | 0 | | 3151 | | 1490 | | 1508 | | 1482 | | 1511 |
| **45** | **GCA_030820975.1** | | 3151 | | 3151 | | 0 | | 1977 | | 1990 | | 1969 | | 1999 |
| **46** | **GCA_032044555.1** | | 1484 | | 1490 | | 1977 | | 0 | | 147 | | 120 | | 148 |
| **47** | **GCA_032046295.1** | | 1504 | | 1508 | | 1990 | | 147 | | 0 | | 47 | | 77 |
| **48** | **GCA_032062785.1** | | 1477 | | 1482 | | 1969 | | 120 | | 47 | | 0 | | 48 |
| **49** | **GCA_032066125.1** | | 1507 | | 1511 | | 1999 | | 148 | | 77 | | 48 | | 0 |
| **50** | **GCA_032066145.1** | | 1481 | | 1486 | | 1973 | | 124 | | 51 | | 24 | | 52 |
| **51** | **GCA_032070585.1** | | 1478 | | 1482 | | 1969 | | 120 | | 50 | | 20 | | 49 |
| **52** | **GCA_032070965.1** | | 1482 | | 1486 | | 1974 | | 123 | | 52 | | 23 | | 51 |
| **53** | **GCA_032072835.1** | | 151 | | 156 | | 3088 | | 1426 | | 1443 | | 1418 | | 1446 |
| **54** | **GCA_032077145.1** | | 1479 | | 1484 | | 1970 | | 124 | | 51 | | 24 | | 52 |
| **55** | **GCA_032128025.1** | | 11109 | | 11108 | | 10819 | | 10293 | | 10315 | | 10290 | | 10315 |
| **56** | **GCA_032129715.1** | | 1486 | | 1488 | | 1975 | | 128 | | 56 | | 28 | | 57 |
| **57** | **GCA_032132495.1** | | 1503 | | 1509 | | 1996 | | 147 | | 74 | | 47 | | 75 |
| **58** | **GCA_032132835.1** | | 1511 | | 1515 | | 2030 | | 179 | | 108 | | 79 | | 107 |
| **59** | **GCA_032134135.1** | | 566 | | 569 | | 3427 | | 1764 | | 1783 | | 1757 | | 1786 |
| **60** | **GCA_032134975.1** | | 1494 | | 1499 | | 1985 | | 139 | | 66 | | 39 | | 66 |
| **61** | **GCA_032137635.1** | | 1480 | | 1484 | | 1972 | | 120 | | 116 | | 87 | | 115 |
| **62** | **GCA_032153315.1** | | 1483 | | 1487 | | 1975 | | 124 | | 53 | | 24 | | 52 |
| **63** | **GCA_032155885.1** | | 1478 | | 1483 | | 1970 | | 125 | | 118 | | 91 | | 118 |
| **64** | **GCA_032411785.1** | | 1486 | | 1490 | | 1977 | | 129 | | 58 | | 29 | | 57 |
| **65** | **GCA_033106885.1** | | 10511 | | 10510 | | 10242 | | 9710 | | 9736 | | 9707 | | 9732 |
| **66** | **GCA_033107445.1** | | 10513 | | 10509 | | 10217 | | 9690 | | 9713 | | 9687 | | 9711 |
| **67** | **GCA_033108425.1** | | 785 | | 792 | | 3512 | | 1934 | | 1950 | | 1927 | | 1955 |
| **68** | **GCA_033122545.1** | | 1586 | | 1590 | | 2076 | | 227 | | 198 | | 169 | | 197 |
| **69** | **GCA_900181095.1** | | 1518 | | 1522 | | 2027 | | 239 | | 258 | | 231 | | 261 |
| **70** | **GCA_900502575.1** | | 1471 | | 1475 | | 1961 | | 112 | | 39 | | 12 | | 42 |
| **71** | **GCA_900503265.1** | | 3152 | | 3152 | | 123 | | 1978 | | 1991 | | 1970 | | 2000 |
| **72** | **GCA_900504655.1** | | 3938 | | 3937 | | 1366 | | 3175 | | 3190 | | 3168 | | 3199 |
| **73** | **GCA_900504955.1** | | 1471 | | 1475 | | 1959 | | 112 | | 105 | | 78 | | 108 |
| **74** | **GCA_900506745.1** | | 3154 | | 3154 | | 77 | | 1980 | | 1993 | | 1972 | | 2002 |
| **75** | **GCA_900512545.1** | | 1475 | | 1480 | | 1967 | | 118 | | 45 | | 18 | | 46 |
| **76** | **GCF_024495065.1** | | 222 | | 226 | | 3094 | | 1427 | | 1448 | | 1419 | | 1445 |
| **77** | **GCF_024495515.1** | | 223 | | 227 | | 3096 | | 1430 | | 1449 | | 1422 | | 1448 |
| **78** | **SAMEA113605448** | | 161 | | 165 | | 3091 | | 1432 | | 1453 | | 1424 | | 1452 |
| **79** | **SAMEA113605746** | | 1756 | | 1760 | | 2193 | | 412 | | 383 | | 357 | | 384 |
| **80** | **SAMEA2052930** | | 1480 | | 1484 | | 1971 | | 123 | | 115 | | 89 | | 119 |
| **81** | **SAMEA2633723** | | 10498 | | 10496 | | 10203 | | 9675 | | 9696 | | 9671 | | 9694 |
| **82** | **SAMEA3281566** | | 239 | | 244 | | 3108 | | 1447 | | 1464 | | 1439 | | 1467 |
| **83** | **SAMEA5758680** | | 1472 | | 1477 | | 1963 | | 115 | | 108 | | 81 | | 108 |
| **84** | **SAMEA6155812** | | 3990 | | 3982 | | 1418 | | 3224 | | 3239 | | 3217 | | 3248 |
| **85** | **SAMEA6155829** | | 3987 | | 3980 | | 1417 | | 3224 | | 3238 | | 3217 | | 3245 |
| **86** | **SAMEA6155886** | | 3990 | | 3982 | | 1418 | | 3224 | | 3239 | | 3217 | | 3248 |
| **87** | **SAMEA6156048** | | 3987 | | 3980 | | 1417 | | 3224 | | 3238 | | 3217 | | 3245 |
| **88** | **SAMEA6375606** | | 3220 | | 3221 | | 193 | | 2048 | | 2061 | | 2040 | | 2068 |
| **89** | **SAMEA6635864** | | 3987 | | 3980 | | 1417 | | 3224 | | 3238 | | 3217 | | 3245 |
| **90** | **SAMEA6654214** | | 3985 | | 3981 | | 1415 | | 3224 | | 3239 | | 3218 | | 3246 |
| **91** | **SAMEA6654216** | | 3987 | | 3983 | | 1417 | | 3226 | | 3241 | | 3220 | | 3248 |
| **92** | **SAMEA6654217** | | 4011 | | 4007 | | 1441 | | 3248 | | 3263 | | 3242 | | 3270 |
| **93** | **SAMEA6654218** | | 3998 | | 3993 | | 1428 | | 3234 | | 3252 | | 3228 | | 3257 |
| **94** | **SAMEA7472332** | | 1502 | | 1506 | | 2013 | | 225 | | 246 | | 217 | | 243 |
| **95** | **SAMEA7472348** | | 114 | | 250 | | 3174 | | 1508 | | 1532 | | 1504 | | 1535 |
| **96** | **SAMN16197932** | | 3179 | | 3180 | | 84 | | 2007 | | 2020 | | 1999 | | 2027 |
| **97** | **SAMN16197933** | | 3181 | | 3182 | | 86 | | 2009 | | 2022 | | 2001 | | 2029 |
| **98** | **SAMN16197935** | | 3178 | | 3179 | | 83 | | 2006 | | 2019 | | 1998 | | 2026 |
| **99** | **SAMN17981712** | | 143 | | 176 | | 3090 | | 1425 | | 1443 | | 1418 | | 1446 |

| **snp-dists 0.8.2** | | **50** | **51** | **52** | **53** | **54** | **55** | **56** |
| --- | --- | --- | --- | --- | --- | --- | --- | --- |
| **GCA_032066145.1** | **GCA_032070585.1** | **GCA_032070965.1** | **GCA_032072835.1** | **GCA_032077145.1** | **GCA_032128025.1** | **GCA_032129715.1** |
| **1** | **A1** | 1444 | 1441 | 1445 | 180 | 1442 | 11070 | 1446 |
| **2** | **GCA_002186705.1** | 1432 | 1427 | 1431 | 102 | 1430 | 11053 | 1435 |
| **3** | **GCA_002186945.1** | 1432 | 1427 | 1431 | 102 | 1430 | 11051 | 1435 |
| **4** | **GCA_002187375.1** | 3216 | 3214 | 3220 | 3920 | 3215 | 11442 | 3221 |
| **5** | **GCA_002187715.1** | 1527 | 1522 | 1526 | 197 | 1525 | 11152 | 1530 |
| **6** | **GCA_002188235.1** | 1517 | 1512 | 1516 | 187 | 1515 | 11144 | 1520 |
| **7** | **GCA_003195295.1** | 1853 | 1849 | 1854 | 558 | 1853 | 11272 | 1855 |
| **8** | **GCA_014788765.1** | 2002 | 1995 | 2001 | 3117 | 1999 | 10848 | 2003 |
| **9** | **GCA_015720195.1** | 2015 | 2009 | 2014 | 3127 | 2012 | 10863 | 2017 |
| **10** | **GCA_021441845.1** | 1472 | 1467 | 1471 | 209 | 1470 | 11102 | 1475 |
| **11** | **GCA_021920105.1** | 1425 | 1422 | 1424 | 97 | 1425 | 11052 | 1430 |
| **12** | **GCA_021920885.1** | 209 | 206 | 208 | 1423 | 209 | 10297 | 214 |
| **13** | **GCA_021920985.1** | 214 | 211 | 213 | 1428 | 214 | 10302 | 219 |
| **14** | **GCA_021925685.1** | 41 | 38 | 41 | 1435 | 42 | 10307 | 46 |
| **15** | **GCA_021926845.1** | 38 | 36 | 39 | 1432 | 40 | 10304 | 44 |
| **16** | **GCA_021928295.1** | 21 | 19 | 21 | 1416 | 22 | 10289 | 27 |
| **17** | **GCA_021928995.1** | 53 | 52 | 54 | 1447 | 55 | 10315 | 60 |
| **18** | **GCA_021929455.1** | 48 | 39 | 48 | 1441 | 43 | 10315 | 47 |
| **19** | **GCA_021933415.1** | 9704 | 9700 | 9702 | 10465 | 9700 | 684 | 9698 |
| **20** | **GCA_021956765.1** | 2105 | 2097 | 2104 | 3220 | 2102 | 10946 | 2106 |
| **21** | **GCA_021957705.1** | 1977 | 1972 | 1977 | 3092 | 1974 | 10825 | 1978 |
| **22** | **GCA_022048705.1** | 1448 | 1443 | 1447 | 140 | 1446 | 11075 | 1451 |
| **23** | **GCA_022061125.1** | 1979 | 1972 | 1978 | 3094 | 1976 | 10808 | 1981 |
| **24** | **GCA_022084535.1** | 1962 | 1956 | 1961 | 3077 | 1959 | 10812 | 1964 |
| **25** | **GCA_022176145.1** | 3216 | 3215 | 3218 | 3923 | 3219 | 11447 | 3223 |
| **26** | **GCA_022176185.1** | 3217 | 3212 | 3218 | 3921 | 3216 | 11448 | 3220 |
| **27** | **GCA_022176205.1** | 3222 | 3220 | 3225 | 3926 | 3221 | 11454 | 3226 |
| **28** | **GCA_022176585.1** | 3223 | 3218 | 3224 | 3927 | 3222 | 11453 | 3226 |
| **29** | **GCA_022176645.1** | 3220 | 3215 | 3221 | 3924 | 3219 | 11450 | 3223 |
| **30** | **GCA_022233245.1** | 1434 | 1428 | 1433 | 170 | 1432 | 11062 | 1436 |
| **31** | **GCA_022233305.1** | 1457 | 1451 | 1456 | 193 | 1455 | 11080 | 1459 |
| **32** | **GCA_022233405.1** | 9665 | 9666 | 9667 | 10425 | 9662 | 776 | 9662 |
| **33** | **GCA_022250515.1** | 183 | 180 | 182 | 1397 | 183 | 10263 | 188 |
| **34** | **GCA_022270255.1** | 93 | 90 | 93 | 1422 | 94 | 10293 | 98 |
| **35** | **GCA_022270275.1** | 136 | 136 | 138 | 1465 | 137 | 10332 | 142 |
| **36** | **GCA_022270495.1** | 116 | 114 | 116 | 1445 | 117 | 10318 | 122 |
| **37** | **GCA_022270575.1** | 96 | 94 | 96 | 1423 | 97 | 10298 | 102 |
| **38** | **GCA_022270615.1** | 97 | 96 | 98 | 1426 | 98 | 10298 | 102 |
| **39** | **GCA_022270695.1** | 114 | 114 | 116 | 1443 | 115 | 10313 | 120 |
| **40** | **GCA_024392555.1** | 1988 | 1982 | 1987 | 3103 | 1985 | 10838 | 1990 |
| **41** | **GCA_024474865.1** | 1447 | 1442 | 1446 | 183 | 1445 | 11074 | 1450 |
| **42** | **GCA_025101225.1** | 1440 | 1435 | 1439 | 176 | 1438 | 11069 | 1443 |
| **43** | **GCA_026361275.1** | 1481 | 1478 | 1482 | 151 | 1479 | 11109 | 1486 |
| **44** | **GCA_030786325.1** | 1486 | 1482 | 1486 | 156 | 1484 | 11108 | 1488 |
| **45** | **GCA_030820975.1** | 1973 | 1969 | 1974 | 3088 | 1970 | 10819 | 1975 |
| **46** | **GCA_032044555.1** | 124 | 120 | 123 | 1426 | 124 | 10293 | 128 |
| **47** | **GCA_032046295.1** | 51 | 50 | 52 | 1443 | 51 | 10315 | 56 |
| **48** | **GCA_032062785.1** | 24 | 20 | 23 | 1418 | 24 | 10290 | 28 |
| **49** | **GCA_032066125.1** | 52 | 49 | 51 | 1446 | 52 | 10315 | 57 |
| **50** | **GCA_032066145.1** | 0 | 24 | 27 | 1422 | 28 | 10294 | 32 |
| **51** | **GCA_032070585.1** | 24 | 0 | 24 | 1416 | 24 | 10293 | 30 |
| **52** | **GCA_032070965.1** | 27 | 24 | 0 | 1421 | 27 | 10294 | 32 |
| **53** | **GCA_032072835.1** | 1422 | 1416 | 1421 | 0 | 1419 | 11047 | 1424 |
| **54** | **GCA_032077145.1** | 28 | 24 | 27 | 1419 | 0 | 10290 | 32 |
| **55** | **GCA_032128025.1** | 10294 | 10293 | 10294 | 11047 | 10290 | 0 | 10289 |
| **56** | **GCA_032129715.1** | 32 | 30 | 32 | 1424 | 32 | 10289 | 0 |
| **57** | **GCA_032132495.1** | 51 | 47 | 50 | 1444 | 51 | 10316 | 55 |
| **58** | **GCA_032132835.1** | 83 | 80 | 82 | 1450 | 83 | 10338 | 88 |
| **59** | **GCA_032134135.1** | 1762 | 1759 | 1763 | 505 | 1759 | 11359 | 1765 |
| **60** | **GCA_032134975.1** | 42 | 39 | 42 | 1435 | 43 | 10309 | 47 |
| **61** | **GCA_032137635.1** | 91 | 87 | 89 | 1419 | 91 | 10293 | 95 |
| **62** | **GCA_032153315.1** | 28 | 25 | 27 | 1422 | 28 | 10296 | 33 |
| **63** | **GCA_032155885.1** | 95 | 91 | 94 | 1419 | 95 | 10294 | 99 |
| **64** | **GCA_032411785.1** | 33 | 30 | 32 | 1424 | 17 | 10298 | 38 |
| **65** | **GCA_033106885.1** | 9709 | 9708 | 9711 | 10447 | 9707 | 831 | 9708 |
| **66** | **GCA_033107445.1** | 9691 | 9689 | 9690 | 10449 | 9687 | 814 | 9685 |
| **67** | **GCA_033108425.1** | 1929 | 1927 | 1931 | 725 | 1930 | 11162 | 1934 |
| **68** | **GCA_033122545.1** | 173 | 170 | 172 | 1525 | 173 | 10383 | 178 |
| **69** | **GCA_900181095.1** | 235 | 234 | 236 | 1457 | 235 | 10329 | 240 |
| **70** | **GCA_900502575.1** | 16 | 15 | 17 | 1410 | 16 | 10282 | 21 |
| **71** | **GCA_900503265.1** | 1974 | 1970 | 1975 | 3089 | 1971 | 10818 | 1976 |
| **72** | **GCA_900504655.1** | 3170 | 3169 | 3174 | 3874 | 3169 | 11410 | 3175 |
| **73** | **GCA_900504955.1** | 82 | 81 | 83 | 1410 | 82 | 10278 | 87 |
| **74** | **GCA_900506745.1** | 1976 | 1971 | 1977 | 3091 | 1973 | 10821 | 1978 |
| **75** | **GCA_900512545.1** | 22 | 18 | 21 | 1416 | 22 | 10288 | 26 |
| **76** | **GCF_024495065.1** | 1423 | 1420 | 1422 | 161 | 1423 | 11053 | 1427 |
| **77** | **GCF_024495515.1** | 1426 | 1421 | 1425 | 162 | 1424 | 11056 | 1428 |
| **78** | **SAMEA113605448** | 1428 | 1425 | 1427 | 6 | 1427 | 11033 | 1433 |
| **79** | **SAMEA113605746** | 361 | 356 | 359 | 1697 | 361 | 10355 | 364 |
| **80** | **SAMEA2052930** | 93 | 91 | 94 | 1419 | 92 | 10293 | 97 |
| **81** | **SAMEA2633723** | 9675 | 9671 | 9673 | 10437 | 9671 | 784 | 9669 |
| **82** | **SAMEA3281566** | 1443 | 1437 | 1442 | 180 | 1441 | 11066 | 1445 |
| **83** | **SAMEA5758680** | 85 | 81 | 84 | 1413 | 85 | 10278 | 89 |
| **84** | **SAMEA6155812** | 3219 | 3220 | 3223 | 3926 | 3218 | 11455 | 3227 |
| **85** | **SAMEA6155829** | 3219 | 3216 | 3220 | 3926 | 3218 | 11454 | 3225 |
| **86** | **SAMEA6155886** | 3219 | 3220 | 3223 | 3926 | 3218 | 11455 | 3227 |
| **87** | **SAMEA6156048** | 3219 | 3216 | 3220 | 3926 | 3218 | 11454 | 3225 |
| **88** | **SAMEA6375606** | 2044 | 2036 | 2043 | 3159 | 2041 | 10888 | 2045 |
| **89** | **SAMEA6635864** | 3219 | 3216 | 3220 | 3926 | 3218 | 11454 | 3225 |
| **90** | **SAMEA6654214** | 3220 | 3215 | 3221 | 3924 | 3219 | 11438 | 3223 |
| **91** | **SAMEA6654216** | 3222 | 3217 | 3223 | 3926 | 3221 | 11452 | 3225 |
| **92** | **SAMEA6654217** | 3244 | 3239 | 3245 | 3950 | 3242 | 11466 | 3247 |
| **93** | **SAMEA6654218** | 3230 | 3227 | 3232 | 3934 | 3229 | 11462 | 3235 |
| **94** | **SAMEA7472332** | 221 | 218 | 220 | 1441 | 221 | 10337 | 226 |
| **95** | **SAMEA7472348** | 1507 | 1507 | 1509 | 184 | 1508 | 11102 | 1513 |
| **96** | **SAMN16197932** | 2003 | 1996 | 2002 | 3118 | 2000 | 10849 | 2004 |
| **97** | **SAMN16197933** | 2005 | 1998 | 2004 | 3120 | 2002 | 10848 | 2006 |
| **98** | **SAMN16197935** | 2002 | 1995 | 2001 | 3117 | 1999 | 10848 | 2003 |
| **99** | **SAMN17981712** | 1422 | 1416 | 1421 | 110 | 1420 | 11044 | 1424 |

| **snp-dists 0.8.2** | | **57** | **58** | **59** | **60** | **61** | **62** | **63** |
| --- | --- | --- | --- | --- | --- | --- | --- | --- |
| **GCA_032132495.1** | **GCA_032132835.1** | **GCA_032134135.1** | **GCA_032134975.1** | **GCA_032137635.1** | **GCA_032153315.1** | **GCA_032155885.1** |
| **1** | **A1** | 1467 | 1474 | 525 | 1456 | 1443 | 1446 | 1441 |
| **2** | **GCA_002186705.1** | 1455 | 1460 | 515 | 1445 | 1429 | 1432 | 1429 |
| **3** | **GCA_002186945.1** | 1455 | 1460 | 516 | 1445 | 1429 | 1432 | 1429 |
| **4** | **GCA_002187375.1** | 3241 | 3276 | 4276 | 3230 | 3218 | 3221 | 3215 |
| **5** | **GCA_002187715.1** | 1550 | 1555 | 610 | 1540 | 1524 | 1527 | 1523 |
| **6** | **GCA_002188235.1** | 1540 | 1545 | 601 | 1530 | 1514 | 1517 | 1513 |
| **7** | **GCA_003195295.1** | 1878 | 1883 | 957 | 1866 | 1852 | 1855 | 1853 |
| **8** | **GCA_014788765.1** | 2025 | 2057 | 3454 | 2014 | 1999 | 2002 | 1999 |
| **9** | **GCA_015720195.1** | 2038 | 2070 | 3468 | 2027 | 2012 | 2015 | 2012 |
| **10** | **GCA_021441845.1** | 1495 | 1500 | 553 | 1484 | 1469 | 1472 | 1469 |
| **11** | **GCA_021920105.1** | 1447 | 1453 | 512 | 1440 | 1422 | 1425 | 1422 |
| **12** | **GCA_021920885.1** | 232 | 264 | 1764 | 224 | 206 | 209 | 210 |
| **13** | **GCA_021920985.1** | 237 | 269 | 1769 | 229 | 211 | 214 | 215 |
| **14** | **GCA_021925685.1** | 65 | 97 | 1773 | 57 | 105 | 42 | 109 |
| **15** | **GCA_021926845.1** | 63 | 95 | 1771 | 55 | 103 | 40 | 107 |
| **16** | **GCA_021928295.1** | 45 | 77 | 1758 | 35 | 85 | 22 | 89 |
| **17** | **GCA_021928995.1** | 78 | 110 | 1789 | 68 | 118 | 55 | 122 |
| **18** | **GCA_021929455.1** | 72 | 104 | 1781 | 56 | 112 | 49 | 116 |
| **19** | **GCA_021933415.1** | 9727 | 9746 | 10777 | 9719 | 9701 | 9704 | 9704 |
| **20** | **GCA_021956765.1** | 2127 | 2160 | 3559 | 2117 | 2102 | 2105 | 2102 |
| **21** | **GCA_021957705.1** | 2001 | 2033 | 3432 | 1989 | 1975 | 1978 | 1974 |
| **22** | **GCA_022048705.1** | 1471 | 1476 | 532 | 1461 | 1445 | 1448 | 1445 |
| **23** | **GCA_022061125.1** | 2002 | 2034 | 3434 | 1991 | 1976 | 1979 | 1976 |
| **24** | **GCA_022084535.1** | 1985 | 2017 | 3418 | 1974 | 1959 | 1962 | 1959 |
| **25** | **GCA_022176145.1** | 3242 | 3274 | 4281 | 3234 | 3216 | 3219 | 3216 |
| **26** | **GCA_022176185.1** | 3242 | 3274 | 4279 | 3231 | 3216 | 3219 | 3216 |
| **27** | **GCA_022176205.1** | 3247 | 3281 | 4286 | 3236 | 3223 | 3226 | 3221 |
| **28** | **GCA_022176585.1** | 3248 | 3280 | 4285 | 3237 | 3222 | 3225 | 3222 |
| **29** | **GCA_022176645.1** | 3245 | 3277 | 4282 | 3234 | 3219 | 3222 | 3219 |
| **30** | **GCA_022233245.1** | 1457 | 1462 | 514 | 1447 | 1431 | 1434 | 1431 |
| **31** | **GCA_022233305.1** | 1480 | 1485 | 537 | 1470 | 1454 | 1457 | 1454 |
| **32** | **GCA_022233405.1** | 9688 | 9711 | 10737 | 9681 | 9666 | 9669 | 9666 |
| **33** | **GCA_022250515.1** | 206 | 238 | 1739 | 198 | 180 | 183 | 184 |
| **34** | **GCA_022270255.1** | 117 | 149 | 1762 | 109 | 81 | 94 | 85 |
| **35** | **GCA_022270275.1** | 160 | 194 | 1805 | 152 | 126 | 139 | 128 |
| **36** | **GCA_022270495.1** | 140 | 172 | 1787 | 132 | 104 | 117 | 108 |
| **37** | **GCA_022270575.1** | 120 | 152 | 1764 | 112 | 84 | 97 | 88 |
| **38** | **GCA_022270615.1** | 121 | 154 | 1766 | 113 | 86 | 99 | 89 |
| **39** | **GCA_022270695.1** | 138 | 172 | 1781 | 130 | 104 | 117 | 106 |
| **40** | **GCA_024392555.1** | 2011 | 2043 | 3444 | 2000 | 1985 | 1988 | 1985 |
| **41** | **GCA_024474865.1** | 1470 | 1475 | 528 | 1460 | 1444 | 1447 | 1444 |
| **42** | **GCA_025101225.1** | 1463 | 1468 | 522 | 1453 | 1437 | 1440 | 1437 |
| **43** | **GCA_026361275.1** | 1503 | 1511 | 566 | 1494 | 1480 | 1483 | 1478 |
| **44** | **GCA_030786325.1** | 1509 | 1515 | 569 | 1499 | 1484 | 1487 | 1483 |
| **45** | **GCA_030820975.1** | 1996 | 2030 | 3427 | 1985 | 1972 | 1975 | 1970 |
| **46** | **GCA_032044555.1** | 147 | 179 | 1764 | 139 | 120 | 124 | 125 |
| **47** | **GCA_032046295.1** | 74 | 108 | 1783 | 66 | 116 | 53 | 118 |
| **48** | **GCA_032062785.1** | 47 | 79 | 1757 | 39 | 87 | 24 | 91 |
| **49** | **GCA_032066125.1** | 75 | 107 | 1786 | 66 | 115 | 52 | 118 |
| **50** | **GCA_032066145.1** | 51 | 83 | 1762 | 42 | 91 | 28 | 95 |
| **51** | **GCA_032070585.1** | 47 | 80 | 1759 | 39 | 87 | 25 | 91 |
| **52** | **GCA_032070965.1** | 50 | 82 | 1763 | 42 | 89 | 27 | 94 |
| **53** | **GCA_032072835.1** | 1444 | 1450 | 505 | 1435 | 1419 | 1422 | 1419 |
| **54** | **GCA_032077145.1** | 51 | 83 | 1759 | 43 | 91 | 28 | 95 |
| **55** | **GCA_032128025.1** | 10316 | 10338 | 11359 | 10309 | 10293 | 10296 | 10294 |
| **56** | **GCA_032129715.1** | 55 | 88 | 1765 | 47 | 95 | 33 | 99 |
| **57** | **GCA_032132495.1** | 0 | 106 | 1785 | 66 | 114 | 51 | 118 |
| **58** | **GCA_032132835.1** | 106 | 0 | 1792 | 98 | 146 | 83 | 150 |
| **59** | **GCA_032134135.1** | 1785 | 1792 | 0 | 1774 | 1761 | 1764 | 1759 |
| **60** | **GCA_032134975.1** | 66 | 98 | 1774 | 0 | 106 | 43 | 110 |
| **61** | **GCA_032137635.1** | 114 | 146 | 1761 | 106 | 0 | 91 | 82 |
| **62** | **GCA_032153315.1** | 51 | 83 | 1764 | 43 | 91 | 0 | 95 |
| **63** | **GCA_032155885.1** | 118 | 150 | 1759 | 110 | 82 | 95 | 0 |
| **64** | **GCA_032411785.1** | 56 | 88 | 1766 | 48 | 96 | 33 | 100 |
| **65** | **GCA_033106885.1** | 9732 | 9755 | 10762 | 9725 | 9710 | 9713 | 9712 |
| **66** | **GCA_033107445.1** | 9713 | 9734 | 10758 | 9705 | 9689 | 9692 | 9691 |
| **67** | **GCA_033108425.1** | 1952 | 1957 | 1059 | 1943 | 1927 | 1932 | 1927 |
| **68** | **GCA_033122545.1** | 196 | 228 | 1866 | 188 | 194 | 173 | 198 |
| **69** | **GCA_900181095.1** | 258 | 291 | 1818 | 250 | 234 | 237 | 236 |
| **70** | **GCA_900502575.1** | 39 | 73 | 1750 | 31 | 81 | 18 | 83 |
| **71** | **GCA_900503265.1** | 1997 | 2031 | 3428 | 1986 | 1973 | 1976 | 1971 |
| **72** | **GCA_900504655.1** | 3195 | 3230 | 4233 | 3184 | 3172 | 3175 | 3169 |
| **73** | **GCA_900504955.1** | 105 | 139 | 1750 | 97 | 69 | 84 | 73 |
| **74** | **GCA_900506745.1** | 1998 | 2033 | 3430 | 1988 | 1975 | 1978 | 1973 |
| **75** | **GCA_900512545.1** | 45 | 77 | 1756 | 37 | 85 | 22 | 89 |
| **76** | **GCF_024495065.1** | 1446 | 1451 | 508 | 1437 | 1419 | 1423 | 1420 |
| **77** | **GCF_024495515.1** | 1449 | 1454 | 509 | 1438 | 1423 | 1426 | 1423 |
| **78** | **SAMEA113605448** | 1451 | 1456 | 515 | 1443 | 1424 | 1428 | 1425 |
| **79** | **SAMEA113605746** | 383 | 413 | 2033 | 376 | 382 | 361 | 386 |
| **80** | **SAMEA2052930** | 116 | 150 | 1759 | 107 | 80 | 95 | 84 |
| **81** | **SAMEA2633723** | 9697 | 9717 | 10748 | 9690 | 9672 | 9675 | 9675 |
| **82** | **SAMEA3281566** | 1466 | 1471 | 525 | 1456 | 1440 | 1443 | 1440 |
| **83** | **SAMEA5758680** | 108 | 140 | 1753 | 100 | 72 | 85 | 72 |
| **84** | **SAMEA6155812** | 3245 | 3279 | 4282 | 3233 | 3224 | 3224 | 3221 |
| **85** | **SAMEA6155829** | 3244 | 3276 | 4281 | 3233 | 3221 | 3221 | 3221 |
| **86** | **SAMEA6155886** | 3244 | 3279 | 4282 | 3233 | 3224 | 3224 | 3221 |
| **87** | **SAMEA6156048** | 3244 | 3276 | 4281 | 3233 | 3221 | 3221 | 3221 |
| **88** | **SAMEA6375606** | 2067 | 2099 | 3498 | 2056 | 2041 | 2044 | 2041 |
| **89** | **SAMEA6635864** | 3244 | 3276 | 4281 | 3233 | 3221 | 3221 | 3221 |
| **90** | **SAMEA6654214** | 3245 | 3277 | 4282 | 3234 | 3219 | 3222 | 3219 |
| **91** | **SAMEA6654216** | 3247 | 3279 | 4284 | 3236 | 3221 | 3224 | 3221 |
| **92** | **SAMEA6654217** | 3269 | 3301 | 4308 | 3258 | 3243 | 3246 | 3243 |
| **93** | **SAMEA6654218** | 3255 | 3288 | 4295 | 3244 | 3230 | 3233 | 3229 |
| **94** | **SAMEA7472332** | 244 | 275 | 1804 | 236 | 218 | 221 | 222 |
| **95** | **SAMEA7472348** | 1530 | 1539 | 592 | 1522 | 1508 | 1511 | 1505 |
| **96** | **SAMN16197932** | 2026 | 2058 | 3455 | 2015 | 2000 | 2003 | 2000 |
| **97** | **SAMN16197933** | 2028 | 2060 | 3457 | 2017 | 2002 | 2005 | 2002 |
| **98** | **SAMN16197935** | 2025 | 2057 | 3454 | 2014 | 1999 | 2002 | 1999 |
| **99** | **SAMN17981712** | 1445 | 1450 | 505 | 1435 | 1419 | 1422 | 1419 |
|  |  |  |  |  |  |  |  |  |
| **snp-dists 0.8.2** | | **64** | **65** | **66** | **67** | **68** | **69** | **70** |
| **GCA_032411785.1** | **GCA_033106885.1** | **GCA_033107445.1** | **GCA_033108425.1** | **GCA_033122545.1** | **GCA_900181095.1** | **GCA_900502575.1** |
| **1** | **A1** | 1449 | 10474 | 10473 | 744 | 1548 | 1501 | 1432 |
| **2** | **GCA_002186705.1** | 1435 | 10453 | 10453 | 736 | 1535 | 1469 | 1422 |
| **3** | **GCA_002186945.1** | 1435 | 10451 | 10453 | 735 | 1535 | 1469 | 1422 |
| **4** | **GCA_002187375.1** | 3223 | 10870 | 10845 | 4332 | 3322 | 3252 | 3207 |
| **5** | **GCA_002187715.1** | 1530 | 10553 | 10554 | 818 | 1629 | 1564 | 1517 |
| **6** | **GCA_002188235.1** | 1520 | 10545 | 10546 | 819 | 1619 | 1554 | 1507 |
| **7** | **GCA_003195295.1** | 1858 | 10668 | 10673 | 1163 | 1952 | 1889 | 1843 |
| **8** | **GCA_014788765.1** | 2004 | 10265 | 10244 | 3539 | 2103 | 2056 | 1990 |
| **9** | **GCA_015720195.1** | 2017 | 10281 | 10258 | 3550 | 2116 | 2071 | 2005 |
| **10** | **GCA_021441845.1** | 1475 | 10502 | 10503 | 774 | 1575 | 1497 | 1462 |
| **11** | **GCA_021920105.1** | 1430 | 10452 | 10454 | 732 | 1528 | 1462 | 1415 |
| **12** | **GCA_021920885.1** | 214 | 9714 | 9693 | 1929 | 312 | 268 | 199 |
| **13** | **GCA_021920985.1** | 219 | 9719 | 9698 | 1933 | 317 | 273 | 204 |
| **14** | **GCA_021925685.1** | 47 | 9724 | 9704 | 1944 | 187 | 249 | 30 |
| **15** | **GCA_021926845.1** | 45 | 9721 | 9701 | 1939 | 185 | 247 | 28 |
| **16** | **GCA_021928295.1** | 27 | 9706 | 9685 | 1924 | 167 | 231 | 12 |
| **17** | **GCA_021928995.1** | 59 | 9732 | 9709 | 1955 | 200 | 264 | 45 |
| **18** | **GCA_021929455.1** | 48 | 9732 | 9705 | 1942 | 194 | 255 | 37 |
| **19** | **GCA_021933415.1** | 9706 | 225 | 212 | 10582 | 9791 | 9739 | 9692 |
| **20** | **GCA_021956765.1** | 2107 | 10365 | 10343 | 3639 | 2206 | 2126 | 2093 |
| **21** | **GCA_021957705.1** | 1980 | 10245 | 10220 | 3516 | 2079 | 2032 | 1966 |
| **22** | **GCA_022048705.1** | 1451 | 10476 | 10477 | 753 | 1551 | 1507 | 1438 |
| **23** | **GCA_022061125.1** | 1981 | 10225 | 10202 | 3516 | 2080 | 2035 | 1969 |
| **24** | **GCA_022084535.1** | 1964 | 10230 | 10207 | 3501 | 2063 | 2018 | 1952 |
| **25** | **GCA_022176145.1** | 3224 | 10872 | 10850 | 4334 | 3320 | 3252 | 3207 |
| **26** | **GCA_022176185.1** | 3221 | 10872 | 10848 | 4332 | 3320 | 3252 | 3207 |
| **27** | **GCA_022176205.1** | 3228 | 10881 | 10854 | 4339 | 3327 | 3259 | 3214 |
| **28** | **GCA_022176585.1** | 3227 | 10878 | 10854 | 4338 | 3326 | 3258 | 3213 |
| **29** | **GCA_022176645.1** | 3224 | 10875 | 10851 | 4334 | 3323 | 3255 | 3210 |
| **30** | **GCA_022233245.1** | 1437 | 10461 | 10464 | 560 | 1537 | 1491 | 1422 |
| **31** | **GCA_022233305.1** | 1460 | 10481 | 10483 | 641 | 1560 | 1514 | 1445 |
| **32** | **GCA_022233405.1** | 9671 | 152 | 44 | 10544 | 9755 | 9702 | 9655 |
| **33** | **GCA_022250515.1** | 188 | 9682 | 9661 | 1907 | 285 | 242 | 173 |
| **34** | **GCA_022270255.1** | 99 | 9710 | 9690 | 1929 | 197 | 235 | 82 |
| **35** | **GCA_022270275.1** | 144 | 9753 | 9730 | 1973 | 242 | 278 | 125 |
| **36** | **GCA_022270495.1** | 122 | 9735 | 9714 | 1952 | 220 | 259 | 107 |
| **37** | **GCA_022270575.1** | 102 | 9715 | 9694 | 1933 | 200 | 240 | 87 |
| **38** | **GCA_022270615.1** | 104 | 9717 | 9694 | 1935 | 202 | 240 | 87 |
| **39** | **GCA_022270695.1** | 122 | 9733 | 9710 | 1950 | 220 | 256 | 103 |
| **40** | **GCA_024392555.1** | 1990 | 10256 | 10233 | 3525 | 2089 | 2044 | 1978 |
| **41** | **GCA_024474865.1** | 1450 | 10474 | 10475 | 748 | 1549 | 1506 | 1437 |
| **42** | **GCA_025101225.1** | 1443 | 10468 | 10470 | 604 | 1543 | 1499 | 1430 |
| **43** | **GCA_026361275.1** | 1486 | 10511 | 10513 | 785 | 1586 | 1518 | 1471 |
| **44** | **GCA_030786325.1** | 1490 | 10510 | 10509 | 792 | 1590 | 1522 | 1475 |
| **45** | **GCA_030820975.1** | 1977 | 10242 | 10217 | 3512 | 2076 | 2027 | 1961 |
| **46** | **GCA_032044555.1** | 129 | 9710 | 9690 | 1934 | 227 | 239 | 112 |
| **47** | **GCA_032046295.1** | 58 | 9736 | 9713 | 1950 | 198 | 258 | 39 |
| **48** | **GCA_032062785.1** | 29 | 9707 | 9687 | 1927 | 169 | 231 | 12 |
| **49** | **GCA_032066125.1** | 57 | 9732 | 9711 | 1955 | 197 | 261 | 42 |
| **50** | **GCA_032066145.1** | 33 | 9709 | 9691 | 1929 | 173 | 235 | 16 |
| **51** | **GCA_032070585.1** | 30 | 9708 | 9689 | 1927 | 170 | 234 | 15 |
| **52** | **GCA_032070965.1** | 32 | 9711 | 9690 | 1931 | 172 | 236 | 17 |
| **53** | **GCA_032072835.1** | 1424 | 10447 | 10449 | 725 | 1525 | 1457 | 1410 |
| **54** | **GCA_032077145.1** | 17 | 9707 | 9687 | 1930 | 173 | 235 | 16 |
| **55** | **GCA_032128025.1** | 10298 | 831 | 814 | 11162 | 10383 | 10329 | 10282 |
| **56** | **GCA_032129715.1** | 38 | 9708 | 9685 | 1934 | 178 | 240 | 21 |
| **57** | **GCA_032132495.1** | 56 | 9732 | 9713 | 1952 | 196 | 258 | 39 |
| **58** | **GCA_032132835.1** | 88 | 9755 | 9734 | 1957 | 228 | 291 | 73 |
| **59** | **GCA_032134135.1** | 1766 | 10762 | 10758 | 1059 | 1866 | 1818 | 1750 |
| **60** | **GCA_032134975.1** | 48 | 9725 | 9705 | 1943 | 188 | 250 | 31 |
| **61** | **GCA_032137635.1** | 96 | 9710 | 9689 | 1927 | 194 | 234 | 81 |
| **62** | **GCA_032153315.1** | 33 | 9713 | 9692 | 1932 | 173 | 237 | 18 |
| **63** | **GCA_032155885.1** | 100 | 9712 | 9691 | 1927 | 198 | 236 | 83 |
| **64** | **GCA_032411785.1** | 0 | 9715 | 9694 | 1935 | 178 | 242 | 23 |
| **65** | **GCA_033106885.1** | 9715 | 0 | 187 | 10564 | 9800 | 9750 | 9703 |
| **66** | **GCA_033107445.1** | 9694 | 187 | 0 | 10570 | 9778 | 9727 | 9680 |
| **67** | **GCA_033108425.1** | 1935 | 10564 | 10570 | 0 | 2033 | 1966 | 1920 |
| **68** | **GCA_033122545.1** | 178 | 9800 | 9778 | 2033 | 0 | 340 | 163 |
| **69** | **GCA_900181095.1** | 242 | 9750 | 9727 | 1966 | 340 | 0 | 223 |
| **70** | **GCA_900502575.1** | 23 | 9703 | 9680 | 1920 | 163 | 223 | 0 |
| **71** | **GCA_900503265.1** | 1978 | 10240 | 10215 | 3510 | 2077 | 1995 | 1962 |
| **72** | **GCA_900504655.1** | 3177 | 10837 | 10812 | 4287 | 3276 | 3206 | 3161 |
| **73** | **GCA_900504955.1** | 89 | 9699 | 9676 | 1920 | 187 | 223 | 70 |
| **74** | **GCA_900506745.1** | 1980 | 10243 | 10218 | 3515 | 2079 | 2031 | 1964 |
| **75** | **GCA_900512545.1** | 27 | 9705 | 9685 | 1925 | 167 | 229 | 10 |
| **76** | **GCF_024495065.1** | 1428 | 10453 | 10455 | 728 | 1525 | 1482 | 1413 |
| **77** | **GCF_024495515.1** | 1429 | 10456 | 10457 | 729 | 1528 | 1485 | 1416 |
| **78** | **SAMEA113605448** | 1432 | 10433 | 10435 | 732 | 1531 | 1465 | 1418 |
| **79** | **SAMEA113605746** | 365 | 9775 | 9752 | 2191 | 408 | 521 | 349 |
| **80** | **SAMEA2052930** | 99 | 9714 | 9690 | 1927 | 198 | 234 | 81 |
| **81** | **SAMEA2633723** | 9677 | 155 | 142 | 10556 | 9762 | 9712 | 9663 |
| **82** | **SAMEA3281566** | 1446 | 10466 | 10468 | 676 | 1546 | 1499 | 1431 |
| **83** | **SAMEA5758680** | 90 | 9695 | 9675 | 1921 | 188 | 226 | 73 |
| **84** | **SAMEA6155812** | 3226 | 10883 | 10858 | 4337 | 3325 | 3258 | 3210 |
| **85** | **SAMEA6155829** | 3223 | 10878 | 10856 | 4335 | 3322 | 3257 | 3209 |
| **86** | **SAMEA6155886** | 3226 | 10883 | 10858 | 4337 | 3325 | 3258 | 3210 |
| **87** | **SAMEA6156048** | 3223 | 10878 | 10856 | 4335 | 3322 | 3257 | 3209 |
| **88** | **SAMEA6375606** | 2046 | 10307 | 10285 | 3578 | 2145 | 2065 | 2032 |
| **89** | **SAMEA6635864** | 3223 | 10878 | 10856 | 4335 | 3322 | 3257 | 3209 |
| **90** | **SAMEA6654214** | 3224 | 10863 | 10838 | 4335 | 3323 | 3255 | 3210 |
| **91** | **SAMEA6654216** | 3226 | 10877 | 10853 | 4337 | 3325 | 3257 | 3212 |
| **92** | **SAMEA6654217** | 3247 | 10891 | 10866 | 4356 | 3347 | 3279 | 3234 |
| **93** | **SAMEA6654218** | 3235 | 10887 | 10861 | 4347 | 3334 | 3268 | 3223 |
| **94** | **SAMEA7472332** | 226 | 9754 | 9733 | 1972 | 324 | 166 | 211 |
| **95** | **SAMEA7472348** | 1516 | 10507 | 10504 | 810 | 1614 | 1544 | 1497 |
| **96** | **SAMN16197932** | 2005 | 10266 | 10245 | 3540 | 2104 | 2057 | 1991 |
| **97** | **SAMN16197933** | 2007 | 10265 | 10244 | 3542 | 2106 | 2059 | 1993 |
| **98** | **SAMN16197935** | 2004 | 10265 | 10244 | 3539 | 2103 | 2056 | 1990 |
| **99** | **SAMN17981712** | 1425 | 10444 | 10445 | 726 | 1525 | 1479 | 1410 |

| **snp-dists 0.8.2** | | **71** | **72** | **73** | **74** | **75** | **76** | **77** |
| --- | --- | --- | --- | --- | --- | --- | --- | --- |
| **GCA_900503265.1** | **GCA_900504655.1** | **GCA_900504955.1** | **GCA_900506745.1** | **GCA_900512545.1** | **GCF_024495065.1** | **GCF_024495515.1** |
| **1** | **A1** | 3113 | 3921 | 1432 | 3115 | 1438 | 49 | 50 |
| **2** | **GCA_002186705.1** | 3103 | 3889 | 1422 | 3105 | 1426 | 171 | 172 |
| **3** | **GCA_002186945.1** | 3103 | 3889 | 1422 | 3105 | 1426 | 171 | 172 |
| **4** | **GCA_002187375.1** | 1415 | 82 | 3205 | 1401 | 3212 | 3949 | 3951 |
| **5** | **GCA_002187715.1** | 3198 | 3982 | 1517 | 3200 | 1521 | 266 | 267 |
| **6** | **GCA_002188235.1** | 3188 | 3972 | 1507 | 3190 | 1511 | 256 | 257 |
| **7** | **GCA_003195295.1** | 3515 | 4249 | 1844 | 3514 | 1849 | 630 | 631 |
| **8** | **GCA_014788765.1** | 151 | 1394 | 1988 | 106 | 1996 | 3121 | 3123 |
| **9** | **GCA_015720195.1** | 167 | 1408 | 2003 | 121 | 2009 | 3131 | 3133 |
| **10** | **GCA_021441845.1** | 3109 | 3951 | 1462 | 3145 | 1466 | 102 | 103 |
| **11** | **GCA_021920105.1** | 3097 | 3883 | 1415 | 3099 | 1419 | 166 | 167 |
| **12** | **GCA_021920885.1** | 1977 | 3176 | 199 | 1979 | 203 | 1424 | 1427 |
| **13** | **GCA_021920985.1** | 1982 | 3181 | 204 | 1984 | 208 | 1429 | 1432 |
| **14** | **GCA_021925685.1** | 1986 | 3184 | 96 | 1988 | 36 | 1437 | 1439 |
| **15** | **GCA_021926845.1** | 1983 | 3181 | 94 | 1985 | 34 | 1435 | 1436 |
| **16** | **GCA_021928295.1** | 1970 | 3169 | 78 | 1972 | 16 | 1417 | 1420 |
| **17** | **GCA_021928995.1** | 1995 | 3194 | 111 | 1997 | 49 | 1449 | 1450 |
| **18** | **GCA_021929455.1** | 1992 | 3190 | 103 | 1994 | 43 | 1438 | 1445 |
| **19** | **GCA_021933415.1** | 10228 | 10824 | 9688 | 10231 | 9698 | 10469 | 10472 |
| **20** | **GCA_021956765.1** | 191 | 1499 | 2091 | 243 | 2099 | 3224 | 3226 |
| **21** | **GCA_021957705.1** | 128 | 1371 | 1964 | 82 | 1971 | 3097 | 3099 |
| **22** | **GCA_022048705.1** | 3118 | 3927 | 1438 | 3121 | 1442 | 187 | 188 |
| **23** | **GCA_022061125.1** | 131 | 1372 | 1967 | 71 | 1973 | 3098 | 3100 |
| **24** | **GCA_022084535.1** | 114 | 1357 | 1950 | 68 | 1956 | 3081 | 3083 |
| **25** | **GCA_022176145.1** | 1418 | 86 | 3205 | 1418 | 3213 | 3950 | 3951 |
| **26** | **GCA_022176185.1** | 1415 | 83 | 3205 | 1415 | 3213 | 3947 | 3949 |
| **27** | **GCA_022176205.1** | 1422 | 89 | 3212 | 1422 | 3218 | 3954 | 3956 |
| **28** | **GCA_022176585.1** | 1421 | 89 | 3211 | 1421 | 3219 | 3953 | 3955 |
| **29** | **GCA_022176645.1** | 1418 | 86 | 3208 | 1418 | 3216 | 3950 | 3952 |
| **30** | **GCA_022233245.1** | 3103 | 3910 | 1422 | 3105 | 1428 | 171 | 172 |
| **31** | **GCA_022233305.1** | 3126 | 3933 | 1445 | 3128 | 1451 | 194 | 195 |
| **32** | **GCA_022233405.1** | 10192 | 10789 | 9651 | 10195 | 9660 | 10432 | 10435 |
| **33** | **GCA_022250515.1** | 1951 | 3150 | 173 | 1953 | 177 | 1398 | 1401 |
| **34** | **GCA_022270255.1** | 1974 | 3172 | 72 | 1976 | 88 | 1423 | 1426 |
| **35** | **GCA_022270275.1** | 2017 | 3216 | 115 | 2019 | 131 | 1468 | 1471 |
| **36** | **GCA_022270495.1** | 1999 | 3198 | 97 | 2001 | 111 | 1446 | 1449 |
| **37** | **GCA_022270575.1** | 1976 | 3175 | 77 | 1978 | 91 | 1426 | 1427 |
| **38** | **GCA_022270615.1** | 1979 | 3178 | 77 | 1981 | 92 | 1428 | 1431 |
| **39** | **GCA_022270695.1** | 1995 | 3194 | 93 | 1997 | 109 | 1446 | 1449 |
| **40** | **GCA_024392555.1** | 140 | 1383 | 1976 | 94 | 1982 | 3107 | 3109 |
| **41** | **GCA_024474865.1** | 3118 | 3926 | 1437 | 3120 | 1441 | 184 | 185 |
| **42** | **GCA_025101225.1** | 3111 | 3919 | 1430 | 3113 | 1434 | 177 | 178 |
| **43** | **GCA_026361275.1** | 3152 | 3938 | 1471 | 3154 | 1475 | 222 | 223 |
| **44** | **GCA_030786325.1** | 3152 | 3937 | 1475 | 3154 | 1480 | 226 | 227 |
| **45** | **GCA_030820975.1** | 123 | 1366 | 1959 | 77 | 1967 | 3094 | 3096 |
| **46** | **GCA_032044555.1** | 1978 | 3175 | 112 | 1980 | 118 | 1427 | 1430 |
| **47** | **GCA_032046295.1** | 1991 | 3190 | 105 | 1993 | 45 | 1448 | 1449 |
| **48** | **GCA_032062785.1** | 1970 | 3168 | 78 | 1972 | 18 | 1419 | 1422 |
| **49** | **GCA_032066125.1** | 2000 | 3199 | 108 | 2002 | 46 | 1445 | 1448 |
| **50** | **GCA_032066145.1** | 1974 | 3170 | 82 | 1976 | 22 | 1423 | 1426 |
| **51** | **GCA_032070585.1** | 1970 | 3169 | 81 | 1971 | 18 | 1420 | 1421 |
| **52** | **GCA_032070965.1** | 1975 | 3174 | 83 | 1977 | 21 | 1422 | 1425 |
| **53** | **GCA_032072835.1** | 3089 | 3874 | 1410 | 3091 | 1416 | 161 | 162 |
| **54** | **GCA_032077145.1** | 1971 | 3169 | 82 | 1973 | 22 | 1423 | 1424 |
| **55** | **GCA_032128025.1** | 10818 | 11410 | 10278 | 10821 | 10288 | 11053 | 11056 |
| **56** | **GCA_032129715.1** | 1976 | 3175 | 87 | 1978 | 26 | 1427 | 1428 |
| **57** | **GCA_032132495.1** | 1997 | 3195 | 105 | 1998 | 45 | 1446 | 1449 |
| **58** | **GCA_032132835.1** | 2031 | 3230 | 139 | 2033 | 77 | 1451 | 1454 |
| **59** | **GCA_032134135.1** | 3428 | 4233 | 1750 | 3430 | 1756 | 508 | 509 |
| **60** | **GCA_032134975.1** | 1986 | 3184 | 97 | 1988 | 37 | 1437 | 1438 |
| **61** | **GCA_032137635.1** | 1973 | 3172 | 69 | 1975 | 85 | 1419 | 1423 |
| **62** | **GCA_032153315.1** | 1976 | 3175 | 84 | 1978 | 22 | 1423 | 1426 |
| **63** | **GCA_032155885.1** | 1971 | 3169 | 73 | 1973 | 89 | 1420 | 1423 |
| **64** | **GCA_032411785.1** | 1978 | 3177 | 89 | 1980 | 27 | 1428 | 1429 |
| **65** | **GCA_033106885.1** | 10240 | 10837 | 9699 | 10243 | 9705 | 10453 | 10456 |
| **66** | **GCA_033107445.1** | 10215 | 10812 | 9676 | 10218 | 9685 | 10455 | 10457 |
| **67** | **GCA_033108425.1** | 3510 | 4287 | 1920 | 3515 | 1925 | 728 | 729 |
| **68** | **GCA_033122545.1** | 2077 | 3276 | 187 | 2079 | 167 | 1525 | 1528 |
| **69** | **GCA_900181095.1** | 1995 | 3206 | 223 | 2031 | 229 | 1482 | 1485 |
| **70** | **GCA_900502575.1** | 1962 | 3161 | 70 | 1964 | 10 | 1413 | 1416 |
| **71** | **GCA_900503265.1** | 0 | 1369 | 1960 | 126 | 1968 | 3095 | 3097 |
| **72** | **GCA_900504655.1** | 1369 | 0 | 3159 | 1369 | 3166 | 3903 | 3905 |
| **73** | **GCA_900504955.1** | 1960 | 3159 | 0 | 1962 | 76 | 1413 | 1416 |
| **74** | **GCA_900506745.1** | 126 | 1369 | 1962 | 0 | 1970 | 3097 | 3099 |
| **75** | **GCA_900512545.1** | 1968 | 3166 | 76 | 1970 | 0 | 1417 | 1420 |
| **76** | **GCF_024495065.1** | 3095 | 3903 | 1413 | 3097 | 1417 | 0 | 1 |
| **77** | **GCF_024495515.1** | 3097 | 3905 | 1416 | 3099 | 1420 | 1 | 0 |
| **78** | **SAMEA113605448** | 3092 | 3878 | 1418 | 3090 | 1422 | 169 | 170 |
| **79** | **SAMEA113605746** | 2193 | 3372 | 373 | 2196 | 355 | 1698 | 1700 |
| **80** | **SAMEA2052930** | 1972 | 3171 | 69 | 1974 | 87 | 1421 | 1425 |
| **81** | **SAMEA2633723** | 10200 | 10797 | 9659 | 10204 | 9669 | 10441 | 10444 |
| **82** | **SAMEA3281566** | 3109 | 3916 | 1431 | 3111 | 1437 | 181 | 182 |
| **83** | **SAMEA5758680** | 1965 | 3163 | 63 | 1967 | 79 | 1414 | 1417 |
| **84** | **SAMEA6155812** | 1421 | 88 | 3211 | 1407 | 3215 | 3955 | 3957 |
| **85** | **SAMEA6155829** | 1420 | 88 | 3210 | 1406 | 3215 | 3952 | 3954 |
| **86** | **SAMEA6155886** | 1421 | 88 | 3211 | 1407 | 3215 | 3955 | 3957 |
| **87** | **SAMEA6156048** | 1420 | 88 | 3210 | 1406 | 3215 | 3952 | 3954 |
| **88** | **SAMEA6375606** | 130 | 1438 | 2030 | 182 | 2038 | 3163 | 3165 |
| **89** | **SAMEA6635864** | 1420 | 88 | 3210 | 1406 | 3215 | 3952 | 3954 |
| **90** | **SAMEA6654214** | 1418 | 86 | 3208 | 1418 | 3216 | 3950 | 3952 |
| **91** | **SAMEA6654216** | 1420 | 88 | 3210 | 1420 | 3218 | 3952 | 3954 |
| **92** | **SAMEA6654217** | 1444 | 112 | 3232 | 1444 | 3240 | 3976 | 3978 |
| **93** | **SAMEA6654218** | 1431 | 98 | 3221 | 1431 | 3226 | 3961 | 3963 |
| **94** | **SAMEA7472332** | 2014 | 3191 | 211 | 2016 | 215 | 1466 | 1467 |
| **95** | **SAMEA7472348** | 3175 | 3959 | 1497 | 3177 | 1502 | 255 | 257 |
| **96** | **SAMN16197932** | 152 | 1395 | 1989 | 107 | 1997 | 3122 | 3124 |
| **97** | **SAMN16197933** | 154 | 1397 | 1991 | 109 | 1999 | 3124 | 3126 |
| **98** | **SAMN16197935** | 151 | 1394 | 1988 | 106 | 1996 | 3121 | 3123 |
| **99** | **SAMN17981712** | 3091 | 3898 | 1410 | 3089 | 1416 | 161 | 162 |

| **snp-dists 0.8.2** | | **78** | **79** | **80** | **81** | **82** | **83** | **84** |
| --- | --- | --- | --- | --- | --- | --- | --- | --- |
| **SAMEA113605448** | **SAMEA113605746** | **SAMEA2052930** | **SAMEA2633723** | **SAMEA3281566** | **SAMEA5758680** | **SAMEA6155812** |
| **1** | **A1** | 190 | 1718 | 1441 | 10460 | 200 | 1435 | 3970 |
| **2** | **GCA_002186705.1** | 110 | 1708 | 1431 | 10442 | 190 | 1423 | 3941 |
| **3** | **GCA_002186945.1** | 110 | 1707 | 1431 | 10440 | 190 | 1423 | 3941 |
| **4** | **GCA_002187375.1** | 3924 | 3420 | 3217 | 10830 | 3962 | 3209 | 34 |
| **5** | **GCA_002187715.1** | 205 | 1803 | 1526 | 10541 | 285 | 1518 | 4034 |
| **6** | **GCA_002188235.1** | 195 | 1792 | 1516 | 10533 | 275 | 1508 | 4024 |
| **7** | **GCA_003195295.1** | 564 | 2121 | 1852 | 10663 | 647 | 1847 | 4295 |
| **8** | **GCA_014788765.1** | 3118 | 2222 | 2000 | 10231 | 3137 | 1992 | 1446 |
| **9** | **GCA_015720195.1** | 3128 | 2235 | 2015 | 10244 | 3146 | 2005 | 1460 |
| **10** | **GCA_021441845.1** | 217 | 1746 | 1471 | 10490 | 229 | 1463 | 4003 |
| **11** | **GCA_021920105.1** | 101 | 1702 | 1423 | 10440 | 185 | 1416 | 3935 |
| **12** | **GCA_021920885.1** | 1429 | 499 | 210 | 9677 | 1444 | 200 | 3225 |
| **13** | **GCA_021920985.1** | 1434 | 503 | 215 | 9682 | 1449 | 205 | 3230 |
| **14** | **GCA_021925685.1** | 1442 | 373 | 106 | 9688 | 1456 | 99 | 3236 |
| **15** | **GCA_021926845.1** | 1439 | 371 | 104 | 9685 | 1453 | 97 | 3229 |
| **16** | **GCA_021928295.1** | 1422 | 354 | 89 | 9668 | 1437 | 79 | 3218 |
| **17** | **GCA_021928995.1** | 1455 | 387 | 121 | 9694 | 1468 | 112 | 3242 |
| **18** | **GCA_021929455.1** | 1443 | 375 | 113 | 9696 | 1462 | 106 | 3242 |
| **19** | **GCA_021933415.1** | 10449 | 9763 | 9703 | 182 | 10484 | 9688 | 10870 |
| **20** | **GCA_021956765.1** | 3217 | 2322 | 2103 | 10329 | 3240 | 2096 | 1529 |
| **21** | **GCA_021957705.1** | 3094 | 2197 | 1976 | 10207 | 3112 | 1967 | 1423 |
| **22** | **GCA_022048705.1** | 148 | 1724 | 1447 | 10464 | 206 | 1439 | 3979 |
| **23** | **GCA_022061125.1** | 3095 | 2199 | 1979 | 10189 | 3114 | 1969 | 1398 |
| **24** | **GCA_022084535.1** | 3078 | 2182 | 1962 | 10193 | 3097 | 1952 | 1409 |
| **25** | **GCA_022176145.1** | 3924 | 3422 | 3216 | 10837 | 3965 | 3210 | 54 |
| **26** | **GCA_022176185.1** | 3921 | 3420 | 3217 | 10837 | 3963 | 3210 | 51 |
| **27** | **GCA_022176205.1** | 3928 | 3425 | 3224 | 10842 | 3968 | 3215 | 57 |
| **28** | **GCA_022176585.1** | 3927 | 3425 | 3223 | 10843 | 3969 | 3216 | 57 |
| **29** | **GCA_022176645.1** | 3924 | 3423 | 3220 | 10840 | 3966 | 3213 | 54 |
| **30** | **GCA_022233245.1** | 178 | 1708 | 1431 | 10452 | 120 | 1425 | 3962 |
| **31** | **GCA_022233305.1** | 201 | 1732 | 1454 | 10471 | 143 | 1448 | 3981 |
| **32** | **GCA_022233405.1** | 10412 | 9731 | 9666 | 104 | 10444 | 9650 | 10835 |
| **33** | **GCA_022250515.1** | 1403 | 471 | 184 | 9645 | 1418 | 174 | 3202 |
| **34** | **GCA_022270255.1** | 1428 | 384 | 83 | 9674 | 1443 | 75 | 3224 |
| **35** | **GCA_022270275.1** | 1473 | 427 | 126 | 9713 | 1486 | 118 | 3265 |
| **36** | **GCA_022270495.1** | 1451 | 406 | 108 | 9697 | 1466 | 98 | 3247 |
| **37** | **GCA_022270575.1** | 1431 | 388 | 87 | 9677 | 1444 | 78 | 3227 |
| **38** | **GCA_022270615.1** | 1433 | 388 | 88 | 9678 | 1447 | 79 | 3230 |
| **39** | **GCA_022270695.1** | 1451 | 405 | 104 | 9694 | 1464 | 96 | 3243 |
| **40** | **GCA_024392555.1** | 3104 | 2208 | 1988 | 10219 | 3123 | 1978 | 1435 |
| **41** | **GCA_024474865.1** | 191 | 1721 | 1446 | 10462 | 203 | 1438 | 3978 |
| **42** | **GCA_025101225.1** | 184 | 1713 | 1439 | 10457 | 126 | 1431 | 3967 |
| **43** | **GCA_026361275.1** | 161 | 1756 | 1480 | 10498 | 239 | 1472 | 3990 |
| **44** | **GCA_030786325.1** | 165 | 1760 | 1484 | 10496 | 244 | 1477 | 3982 |
| **45** | **GCA_030820975.1** | 3091 | 2193 | 1971 | 10203 | 3108 | 1963 | 1418 |
| **46** | **GCA_032044555.1** | 1432 | 412 | 123 | 9675 | 1447 | 115 | 3224 |
| **47** | **GCA_032046295.1** | 1453 | 383 | 115 | 9696 | 1464 | 108 | 3239 |
| **48** | **GCA_032062785.1** | 1424 | 357 | 89 | 9671 | 1439 | 81 | 3217 |
| **49** | **GCA_032066125.1** | 1452 | 384 | 119 | 9694 | 1467 | 108 | 3248 |
| **50** | **GCA_032066145.1** | 1428 | 361 | 93 | 9675 | 1443 | 85 | 3219 |
| **51** | **GCA_032070585.1** | 1425 | 356 | 91 | 9671 | 1437 | 81 | 3220 |
| **52** | **GCA_032070965.1** | 1427 | 359 | 94 | 9673 | 1442 | 84 | 3223 |
| **53** | **GCA_032072835.1** | 6 | 1697 | 1419 | 10437 | 180 | 1413 | 3926 |
| **54** | **GCA_032077145.1** | 1427 | 361 | 92 | 9671 | 1441 | 85 | 3218 |
| **55** | **GCA_032128025.1** | 11033 | 10355 | 10293 | 784 | 11066 | 10278 | 11455 |
| **56** | **GCA_032129715.1** | 1433 | 364 | 97 | 9669 | 1445 | 89 | 3227 |
| **57** | **GCA_032132495.1** | 1451 | 383 | 116 | 9697 | 1466 | 108 | 3245 |
| **58** | **GCA_032132835.1** | 1456 | 413 | 150 | 9717 | 1471 | 140 | 3279 |
| **59** | **GCA_032134135.1** | 515 | 2033 | 1759 | 10748 | 525 | 1753 | 4282 |
| **60** | **GCA_032134975.1** | 1443 | 376 | 107 | 9690 | 1456 | 100 | 3233 |
| **61** | **GCA_032137635.1** | 1424 | 382 | 80 | 9672 | 1440 | 72 | 3224 |
| **62** | **GCA_032153315.1** | 1428 | 361 | 95 | 9675 | 1443 | 85 | 3224 |
| **63** | **GCA_032155885.1** | 1425 | 386 | 84 | 9675 | 1440 | 72 | 3221 |
| **64** | **GCA_032411785.1** | 1432 | 365 | 99 | 9677 | 1446 | 90 | 3226 |
| **65** | **GCA_033106885.1** | 10433 | 9775 | 9714 | 155 | 10466 | 9695 | 10883 |
| **66** | **GCA_033107445.1** | 10435 | 9752 | 9690 | 142 | 10468 | 9675 | 10858 |
| **67** | **GCA_033108425.1** | 732 | 2191 | 1927 | 10556 | 676 | 1921 | 4337 |
| **68** | **GCA_033122545.1** | 1531 | 408 | 198 | 9762 | 1546 | 188 | 3325 |
| **69** | **GCA_900181095.1** | 1465 | 521 | 234 | 9712 | 1499 | 226 | 3258 |
| **70** | **GCA_900502575.1** | 1418 | 349 | 81 | 9663 | 1431 | 73 | 3210 |
| **71** | **GCA_900503265.1** | 3092 | 2193 | 1972 | 10200 | 3109 | 1965 | 1421 |
| **72** | **GCA_900504655.1** | 3878 | 3372 | 3171 | 10797 | 3916 | 3163 | 88 |
| **73** | **GCA_900504955.1** | 1418 | 373 | 69 | 9659 | 1431 | 63 | 3211 |
| **74** | **GCA_900506745.1** | 3090 | 2196 | 1974 | 10204 | 3111 | 1967 | 1407 |
| **75** | **GCA_900512545.1** | 1422 | 355 | 87 | 9669 | 1437 | 79 | 3215 |
| **76** | **GCF_024495065.1** | 169 | 1698 | 1421 | 10441 | 181 | 1414 | 3955 |
| **77** | **GCF_024495515.1** | 170 | 1700 | 1425 | 10444 | 182 | 1417 | 3957 |
| **78** | **SAMEA113605448** | 0 | 1704 | 1426 | 10421 | 188 | 1419 | 3930 |
| **79** | **SAMEA113605746** | 1704 | 0 | 383 | 9739 | 1715 | 376 | 3423 |
| **80** | **SAMEA2052930** | 1426 | 383 | 0 | 9674 | 1440 | 74 | 3220 |
| **81** | **SAMEA2633723** | 10421 | 9739 | 9674 | 0 | 10456 | 9659 | 10843 |
| **82** | **SAMEA3281566** | 188 | 1715 | 1440 | 10456 | 0 | 1434 | 3968 |
| **83** | **SAMEA5758680** | 1419 | 376 | 74 | 9659 | 1434 | 0 | 3215 |
| **84** | **SAMEA6155812** | 3930 | 3423 | 3220 | 10843 | 3968 | 3215 | 0 |
| **85** | **SAMEA6155829** | 3927 | 3422 | 3219 | 10843 | 3968 | 3215 | 0 |
| **86** | **SAMEA6155886** | 3930 | 3423 | 3220 | 10843 | 3968 | 3215 | 0 |
| **87** | **SAMEA6156048** | 3927 | 3422 | 3219 | 10843 | 3968 | 3215 | 0 |
| **88** | **SAMEA6375606** | 3160 | 2261 | 2042 | 10271 | 3179 | 2035 | 1468 |
| **89** | **SAMEA6635864** | 3927 | 3422 | 3219 | 10843 | 3968 | 3215 | 0 |
| **90** | **SAMEA6654214** | 3924 | 3422 | 3220 | 10828 | 3965 | 3213 | 54 |
| **91** | **SAMEA6654216** | 3926 | 3425 | 3222 | 10842 | 3968 | 3215 | 56 |
| **92** | **SAMEA6654217** | 3950 | 3446 | 3244 | 10856 | 3992 | 3237 | 77 |
| **93** | **SAMEA6654218** | 3935 | 3433 | 3233 | 10849 | 3976 | 3223 | 66 |
| **94** | **SAMEA7472332** | 1449 | 508 | 221 | 9718 | 1483 | 212 | 3243 |
| **95** | **SAMEA7472348** | 194 | 1781 | 1505 | 10492 | 271 | 1499 | 4011 |
| **96** | **SAMN16197932** | 3119 | 2223 | 2001 | 10232 | 3138 | 1993 | 1447 |
| **97** | **SAMN16197933** | 3121 | 2225 | 2003 | 10231 | 3140 | 1995 | 1449 |
| **98** | **SAMN16197935** | 3118 | 2222 | 2000 | 10231 | 3137 | 1992 | 1446 |
| **99** | **SAMN17981712** | 114 | 1695 | 1419 | 10434 | 180 | 1413 | 3949 |

| **snp-dists 0.8.2** | | **85** | **86** | **87** | **88** | **89** | **90** | **91** |
| --- | --- | --- | --- | --- | --- | --- | --- | --- |
| **SAMEA6155829** | **SAMEA6155886** | **SAMEA6156048** | **SAMEA6375606** | **SAMEA6635864** | **SAMEA6654214** | **SAMEA6654216** |
| **1** | **A1** | 3969 | 3970 | 3969 | 3183 | 3969 | 3969 | 3971 |
| **2** | **GCA_002186705.1** | 3938 | 3941 | 3938 | 3171 | 3938 | 3934 | 3936 |
| **3** | **GCA_002186945.1** | 3938 | 3941 | 3938 | 3171 | 3938 | 3936 | 3938 |
| **4** | **GCA_002187375.1** | 34 | 34 | 34 | 1462 | 34 | 54 | 56 |
| **5** | **GCA_002187715.1** | 4031 | 4034 | 4031 | 3266 | 4031 | 4029 | 4031 |
| **6** | **GCA_002188235.1** | 4021 | 4024 | 4021 | 3256 | 4021 | 4019 | 4021 |
| **7** | **GCA_003195295.1** | 4295 | 4295 | 4295 | 3584 | 4295 | 4294 | 4296 |
| **8** | **GCA_014788765.1** | 1446 | 1446 | 1446 | 222 | 1446 | 1444 | 1446 |
| **9** | **GCA_015720195.1** | 1457 | 1460 | 1457 | 235 | 1457 | 1461 | 1457 |
| **10** | **GCA_021441845.1** | 4000 | 4003 | 4000 | 3177 | 4000 | 3997 | 4000 |
| **11** | **GCA_021920105.1** | 3932 | 3935 | 3932 | 3165 | 3932 | 3929 | 3932 |
| **12** | **GCA_021920885.1** | 3222 | 3225 | 3222 | 2039 | 3222 | 3223 | 3225 |
| **13** | **GCA_021920985.1** | 3227 | 3230 | 3227 | 2044 | 3227 | 3228 | 3230 |
| **14** | **GCA_021925685.1** | 3236 | 3236 | 3236 | 2056 | 3236 | 3234 | 3236 |
| **15** | **GCA_021926845.1** | 3229 | 3229 | 3229 | 2053 | 3229 | 3229 | 3232 |
| **16** | **GCA_021928295.1** | 3215 | 3218 | 3215 | 2038 | 3215 | 3216 | 3218 |
| **17** | **GCA_021928995.1** | 3239 | 3242 | 3239 | 2062 | 3239 | 3240 | 3242 |
| **18** | **GCA_021929455.1** | 3242 | 3242 | 3242 | 2062 | 3242 | 3240 | 3242 |
| **19** | **GCA_021933415.1** | 10870 | 10870 | 10870 | 10299 | 10870 | 10854 | 10868 |
| **20** | **GCA_021956765.1** | 1529 | 1529 | 1529 | 69 | 1529 | 1549 | 1551 |
| **21** | **GCA_021957705.1** | 1421 | 1423 | 1421 | 197 | 1421 | 1419 | 1421 |
| **22** | **GCA_022048705.1** | 3976 | 3979 | 3976 | 3186 | 3976 | 3974 | 3976 |
| **23** | **GCA_022061125.1** | 1395 | 1398 | 1395 | 177 | 1395 | 1415 | 1417 |
| **24** | **GCA_022084535.1** | 1406 | 1409 | 1406 | 182 | 1406 | 1404 | 1406 |
| **25** | **GCA_022176145.1** | 54 | 54 | 54 | 1488 | 54 | 2 | 4 |
| **26** | **GCA_022176185.1** | 51 | 51 | 51 | 1485 | 51 | 7 | 7 |
| **27** | **GCA_022176205.1** | 56 | 57 | 56 | 1490 | 56 | 4 | 6 |
| **28** | **GCA_022176585.1** | 57 | 57 | 57 | 1491 | 57 | 5 | 7 |
| **29** | **GCA_022176645.1** | 54 | 54 | 54 | 1488 | 54 | 2 | 4 |
| **30** | **GCA_022233245.1** | 3962 | 3962 | 3962 | 3173 | 3962 | 3960 | 3962 |
| **31** | **GCA_022233305.1** | 3981 | 3981 | 3981 | 3196 | 3981 | 3979 | 3981 |
| **32** | **GCA_022233405.1** | 10833 | 10835 | 10833 | 10262 | 10833 | 10816 | 10830 |
| **33** | **GCA_022250515.1** | 3199 | 3202 | 3199 | 2019 | 3199 | 3197 | 3199 |
| **34** | **GCA_022270255.1** | 3224 | 3224 | 3224 | 2044 | 3224 | 3221 | 3224 |
| **35** | **GCA_022270275.1** | 3264 | 3265 | 3264 | 2087 | 3264 | 3264 | 3267 |
| **36** | **GCA_022270495.1** | 3244 | 3247 | 3244 | 2067 | 3244 | 3244 | 3247 |
| **37** | **GCA_022270575.1** | 3224 | 3227 | 3224 | 2044 | 3224 | 3221 | 3224 |
| **38** | **GCA_022270615.1** | 3228 | 3230 | 3228 | 2048 | 3228 | 3225 | 3228 |
| **39** | **GCA_022270695.1** | 3242 | 3243 | 3242 | 2065 | 3242 | 3242 | 3245 |
| **40** | **GCA_024392555.1** | 1432 | 1435 | 1432 | 208 | 1432 | 1430 | 1432 |
| **41** | **GCA_024474865.1** | 3975 | 3978 | 3975 | 3186 | 3975 | 3972 | 3975 |
| **42** | **GCA_025101225.1** | 3964 | 3967 | 3964 | 3179 | 3964 | 3962 | 3964 |
| **43** | **GCA_026361275.1** | 3987 | 3990 | 3987 | 3220 | 3987 | 3985 | 3987 |
| **44** | **GCA_030786325.1** | 3980 | 3982 | 3980 | 3221 | 3980 | 3981 | 3983 |
| **45** | **GCA_030820975.1** | 1417 | 1418 | 1417 | 193 | 1417 | 1415 | 1417 |
| **46** | **GCA_032044555.1** | 3224 | 3224 | 3224 | 2048 | 3224 | 3224 | 3226 |
| **47** | **GCA_032046295.1** | 3238 | 3239 | 3238 | 2061 | 3238 | 3239 | 3241 |
| **48** | **GCA_032062785.1** | 3217 | 3217 | 3217 | 2040 | 3217 | 3218 | 3220 |
| **49** | **GCA_032066125.1** | 3245 | 3248 | 3245 | 2068 | 3245 | 3246 | 3248 |
| **50** | **GCA_032066145.1** | 3219 | 3219 | 3219 | 2044 | 3219 | 3220 | 3222 |
| **51** | **GCA_032070585.1** | 3216 | 3220 | 3216 | 2036 | 3216 | 3215 | 3217 |
| **52** | **GCA_032070965.1** | 3220 | 3223 | 3220 | 2043 | 3220 | 3221 | 3223 |
| **53** | **GCA_032072835.1** | 3926 | 3926 | 3926 | 3159 | 3926 | 3924 | 3926 |
| **54** | **GCA_032077145.1** | 3218 | 3218 | 3218 | 2041 | 3218 | 3219 | 3221 |
| **55** | **GCA_032128025.1** | 11454 | 11455 | 11454 | 10888 | 11454 | 11438 | 11452 |
| **56** | **GCA_032129715.1** | 3225 | 3227 | 3225 | 2045 | 3225 | 3223 | 3225 |
| **57** | **GCA_032132495.1** | 3244 | 3244 | 3244 | 2067 | 3244 | 3245 | 3247 |
| **58** | **GCA_032132835.1** | 3276 | 3279 | 3276 | 2099 | 3276 | 3277 | 3279 |
| **59** | **GCA_032134135.1** | 4281 | 4282 | 4281 | 3498 | 4281 | 4282 | 4284 |
| **60** | **GCA_032134975.1** | 3233 | 3233 | 3233 | 2056 | 3233 | 3234 | 3236 |
| **61** | **GCA_032137635.1** | 3221 | 3224 | 3221 | 2041 | 3221 | 3219 | 3221 |
| **62** | **GCA_032153315.1** | 3221 | 3224 | 3221 | 2044 | 3221 | 3222 | 3224 |
| **63** | **GCA_032155885.1** | 3221 | 3221 | 3221 | 2041 | 3221 | 3219 | 3221 |
| **64** | **GCA_032411785.1** | 3223 | 3226 | 3223 | 2046 | 3223 | 3224 | 3226 |
| **65** | **GCA_033106885.1** | 10878 | 10883 | 10878 | 10307 | 10878 | 10863 | 10877 |
| **66** | **GCA_033107445.1** | 10856 | 10858 | 10856 | 10285 | 10856 | 10838 | 10853 |
| **67** | **GCA_033108425.1** | 4335 | 4337 | 4335 | 3578 | 4335 | 4335 | 4337 |
| **68** | **GCA_033122545.1** | 3322 | 3325 | 3322 | 2145 | 3322 | 3323 | 3325 |
| **69** | **GCA_900181095.1** | 3257 | 3258 | 3257 | 2065 | 3257 | 3255 | 3257 |
| **70** | **GCA_900502575.1** | 3209 | 3210 | 3209 | 2032 | 3209 | 3210 | 3212 |
| **71** | **GCA_900503265.1** | 1420 | 1421 | 1420 | 130 | 1420 | 1418 | 1420 |
| **72** | **GCA_900504655.1** | 88 | 88 | 88 | 1438 | 88 | 86 | 88 |
| **73** | **GCA_900504955.1** | 3210 | 3211 | 3210 | 2030 | 3210 | 3208 | 3210 |
| **74** | **GCA_900506745.1** | 1406 | 1407 | 1406 | 182 | 1406 | 1418 | 1420 |
| **75** | **GCA_900512545.1** | 3215 | 3215 | 3215 | 2038 | 3215 | 3216 | 3218 |
| **76** | **GCF_024495065.1** | 3952 | 3955 | 3952 | 3163 | 3952 | 3950 | 3952 |
| **77** | **GCF_024495515.1** | 3954 | 3957 | 3954 | 3165 | 3954 | 3952 | 3954 |
| **78** | **SAMEA113605448** | 3927 | 3930 | 3927 | 3160 | 3927 | 3924 | 3926 |
| **79** | **SAMEA113605746** | 3422 | 3423 | 3422 | 2261 | 3422 | 3422 | 3425 |
| **80** | **SAMEA2052930** | 3219 | 3220 | 3219 | 2042 | 3219 | 3220 | 3222 |
| **81** | **SAMEA2633723** | 10843 | 10843 | 10843 | 10271 | 10843 | 10828 | 10842 |
| **82** | **SAMEA3281566** | 3968 | 3968 | 3968 | 3179 | 3968 | 3965 | 3968 |
| **83** | **SAMEA5758680** | 3215 | 3215 | 3215 | 2035 | 3215 | 3213 | 3215 |
| **84** | **SAMEA6155812** | 0 | 0 | 0 | 1468 | 0 | 54 | 56 |
| **85** | **SAMEA6155829** | 0 | 0 | 0 | 1468 | 0 | 54 | 56 |
| **86** | **SAMEA6155886** | 0 | 0 | 0 | 1468 | 0 | 54 | 56 |
| **87** | **SAMEA6156048** | 0 | 0 | 0 | 1468 | 0 | 54 | 56 |
| **88** | **SAMEA6375606** | 1468 | 1468 | 1468 | 0 | 1468 | 1488 | 1490 |
| **89** | **SAMEA6635864** | 0 | 0 | 0 | 1468 | 0 | 54 | 56 |
| **90** | **SAMEA6654214** | 54 | 54 | 54 | 1488 | 54 | 0 | 4 |
| **91** | **SAMEA6654216** | 56 | 56 | 56 | 1490 | 56 | 4 | 0 |
| **92** | **SAMEA6654217** | 77 | 77 | 77 | 1514 | 77 | 25 | 27 |
| **93** | **SAMEA6654218** | 64 | 66 | 64 | 1498 | 64 | 12 | 14 |
| **94** | **SAMEA7472332** | 3240 | 3243 | 3240 | 2082 | 3240 | 3238 | 3240 |
| **95** | **SAMEA7472348** | 4009 | 4011 | 4009 | 3244 | 4009 | 4007 | 4009 |
| **96** | **SAMN16197932** | 1447 | 1447 | 1447 | 223 | 1447 | 1445 | 1447 |
| **97** | **SAMN16197933** | 1449 | 1449 | 1449 | 225 | 1449 | 1447 | 1449 |
| **98** | **SAMN16197935** | 1446 | 1446 | 1446 | 222 | 1446 | 1444 | 1446 |
| **99** | **SAMN17981712** | 3949 | 3949 | 3949 | 3161 | 3949 | 3947 | 3949 |

| **snp-dists 0.8.2** | | **92** | **93** | **94** | **95** | **96** | **97** | **98** | **99** |
| --- | --- | --- | --- | --- | --- | --- | --- | --- | --- |
| **SAMEA6654217** | **SAMEA6654218** | **SAMEA7472332** | **SAMEA7472348** | **SAMN16197932** | **SAMN16197933** | **SAMN16197935** | **SAMN17981712** |
| **1** | **A1** | 3995 | 3982 | 1487 | 272 | 3142 | 3144 | 3141 | 180 |
| **2** | **GCA_002186705.1** | 3959 | 3945 | 1451 | 154 | 3130 | 3132 | 3129 | 94 |
| **3** | **GCA_002186945.1** | 3961 | 3947 | 1451 | 154 | 3130 | 3132 | 3129 | 94 |
| **4** | **GCA_002187375.1** | 77 | 66 | 3237 | 4005 | 1441 | 1443 | 1440 | 3943 |
| **5** | **GCA_002187715.1** | 4055 | 4040 | 1546 | 202 | 3225 | 3227 | 3224 | 189 |
| **6** | **GCA_002188235.1** | 4045 | 4030 | 1536 | 192 | 3215 | 3217 | 3214 | 179 |
| **7** | **GCA_003195295.1** | 4320 | 4304 | 1871 | 644 | 3542 | 3544 | 3541 | 578 |
| **8** | **GCA_014788765.1** | 1470 | 1454 | 2040 | 3202 | 1 | 3 | 0 | 3119 |
| **9** | **GCA_015720195.1** | 1481 | 1466 | 2053 | 3214 | 126 | 128 | 125 | 3129 |
| **10** | **GCA_021441845.1** | 4024 | 4009 | 1513 | 303 | 3170 | 3172 | 3169 | 209 |
| **11** | **GCA_021920105.1** | 3956 | 3941 | 1446 | 191 | 3124 | 3126 | 3123 | 115 |
| **12** | **GCA_021920885.1** | 3247 | 3234 | 252 | 1512 | 2004 | 2006 | 2003 | 1423 |
| **13** | **GCA_021920985.1** | 3252 | 3239 | 257 | 1517 | 2009 | 2011 | 2008 | 1428 |
| **14** | **GCA_021925685.1** | 3258 | 3244 | 235 | 1522 | 2015 | 2017 | 2014 | 1435 |
| **15** | **GCA_021926845.1** | 3250 | 3240 | 233 | 1519 | 2012 | 2014 | 2011 | 1432 |
| **16** | **GCA_021928295.1** | 3240 | 3227 | 215 | 1505 | 1997 | 1999 | 1996 | 1416 |
| **17** | **GCA_021928995.1** | 3260 | 3251 | 248 | 1538 | 2022 | 2024 | 2021 | 1447 |
| **18** | **GCA_021929455.1** | 3262 | 3250 | 235 | 1523 | 2021 | 2023 | 2020 | 1441 |
| **19** | **GCA_021933415.1** | 10882 | 10875 | 9745 | 10520 | 10259 | 10258 | 10258 | 10462 |
| **20** | **GCA_021956765.1** | 1575 | 1559 | 2143 | 3305 | 284 | 286 | 283 | 3218 |
| **21** | **GCA_021957705.1** | 1445 | 1431 | 2016 | 3179 | 88 | 90 | 87 | 3094 |
| **22** | **GCA_022048705.1** | 4000 | 3985 | 1489 | 185 | 3146 | 3148 | 3145 | 110 |
| **23** | **GCA_022061125.1** | 1441 | 1426 | 2017 | 3180 | 90 | 92 | 89 | 3096 |
| **24** | **GCA_022084535.1** | 1430 | 1415 | 2000 | 3165 | 73 | 75 | 72 | 3079 |
| **25** | **GCA_022176145.1** | 25 | 12 | 3238 | 4007 | 1445 | 1447 | 1444 | 3946 |
| **26** | **GCA_022176185.1** | 30 | 17 | 3235 | 4004 | 1442 | 1444 | 1441 | 3944 |
| **27** | **GCA_022176205.1** | 25 | 13 | 3242 | 4011 | 1447 | 1449 | 1446 | 3949 |
| **28** | **GCA_022176585.1** | 26 | 13 | 3241 | 4009 | 1448 | 1450 | 1447 | 3950 |
| **29** | **GCA_022176645.1** | 23 | 12 | 3238 | 4007 | 1445 | 1447 | 1444 | 3947 |
| **30** | **GCA_022233245.1** | 3986 | 3970 | 1475 | 262 | 3132 | 3134 | 3131 | 170 |
| **31** | **GCA_022233305.1** | 4005 | 3989 | 1498 | 285 | 3155 | 3157 | 3154 | 193 |
| **32** | **GCA_022233405.1** | 10844 | 10841 | 9710 | 10480 | 10222 | 10221 | 10221 | 10421 |
| **33** | **GCA_022250515.1** | 3221 | 3208 | 226 | 1486 | 1978 | 1980 | 1977 | 1397 |
| **34** | **GCA_022270255.1** | 3246 | 3232 | 221 | 1506 | 2003 | 2005 | 2002 | 1422 |
| **35** | **GCA_022270275.1** | 3289 | 3278 | 266 | 1550 | 2046 | 2048 | 2045 | 1465 |
| **36** | **GCA_022270495.1** | 3269 | 3256 | 244 | 1532 | 2026 | 2028 | 2025 | 1445 |
| **37** | **GCA_022270575.1** | 3246 | 3233 | 224 | 1513 | 2003 | 2005 | 2002 | 1423 |
| **38** | **GCA_022270615.1** | 3250 | 3238 | 226 | 1513 | 2007 | 2009 | 2006 | 1426 |
| **39** | **GCA_022270695.1** | 3267 | 3256 | 244 | 1525 | 2024 | 2026 | 2023 | 1443 |
| **40** | **GCA_024392555.1** | 1456 | 1441 | 2026 | 3191 | 99 | 101 | 98 | 3105 |
| **41** | **GCA_024474865.1** | 3999 | 3984 | 1488 | 276 | 3145 | 3147 | 3144 | 183 |
| **42** | **GCA_025101225.1** | 3988 | 3973 | 1481 | 271 | 3138 | 3140 | 3137 | 176 |
| **43** | **GCA_026361275.1** | 4011 | 3998 | 1502 | 114 | 3179 | 3181 | 3178 | 143 |
| **44** | **GCA_030786325.1** | 4007 | 3993 | 1506 | 250 | 3180 | 3182 | 3179 | 176 |
| **45** | **GCA_030820975.1** | 1441 | 1428 | 2013 | 3174 | 84 | 86 | 83 | 3090 |
| **46** | **GCA_032044555.1** | 3248 | 3234 | 225 | 1508 | 2007 | 2009 | 2006 | 1425 |
| **47** | **GCA_032046295.1** | 3263 | 3252 | 246 | 1532 | 2020 | 2022 | 2019 | 1443 |
| **48** | **GCA_032062785.1** | 3242 | 3228 | 217 | 1504 | 1999 | 2001 | 1998 | 1418 |
| **49** | **GCA_032066125.1** | 3270 | 3257 | 243 | 1535 | 2027 | 2029 | 2026 | 1446 |
| **50** | **GCA_032066145.1** | 3244 | 3230 | 221 | 1507 | 2003 | 2005 | 2002 | 1422 |
| **51** | **GCA_032070585.1** | 3239 | 3227 | 218 | 1507 | 1996 | 1998 | 1995 | 1416 |
| **52** | **GCA_032070965.1** | 3245 | 3232 | 220 | 1509 | 2002 | 2004 | 2001 | 1421 |
| **53** | **GCA_032072835.1** | 3950 | 3934 | 1441 | 184 | 3118 | 3120 | 3117 | 110 |
| **54** | **GCA_032077145.1** | 3242 | 3229 | 221 | 1508 | 2000 | 2002 | 1999 | 1420 |
| **55** | **GCA_032128025.1** | 11466 | 11462 | 10337 | 11102 | 10849 | 10848 | 10848 | 11044 |
| **56** | **GCA_032129715.1** | 3247 | 3235 | 226 | 1513 | 2004 | 2006 | 2003 | 1424 |
| **57** | **GCA_032132495.1** | 3269 | 3255 | 244 | 1530 | 2026 | 2028 | 2025 | 1445 |
| **58** | **GCA_032132835.1** | 3301 | 3288 | 275 | 1539 | 2058 | 2060 | 2057 | 1450 |
| **59** | **GCA_032134135.1** | 4308 | 4295 | 1804 | 592 | 3455 | 3457 | 3454 | 505 |
| **60** | **GCA_032134975.1** | 3258 | 3244 | 236 | 1522 | 2015 | 2017 | 2014 | 1435 |
| **61** | **GCA_032137635.1** | 3243 | 3230 | 218 | 1508 | 2000 | 2002 | 1999 | 1419 |
| **62** | **GCA_032153315.1** | 3246 | 3233 | 221 | 1511 | 2003 | 2005 | 2002 | 1422 |
| **63** | **GCA_032155885.1** | 3243 | 3229 | 222 | 1505 | 2000 | 2002 | 1999 | 1419 |
| **64** | **GCA_032411785.1** | 3247 | 3235 | 226 | 1516 | 2005 | 2007 | 2004 | 1425 |
| **65** | **GCA_033106885.1** | 10891 | 10887 | 9754 | 10507 | 10266 | 10265 | 10265 | 10444 |
| **66** | **GCA_033107445.1** | 10866 | 10861 | 9733 | 10504 | 10245 | 10244 | 10244 | 10445 |
| **67** | **GCA_033108425.1** | 4356 | 4347 | 1972 | 810 | 3540 | 3542 | 3539 | 726 |
| **68** | **GCA_033122545.1** | 3347 | 3334 | 324 | 1614 | 2104 | 2106 | 2103 | 1525 |
| **69** | **GCA_900181095.1** | 3279 | 3268 | 166 | 1544 | 2057 | 2059 | 2056 | 1479 |
| **70** | **GCA_900502575.1** | 3234 | 3223 | 211 | 1497 | 1991 | 1993 | 1990 | 1410 |
| **71** | **GCA_900503265.1** | 1444 | 1431 | 2014 | 3175 | 152 | 154 | 151 | 3091 |
| **72** | **GCA_900504655.1** | 112 | 98 | 3191 | 3959 | 1395 | 1397 | 1394 | 3898 |
| **73** | **GCA_900504955.1** | 3232 | 3221 | 211 | 1497 | 1989 | 1991 | 1988 | 1410 |
| **74** | **GCA_900506745.1** | 1444 | 1431 | 2016 | 3177 | 107 | 109 | 106 | 3089 |
| **75** | **GCA_900512545.1** | 3240 | 3226 | 215 | 1502 | 1997 | 1999 | 1996 | 1416 |
| **76** | **GCF_024495065.1** | 3976 | 3961 | 1466 | 255 | 3122 | 3124 | 3121 | 161 |
| **77** | **GCF_024495515.1** | 3978 | 3963 | 1467 | 257 | 3124 | 3126 | 3123 | 162 |
| **78** | **SAMEA113605448** | 3950 | 3935 | 1449 | 194 | 3119 | 3121 | 3118 | 114 |
| **79** | **SAMEA113605746** | 3446 | 3433 | 508 | 1781 | 2223 | 2225 | 2222 | 1695 |
| **80** | **SAMEA2052930** | 3244 | 3233 | 221 | 1505 | 2001 | 2003 | 2000 | 1419 |
| **81** | **SAMEA2633723** | 10856 | 10849 | 9718 | 10492 | 10232 | 10231 | 10231 | 10434 |
| **82** | **SAMEA3281566** | 3992 | 3976 | 1483 | 271 | 3138 | 3140 | 3137 | 180 |
| **83** | **SAMEA5758680** | 3237 | 3223 | 212 | 1499 | 1993 | 1995 | 1992 | 1413 |
| **84** | **SAMEA6155812** | 77 | 66 | 3243 | 4011 | 1447 | 1449 | 1446 | 3949 |
| **85** | **SAMEA6155829** | 77 | 64 | 3240 | 4009 | 1447 | 1449 | 1446 | 3949 |
| **86** | **SAMEA6155886** | 77 | 66 | 3243 | 4011 | 1447 | 1449 | 1446 | 3949 |
| **87** | **SAMEA6156048** | 77 | 64 | 3240 | 4009 | 1447 | 1449 | 1446 | 3949 |
| **88** | **SAMEA6375606** | 1514 | 1498 | 2082 | 3244 | 223 | 225 | 222 | 3161 |
| **89** | **SAMEA6635864** | 77 | 64 | 3240 | 4009 | 1447 | 1449 | 1446 | 3949 |
| **90** | **SAMEA6654214** | 25 | 12 | 3238 | 4007 | 1445 | 1447 | 1444 | 3947 |
| **91** | **SAMEA6654216** | 27 | 14 | 3240 | 4009 | 1447 | 1449 | 1446 | 3949 |
| **92** | **SAMEA6654217** | 0 | 33 | 3262 | 4032 | 1471 | 1473 | 1470 | 3973 |
| **93** | **SAMEA6654218** | 33 | 0 | 3249 | 4020 | 1455 | 1457 | 1454 | 3957 |
| **94** | **SAMEA7472332** | 3262 | 3249 | 0 | 1532 | 2041 | 2043 | 2040 | 1463 |
| **95** | **SAMEA7472348** | 4032 | 4020 | 1532 | 0 | 3203 | 3205 | 3202 | 176 |
| **96** | **SAMN16197932** | 1471 | 1455 | 2041 | 3203 | 0 | 4 | 1 | 3120 |
| **97** | **SAMN16197933** | 1473 | 1457 | 2043 | 3205 | 4 | 0 | 3 | 3122 |
| **98** | **SAMN16197935** | 1470 | 1454 | 2040 | 3202 | 1 | 3 | 0 | 3119 |
| **99** | **SAMN17981712** | 3973 | 3957 | 1463 | 176 | 3120 | 3122 | 3119 | 0 |
